# Supplementary material for: Photoredox-catalyzed sulfonylation of diaryliodonium salts with DABSO and silyl enolates involving the insertion of SO2
Source: Royal Society of Chemistry journal article supplement (doi:10.1039/d4ra02773f), 2024-01-01

*Supporting Information*

**Photoredox-Catalyzed Sulfonylation of Diaryliodonium Salts with DABSO and  
Silyl Enolates Involving the Insertion of SO<sub>2</sub>**

**Table of Contents**

- I. General remarks
- II. Condition optimization
- III. General procedure for the photoredox-catalyzed sulfonylation of diaryliodonium salts with DABSO and silyl enolates
- IV. References
- V. Copies of NMR spectra

## I. General remarks

NMR spectra were obtained on Bruker AV-400 MHz and AV-600 MHz spectrometers. The  $^1\text{H}$  NMR chemical shifts were measured relative to  $\text{CDCl}_3$  as the internal reference ( $\text{CDCl}_3$ :  $\delta = 7.26$  ppm). The  $^{13}\text{C}$  NMR chemical shifts were given using  $\text{CDCl}_3$  as the internal standard ( $\text{CDCl}_3$ :  $\delta = 77.16$  ppm). High resolution mass spectra (HRMS) were obtained with a Waters-Q-TOF-Premier (ESI). Melting points were determined with XRC-1 and are uncorrected.

Unless otherwise noted, all reagents were obtained from commercial suppliers and used without further purification. Silyl enolates and diaryliodonium salts were prepared according to the literature procedures.<sup>[1]</sup>  $\text{SO}_2$ -MeCN solution was prepared according to the literature procedure.<sup>[2]</sup> All catalytic experiments were carried out using ultra dry solvents purchased from J&K Scientific. The GC internal standard,  $n\text{-C}_{12}\text{H}_{26}$  was degassed with nitrogen and dried over activated 4 Å molecular sieve beads before use. Gas chromatography (GC) analysis was performed on a Agilent8890B GC System with Agilent J & W GC column DB-5MS-UI.

## II. Condition optimization

*Procedure without any photocatalyst:* In a nitrogen-filled glove box, **1a** (0.2 mmol, 2.0 equiv), **2a** (0.1 mmol, 1.0 equiv), DABSO (0.2 mmol, 2.0 equiv), GC standard  $n\text{-C}_{12}\text{H}_{26}$  (10  $\mu\text{L}$ ) and 1,4-dioxane (1.0 mL) were added to a 10-mL Schlenk tube. After stirring at room temperature Under a specific light source for 12 h, the reaction mixture was diluted with 3 mL of EtOAc. Aliquots were taken from the organic phase, and passed through a short plug of silica gel with EtOAc washing (about 1.5 mL). The filtrate was subjected to GC analysis to determine the yield of the product **3a**.

**Table S1.** The effect of light source in the absence of photocatalysts.<sup>a</sup>

| 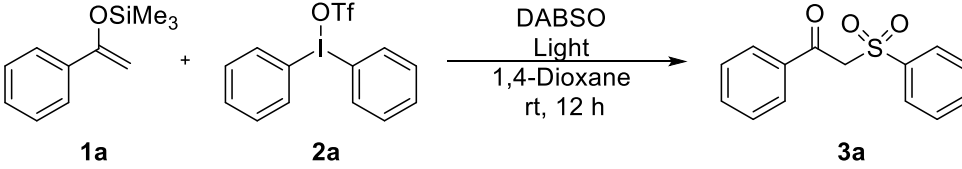 |                        |                                  |
|--------------------------------------------------------------------------------------|------------------------|----------------------------------|
| Entry                                                                                | Light                  | Yield <b>3a</b> (%) <sup>b</sup> |
| 1                                                                                    | 25 W blue LED (465 nm) | 47                               |

|                |                        |    |
|----------------|------------------------|----|
| 2              | 10 W blue LED (465 nm) | 35 |
| 3              | 30 W blue LED (465 nm) | 41 |
| 4              | 24 W white-light LED   | 0  |
| 5              | 18 W CFL               | 0  |
| 6              | Kessil light (390 nm)  | 15 |
| 7              | UV (600W)              | 24 |
| 8 <sup>c</sup> | 25 W blue LED (465 nm) | 55 |
| 9              | no light               | 0  |

<sup>a</sup> For entry 1-6 and 8, the sealed reaction test-tubes were placed in a test-tube rack on a magnetic stirplate that was flanked by two lights. The temperature in the test-tube rack was maintained  $\geq 30$  °C with a DC condensing fan. For entry 7, the mixture, placed around the mercury lamp (purchased from Yuming, Shanghai) with a distance of 10 centimeters, was stirred under UV irradiation (0.67 W cm<sup>-1</sup>) at room temperature. <sup>b</sup> GC yields. <sup>c</sup> The mixture was stirred for 24 h.

**Table S2.** The effect of base.<sup>a</sup>

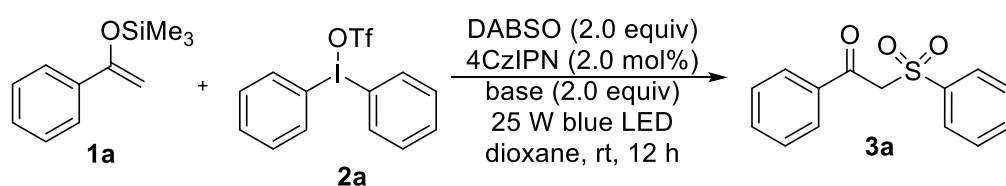

| Entry | base                            | Yield <b>3a</b> (%) <sup>b</sup> |
|-------|---------------------------------|----------------------------------|
| 1     | NaO <sup>t</sup> Bu             | 71                               |
| 2     | NaOH                            | 65                               |
| 3     | Na <sub>2</sub> CO <sub>3</sub> | 78                               |
| 4     | NaHCO <sub>3</sub>              | 80                               |
| 5     | NEt <sub>3</sub>                | 82                               |

<sup>a</sup> Reaction conditions: **1a** (2.0 equiv), **2a** (0.1 mmol, 1.0 equiv), DABSO (2.0 equiv), 4CzIPN (2 mol%), base (2.0 equiv) and *n*-C<sub>12</sub>H<sub>26</sub> (10 μL) in dioxane (1.0 mL) at room temperature for 12 h, irradiation with 25 W blue LED, under N<sub>2</sub>. <sup>b</sup> GC yields.

### III. General procedure for the photoredox-catalyzed sulfonation of diaryliodonium salts with DABSO and silyl enolates

In a nitrogen-filled glove box, **1a** (0.4 mmol, 2.0 equiv), **2a** (0.2 mmol, 1.0 equiv), DABSO (0.4 mmol, 2.0 equiv), 4CzIPN (2 mol%), and 1,4-dioxane (2.0 mL) were added to a 10-mL Schlenk tube. After stirring at room temperature under 25 W blue-light LED for 12 h, the reaction mixture was extracted with EtOAc. The solvent was removed under reduced pressure and the crude product was purified by silica gel flash chromatography (petroleum ether/EtOAc) to give the corresponding product.

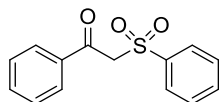

### 1-Phenyl-2-(phenylsulfonyl)ethan-1-one (**3a**)<sup>[3]</sup>

The product was isolated by flash chromatography (petroleum ether/EtOAc = 5/1, v/v) as a white solid. 85% yield. M.p.: 88-89 °C.

<sup>1</sup>H NMR (400 MHz, CDCl<sub>3</sub>): δ 7.94-7.88 (m, 4H), 7.68-7.60 (m, 2H), 7.56-7.52 (m, 2H), 7.49-7.45 (t, *J* = 8.0 Hz, 2H), 4.74 (s, 2H).

<sup>13</sup>C NMR (101 MHz, CDCl<sub>3</sub>): δ 188.1, 138.9, 135.8, 134.5, 134.4, 129.4, 129.3, 129.0, 128.7, 63.6.

HRMS (ESI) calcd for C<sub>14</sub>H<sub>13</sub>O<sub>3</sub>S [M+H]<sup>+</sup> 261.0585, found 261.0578.

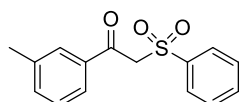

### 2-(Phenylsulfonyl)-1-(*m*-tolyl)ethan-1-one (**3b**)<sup>[3]</sup>

The product was isolated by flash chromatography (petroleum ether/EtOAc = 5/1, v/v) as a white solid. 67% yield. M.p.: 103-105 °C.

<sup>1</sup>H NMR (400 MHz, CDCl<sub>3</sub>): δ 7.91-7.88 (m, 2H), 7.73-7.71 (m, 2H), 7.68-7.63 (m, 1H), 7.56-7.52 (m, 2H), 7.43-7.41 (m, 1H), 7.37-7.33 (m, 1H), 4.73 (s, 2H), 2.39 (s, 3H).

<sup>13</sup>C NMR (101 MHz, CDCl<sub>3</sub>): δ 188.2, 138.9, 135.9, 135.3, 134.3, 129.8, 129.3, 128.9, 128.7, 126.7, 63.5, 21.4.

HRMS (ESI) calcd for C<sub>15</sub>H<sub>14</sub>NaO<sub>3</sub>S [M+Na]<sup>+</sup> 297.0561, found 297.0557.

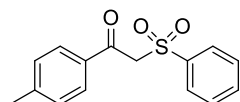

### 2-(Phenylsulfonyl)-1-(*p*-tolyl)ethan-1-one (**3c**)<sup>[3]</sup>

The product was isolated by flash chromatography (petroleum ether/EtOAc = 5/1, v/v) as a white solid. 71% yield. M.p.: 122-124 °C.

<sup>1</sup>H NMR (400 MHz, CDCl<sub>3</sub>): δ 7.91-7.88 (m, 2H), 7.84-7.82 (m, 2H), 7.68-7.64 (m, 1H), 7.56-7.52 (m, 2H), 7.28-7.26 (m, 2H), 4.71 (s, 2H), 2.42 (s, 3H).

<sup>13</sup>C NMR (101 MHz, CDCl<sub>3</sub>): δ 187.6, 145.8, 138.9, 134.3, 133.5, 129.7, 129.6, 129.3, 128.7, 63.6, 21.9.

HRMS (ESI) calcd for C<sub>15</sub>H<sub>14</sub>NaO<sub>3</sub>S [M+Na]<sup>+</sup> 297.0561, found 297.0557.

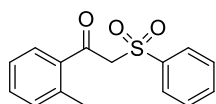

### 2-(Phenylsulfonyl)-1-(*o*-tolyl)ethan-1-one (3d)<sup>[3]</sup>

The product was isolated by flash chromatography (petroleum ether/EtOAc = 5/1, v/v) as a white solid. 69% yield. M.p.: 55-57 °C.

<sup>1</sup>H NMR (400 MHz, CDCl<sub>3</sub>): δ 7.88-7.86 (m, 2H), 7.71-7.69 (d, *J* = 8.0 Hz, 1H), 7.67-7.63 (m, 1H), 7.55-7.51 (m, 2H), 7.43-7.40 (m, 1H), 7.28-7.24 (m, 2H), 4.71 (s, 2H), 2.43 (s, 3H).

<sup>13</sup>C NMR (101 MHz, CDCl<sub>3</sub>): δ 190.5, 140.2, 139.1, 135.8, 134.3, 133.0, 132.4, 130.5, 129.3, 128.6, 126.1, 65.6, 21.6.

HRMS (ESI) calcd for C<sub>15</sub>H<sub>14</sub>NaO<sub>3</sub>S [M+Na]<sup>+</sup> 297.0561, found 297.0557.

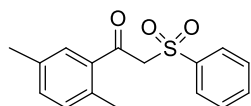

### 1-(2,5-Dimethylphenyl)-2-(phenylsulfonyl)ethan-1-one (3e)

The product was isolated by flash chromatography (petroleum ether/EtOAc = 5/1, v/v) as a white solid. 67% yield. M.p.: 65-66 °C.

<sup>1</sup>H NMR (400 MHz, CDCl<sub>3</sub>): δ 7.88-7.85 (m, 2H), 7.67-7.63 (m, 1H), 7.55-7.51 (m, 2H), 7.42 (s, 1H), 7.22-7.20 (d, *J* = 8.0 Hz, 1H), 7.13-7.11 (d, *J* = 8.0 Hz, 1H), 4.70 (s, 2H), 2.38 (s, 3H), 2.32 (s, 3H).

<sup>13</sup>C NMR (101 MHz, CDCl<sub>3</sub>): δ 190.6, 139.1, 137.0, 135.7, 135.6, 134.2, 133.7, 132.3, 130.9, 129.3, 128.6, 65.6, 21.1, 21.0.

HRMS (ESI) calcd for C<sub>16</sub>H<sub>16</sub>NaO<sub>3</sub>S [M+Na]<sup>+</sup> 311.0718, found 311.0712.

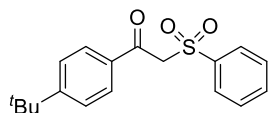

**1-(4-(*tert*-Butyl)phenyl)-2-(phenylsulfonyl)ethan-1-one (3f)**<sup>[4]</sup>

The product was isolated by flash chromatography (petroleum ether/EtOAc = 5/1, v/v) as colorless oil. 67% yield.

<sup>1</sup>H NMR (400 MHz, CDCl<sub>3</sub>): δ 7.91-7.86 (m, 4H), 7.68-7.64 (m, 1H), 7.56-7.52 (m, 2H), 7.50-7.47 (m, 2H), 4.72 (s, 2H), 1.34 (s, 9H).

<sup>13</sup>C NMR (101 MHz, CDCl<sub>3</sub>): δ 187.6, 158.6, 138.9, 134.3, 133.4, 129.5, 129.3, 128.7, 126.0, 63.6, 35.4, 31.1.

HRMS (ESI) calcd for C<sub>18</sub>H<sub>21</sub>O<sub>3</sub>S [M+H]<sup>+</sup> 317.1211, found 317.1205.

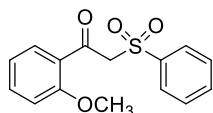

**1-(2-Methoxyphenyl)-2-(phenylsulfonyl)ethan-1-one (3g)**<sup>[5]</sup>

The product was isolated by flash chromatography (petroleum ether/EtOAc = 4/1, v/v) as a white solid. 65% yield. M.p.: 116-118 °C.

<sup>1</sup>H NMR (400 MHz, CDCl<sub>3</sub>): δ 7.87-7.85 (m, 2H), 7.66-7.64 (dd, *J* = 7.6, 1.6 Hz, 1H), 7.62-7.58 (m, 1H), 7.51-7.45 (m, 3H), 7.00-6.96 (m, 1H), 6.89-6.86 (d, *J* = 8.4 Hz, 1H), 4.94 (s, 2H), 3.85 (s, 3H).

<sup>13</sup>C NMR (101 MHz, CDCl<sub>3</sub>): δ 189.1, 159.0, 139.7, 135.4, 133.9, 131.3, 129.0, 128.6, 126.3, 121.1, 111.8, 67.5, 55.7.

HRMS (ESI) calcd for C<sub>15</sub>H<sub>14</sub>NaO<sub>4</sub>S [M+Na]<sup>+</sup> 313.0510, found 313.0505.

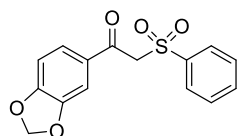

**1-(Benzo[*d*][1,3]dioxol-5-yl)-2-(phenylsulfonyl)ethan-1-one (3h)**<sup>[6]</sup>

The product was isolated by flash chromatography (petroleum ether/EtOAc = 4/1, v/v) as colorless oil. 65% yield.

<sup>1</sup>H NMR (400 MHz, CDCl<sub>3</sub>): δ 7.90-7.87 (m, 2H), 7.68-7.64 (m, 1H), 7.57-7.53 (m, 3H), 7.38 (d, *J* = 1.6 Hz, 1H), 6.86-6.84 (d, *J* = 8.4 Hz, 1H), 6.06 (s, 2H), 4.65 (s, 2H).

<sup>13</sup>C NMR (101 MHz, CDCl<sub>3</sub>): δ 185.9, 153.2, 148.6, 138.8, 134.3, 130.8, 129.3, 128.7,

126.9, 108.6, 108.2, 102.4, 63.6.

HRMS (ESI) calcd for C<sub>15</sub>H<sub>13</sub>O<sub>5</sub>S [M+H]<sup>+</sup> 305.0484, found 305.0478.

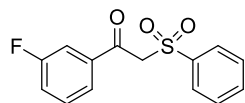

**1-(3-Fluorophenyl)-2-(phenylsulfonyl)ethan-1-one (3i)**<sup>[7]</sup>

The product was isolated by flash chromatography (petroleum ether/EtOAc = 5/1, v/v) as a white solid. 66% yield. M.p.: 102-103 °C.

<sup>1</sup>H NMR (400 MHz, CDCl<sub>3</sub>): δ 7.90-7.88 (m, 2H), 7.75-7.73 (m, 1H), 7.70-7.65 (m, 1H), 7.62-7.59 (m, 1H), 7.58-7.54 (m, 2H), 7.50-7.44 (m, 1H), 7.34-7.29 (m, 1H), 4.71 (s, 2H).

<sup>13</sup>C NMR (101 MHz, CDCl<sub>3</sub>): δ 187.0 (d, *J*<sub>C-F</sub> = 2.2 Hz), 164.2, 161.7 (d, *J*<sub>C-F</sub> = 250.0 Hz), 138.7, 137.9, 137.8 (d, *J*<sub>C-F</sub> = 6.5 Hz), 134.5, 130.8, 130.7, 129.4, 128.7, 125.4 (d, *J*<sub>C-F</sub> = 3.1 Hz), 125.4, 121.7, 121.5 (d, *J*<sub>C-F</sub> = 21.5 Hz), 116.0, 115.8 (d, *J*<sub>C-F</sub> = 23.0 Hz), 63.7.

<sup>19</sup>F NMR (377 MHz, CDCl<sub>3</sub>): δ -110.9, -111.0.

HRMS (ESI) calcd for C<sub>14</sub>H<sub>11</sub>FNaO<sub>3</sub>S [M+Na]<sup>+</sup> 301.0311, found 304.0306.

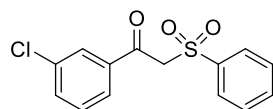

**1-(3-Chlorophenyl)-2-(phenylsulfonyl)ethan-1-one (3j)**<sup>[7]</sup>

The product was isolated by flash chromatography (petroleum ether/EtOAc = 5/1, v/v) as a white solid. 74% yield. M.p.: 98-100 °C.

<sup>1</sup>H NMR (400 MHz, CDCl<sub>3</sub>): δ 7.90-7.87 (m, 3H), 7.85-7.82 (m, 1H), 7.70-7.66 (m, 1H), 7.60-7.54 (m, 3H), 7.45-7.42 (m, 1H), 4.71 (s, 2H).

<sup>13</sup>C NMR (101 MHz, CDCl<sub>3</sub>): δ 187.0, 138.6, 137.3, 135.4, 134.6, 134.4, 130.3, 129.5, 129.3, 128.7, 127.7, 63.7.

HRMS (ESI) calcd for C<sub>14</sub>H<sub>11</sub>ClNaO<sub>3</sub>S [M+Na]<sup>+</sup> 317.0015, found 317.0007.

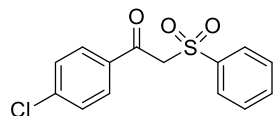

**1-(4-Chlorophenyl)-2-(phenylsulfonyl)ethan-1-one (3k)**<sup>[3]</sup>

The product was isolated by flash chromatography (petroleum ether/EtOAc = 5/1, v/v)

as a white solid. 75% yield. M.p.: 125-127 °C.

<sup>1</sup>H NMR (400 MHz, CDCl<sub>3</sub>): δ 7.90-7.86 (m, 4H), 7.69-7.65 (m, 1H), 7.57-7.53 (m, 2H), 7.47-7.43 (m, 2H), 4.71 (s, 2H).

<sup>13</sup>C NMR (101 MHz, CDCl<sub>3</sub>): δ 187.0, 141.3, 138.7, 134.5, 134.2, 130.9, 129.4, 129.4, 128.6, 63.7.

HRMS (ESI) calcd for C<sub>14</sub>H<sub>11</sub>ClNaO<sub>3</sub>S [M+Na]<sup>+</sup> 317.0015, found 317.0007.

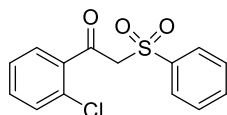

### 1-(2-Chlorophenyl)-2-(phenylsulfonyl)ethan-1-one (3l)<sup>[8]</sup>

The product was isolated by flash chromatography (petroleum ether/EtOAc = 5/1, v/v) as a white solid. 70% yield. M.p.: 58-60 °C.

<sup>1</sup>H NMR (400 MHz, CDCl<sub>3</sub>): δ 7.90-7.88 (m, 2H), 7.68-7.64 (m, 1H), 7.56-7.52 (m, 3H), 7.45-7.41 (m, 1H), 7.38-7.32 (m, 2H), 4.84 (s, 2H).

<sup>13</sup>C NMR (101 MHz, CDCl<sub>3</sub>): δ 190.3, 139.0, 137.4, 134.4, 133.3, 131.7, 130.8, 130.7, 129.4, 128.7, 127.4, 66.4.

HRMS (ESI) calcd for C<sub>14</sub>H<sub>11</sub>ClNaO<sub>3</sub>S [M+Na]<sup>+</sup> 317.0015, found 317.0007.

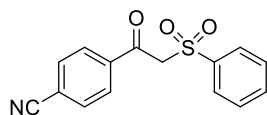

### 4-(2-(Phenylsulfonyl)acetyl)benzotrile (3m)<sup>[5]</sup>

The product was isolated by flash chromatography (petroleum ether/EtOAc = 4/1, v/v) as a white solid. 62% yield. M.p.: 136-138 °C.

<sup>1</sup>H NMR (400 MHz, CDCl<sub>3</sub>): δ 8.07-8.05 (m, 2H), 7.88-7.86 (m, 2H), 7.79-7.77 (m, 2H), 7.71-7.67 (m, 1H), 7.59-7.55 (m, 2H), 4.75 (s, 2H).

<sup>13</sup>C NMR (101 MHz, CDCl<sub>3</sub>): δ 187.1, 138.6, 138.5, 134.7, 132.8, 129.8, 129.5, 128.6, 117.7, 117.6, 63.8.

HRMS (ESI) calcd for C<sub>15</sub>H<sub>11</sub>NNaO<sub>3</sub>S [M+Na]<sup>+</sup> 308.0357, found 308.0362.

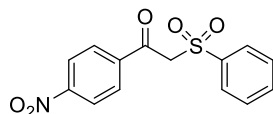

### 1-(4-Nitrophenyl)-2-(phenylsulfonyl)ethan-1-one (3n)<sup>[8]</sup>

The product was isolated by flash chromatography (petroleum ether/EtOAc = 3/1, v/v)



as a white solid. 55% yield. M.p.: 129-130 °C.

<sup>1</sup>H NMR (400 MHz, CDCl<sub>3</sub>): δ 8.34-8.33 (t, *J* = 2.0 Hz, 1H), 8.32-8.31 (t, *J* = 2.0 Hz, 1H), 8.16-8.15 (t, *J* = 2.0 Hz, 1H), 8.13-8.12 (t, *J* = 2.0 Hz, 1H), 7.90-7.87 (m, 2H), 7.73-7.68 (m, 1H), 7.60-7.56 (m, 2H), 4.78 (s, 2H).

<sup>13</sup>C NMR (101 MHz, CDCl<sub>3</sub>): δ 187.0, 151.0, 140.0, 138.5, 134.8, 130.6, 129.6, 128.6, 124.1, 64.1.

HRMS (ESI) calcd for C<sub>14</sub>H<sub>11</sub>NNaO<sub>5</sub>S [M+Na]<sup>+</sup> 328.0256, found 328.0263.

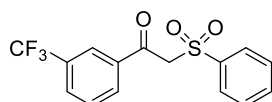

### 2-(Phenylsulfonyl)-1-(3-(trifluoromethyl)phenyl)ethan-1-one (3o)<sup>[9]</sup>

The product was isolated by flash chromatography (petroleum ether/EtOAc = 5/1, v/v) as a white solid. 62% yield. M.p.: 106-108 °C.

<sup>1</sup>H NMR (400 MHz, CDCl<sub>3</sub>): δ 8.17-8.15 (m, 2H), 7.89-7.85 (m, 3H), 7.70-7.62 (m, 2H), 7.58-7.54 (t, *J* = 8.0 Hz, 2H), 4.77 (s, 2H).

<sup>13</sup>C NMR (101 MHz, CDCl<sub>3</sub>): δ 187.1, 138.6, 136.3, 134.6, 132.7, 132.2, 131.9, 131.5, 131.2 (q, *J*<sub>C-F</sub> = 33.4 Hz), 130.9, 130.8 (q, *J*<sub>C-F</sub> = 3.6 Hz), 129.8, 129.5, 128.7, 127.6, 126.1, 126.0 (q, *J*<sub>C-F</sub> = 3.7 Hz), 124.9, 122.2, 119.5 (q, *J*<sub>C-F</sub> = 273.8 Hz), 63.7.

<sup>19</sup>F NMR (377 MHz, CDCl<sub>3</sub>): δ -62.9.

HRMS (ESI) calcd for C<sub>15</sub>H<sub>11</sub>F<sub>3</sub>NaO<sub>3</sub>S [M+Na]<sup>+</sup> 351.0279, found 351.0274.

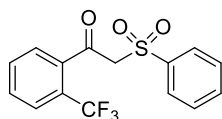

### 2-(Phenylsulfonyl)-1-(2-(trifluoromethyl)phenyl)ethan-1-one (3p)<sup>[10]</sup>

The product was isolated by flash chromatography (petroleum ether/EtOAc = 5/1, v/v) as a white solid. 68% yield. M.p.: 88-90 °C.

<sup>1</sup>H NMR (400 MHz, CDCl<sub>3</sub>): δ 7.94-7.91 (m, 2H), 7.71-7.62 (m, 5H), 7.60-7.56 (m, 2H), 4.66 (s, 2H).

<sup>13</sup>C NMR (101 MHz, CDCl<sub>3</sub>): δ 191.0, 138.7, 138.0, 134.5, 132.4, 131.6, 129.5, 128.7, 127.9, 127.6, 127.5, 127.3 (q, *J*<sub>C-F</sub> = 32.6 Hz), 127.1, 127.0, 126.9 (q, *J*<sub>C-F</sub> = 5.1 Hz), 124.8, 122.1, 119.4 (q, *J*<sub>C-F</sub> = 274.8 Hz), 66.6, 66.5 (q, *J*<sub>C-F</sub> = 2.0 Hz).

<sup>19</sup>F NMR (377 MHz, CDCl<sub>3</sub>): δ -57.7.

HRMS (ESI) calcd for C<sub>15</sub>H<sub>11</sub>F<sub>3</sub>NaO<sub>3</sub>S [M+Na]<sup>+</sup> 351.0279, found 351.0274.

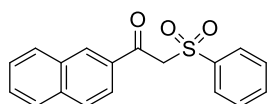

**1-(Naphthalen-2-yl)-2-(phenylsulfonyl)ethan-1-one (3q)**<sup>[5]</sup>

The product was isolated by flash chromatography (petroleum ether/EtOAc = 5/1, v/v) as a white solid. 61% yield. M.p.: 138-140 °C.

<sup>1</sup>H NMR (400 MHz, CDCl<sub>3</sub>): δ 8.46 (s, 1H), 7.97-7.86 (m, 6H), 7.66-7.62 (m, 2H), 7.59-7.51 (m, 3H), 4.87 (s, 2H).

<sup>13</sup>C NMR (101 MHz, CDCl<sub>3</sub>): δ 188.0, 138.8, 136.1, 134.4, 133.2, 132.4, 132.3, 130.1, 129.5, 129.3, 129.0, 128.7, 127.9, 127.3, 124.0, 63.7.

HRMS (ESI) calcd for C<sub>18</sub>H<sub>15</sub>O<sub>3</sub>S [M+H]<sup>+</sup> 311.0742, found 311.0750.

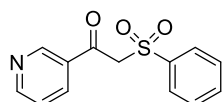

**2-(Phenylsulfonyl)-1-(pyridin-3-yl)ethan-1-one (3r)**<sup>[10]</sup>

The product was isolated by flash chromatography (petroleum ether/EtOAc = 2/1, v/v) as a white solid. 59% yield. M.p.: 108-109 °C.

<sup>1</sup>H NMR (400 MHz, CDCl<sub>3</sub>): δ 9.12-9.11 (d, *J* = 2.0 Hz, 1H), 8.81-8.79 (d, *J* = 3.2 Hz, 1H), 8.25-8.22 (dt, *J* = 8.0, 2.0 Hz, 1H), 7.88-7.86 (m, 2H), 7.69-7.65 (m, 1H), 7.57-7.53 (m, 2H), 7.45-7.42 (dd, *J* = 8.0, 4.8 Hz, 1H), 4.75 (s, 2H).

<sup>13</sup>C NMR (101 MHz, CDCl<sub>3</sub>): δ 187.3, 154.5, 150.6, 138.5, 136.7, 134.6, 131.3, 129.5, 128.6, 123.8, 63.8.

HRMS (ESI) calcd for C<sub>13</sub>H<sub>12</sub>NO<sub>3</sub>S [M+H]<sup>+</sup> 262.0538, found 262.0532.

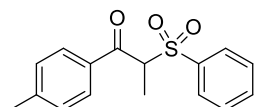

**2-(Phenylsulfonyl)-1-(p-tolyl)propan-1-one (3s)**<sup>[11]</sup>

The product was isolated by flash chromatography (petroleum ether/EtOAc = 5/1, v/v) as colorless oil. 62% yield.

<sup>1</sup>H NMR (400 MHz, CDCl<sub>3</sub>): δ 7.89-7.87 (d, *J* = 8.4 Hz, 2H), 7.80-7.77 (m, 2H), 7.67-7.63 (m, 1H), 7.54-7.50 (m, 2H), 7.29-7.27 (d, *J* = 8.0 Hz, 2H), 5.17-5.12 (d, *J* = 6.8 Hz, 1H), 2.42 (s, 3H), 1.57-1.55 (d, *J* = 6.8 Hz, 3H).

$^{13}\text{C}$  NMR (101 MHz,  $\text{CDCl}_3$ ):  $\delta$  192.1, 145.4, 136.2, 134.3, 133.9, 130.0, 129.6, 129.5, 129.0, 65.0, 21.9, 13.4.

HRMS (ESI) calcd for  $\text{C}_{16}\text{H}_{17}\text{O}_3\text{S}$   $[\text{M}+\text{H}]^+$  289.0898, found 289.0895.

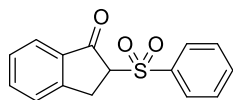

### 2-(Phenylsulfonyl)-2,3-dihydro-1H-inden-1-one (3t)<sup>[12]</sup>

The product was isolated by flash chromatography (petroleum ether/EtOAc = 5/1, v/v) as colorless oil. 57% yield.

$^1\text{H}$  NMR (400 MHz,  $\text{CDCl}_3$ ):  $\delta$  7.94-7.91 (m, 2H), 7.72-7.55 (m, 5H), 7.50-7.48 (m, 1H), 7.40-7.36 (m, 1H), 4.30-4.27 (m, 1H), 3.85-3.79 (m, 1H), 3.57-3.51 (m, 1H).

$^{13}\text{C}$  NMR (101 MHz,  $\text{CDCl}_3$ ):  $\delta$  194.6, 152.0, 137.6, 136.1, 135.9, 134.4, 129.4, 129.2, 128.4, 126.5, 125.0, 68.8, 28.2.

HRMS (ESI) calcd for  $\text{C}_{15}\text{H}_{13}\text{O}_3\text{S}$   $[\text{M}+\text{H}]^+$  273.0585, found 273.0589.

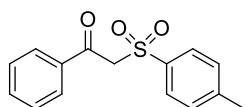

### 1-Phenyl-2-tosylethan-1-one (4a)<sup>[3]</sup>

The product was isolated by flash chromatography (petroleum ether/EtOAc = 5/1, v/v) as colorless oil. 68% yield.

$^1\text{H}$  NMR (400 MHz,  $\text{CDCl}_3$ ):  $\delta$  7.95-7.93 (m, 2H), 7.77-7.75 (m, 2H), 7.64-7.59 (m, 1H), 7.49-7.46 (m, 2H), 7.34-7.32 (d,  $J = 8.4$  Hz, 2H), 4.72 (s, 2H), 2.44 (s, 3H).

$^{13}\text{C}$  NMR (101 MHz,  $\text{CDCl}_3$ ):  $\delta$  188.3, 145.5, 135.9, 134.5, 130.0, 129.5, 129.0, 128.7, 63.7, 21.8.

HRMS (ESI) calcd for  $\text{C}_{15}\text{H}_{15}\text{O}_3\text{S}$   $[\text{M}+\text{H}]^+$  275.0742, found 275.0748.

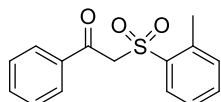

### 1-Phenyl-2-(*o*-tolylsulfonyl)ethan-1-one (4b)<sup>[3]</sup>

The product was isolated by flash chromatography (petroleum ether/EtOAc = 5/1, v/v) as colorless oil. 66% yield.

$^1\text{H}$  NMR (600 MHz,  $\text{CDCl}_3$ ):  $\delta$  7.96-7.94 (m, 2H), 7.89-7.87 (dd,  $J = 7.8, 1.2$  Hz, 1H), 7.63-7.60 (m, 1H), 7.54-7.51 (td,  $J = 7.2, 1.2$  Hz, 1H), 7.49-7.46 (m, 2H), 7.35-7.31

(m, 2H), 4.76 (s, 2H), 2.72 (s, 3H).

$^{13}\text{C}$  NMR (151 MHz,  $\text{CDCl}_3$ ):  $\delta$  188.1, 138.4, 137.0, 135.9, 134.5, 134.4, 132.9, 130.7, 129.5, 129.0, 126.7, 63.0, 20.7.

HRMS (ESI) calcd for  $\text{C}_{15}\text{H}_{15}\text{O}_3\text{S}$   $[\text{M}+\text{H}]^+$  275.0742, found 275.0748.

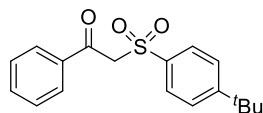

### 2-((4-(*tert*-Butyl)phenyl)sulfonyl)-1-phenylethan-1-one (**4c**)<sup>[9]</sup>

The product was isolated by flash chromatography (petroleum ether/EtOAc = 5/1, v/v) as a white solid. 70% yield. M.p.: 128-130 °C.

$^1\text{H}$  NMR (400 MHz,  $\text{CDCl}_3$ ):  $\delta$  7.94-7.91 (m, 2H), 7.82-7.79 (m, 2H), 7.62-7.58 (m, 1H), 7.55-7.51 (m, 2H), 7.48-7.44 (m, 2H), 4.72 (s, 2H), 1.33 (s, 9H).

$^{13}\text{C}$  NMR (101 MHz,  $\text{CDCl}_3$ ):  $\delta$  188.3, 158.4, 136.0, 135.9, 134.4, 129.4, 129.0, 128.6, 126.4, 63.7, 35.5, 31.2.

HRMS (ESI) calcd for  $\text{C}_{18}\text{H}_{21}\text{O}_3\text{S}$   $[\text{M}+\text{H}]^+$  317.1211, found 317.1205.

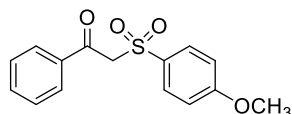

### 2-((4-Methoxyphenyl)sulfonyl)-1-phenylethan-1-one (**4d**)<sup>[3]</sup>

The product was isolated by flash chromatography (petroleum ether/EtOAc = 4/1, v/v) as colorless oil. 62% yield.

$^1\text{H}$  NMR (600 MHz,  $\text{CDCl}_3$ ):  $\delta$  7.96-7.95 (d,  $J = 7.2$  Hz, 2H), 7.82-7.79 (m, 2H), 7.63-7.61 (t,  $J = 7.2$  Hz, 1H), 7.50-7.47 (m, 2H), 7.00-6.98 (m, 2H), 4.71 (s, 2H), 3.88 (s, 3H).

$^{13}\text{C}$  NMR (151 MHz,  $\text{CDCl}_3$ ):  $\delta$  188.5, 164.3, 135.9, 134.5, 131.0, 130.3, 129.5, 129.0, 114.5, 63.9, 55.9.

HRMS (ESI) calcd for  $\text{C}_{15}\text{H}_{14}\text{NaO}_4\text{S}$   $[\text{M}+\text{Na}]^+$  313.0510, found 313.0506.

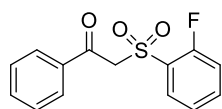

### 2-((2-Fluorophenyl)sulfonyl)-1-phenylethan-1-one (**4e**)<sup>[9]</sup>

The product was isolated by flash chromatography (petroleum ether/EtOAc = 5/1, v/v) as colorless oil. 60% yield.

$^1\text{H}$  NMR (400 MHz,  $\text{CDCl}_3$ ):  $\delta$  7.96-7.94 (m, 2H), 7.90-7.86 (m, 1H), 7.70-7.61 (m, 2H), 7.51-7.47 (t,  $J = 8.0$  Hz, 2H), 7.34-7.24 (m, 3H), 4.92 (s, 2H).

$^{13}\text{C}$  NMR (101 MHz,  $\text{CDCl}_3$ ):  $\delta$  187.9, 161.0, 158.5 (d,  $J_{\text{C-F}} = 256.8$  Hz), 136.8, 136.7 (d,  $J_{\text{C-F}} = 8.8$  Hz), 135.8, 134.6, 130.9, 129.3, 129.1, 126.8 (d,  $J_{\text{C-F}} = 14.0$  Hz), 124.9 (d,  $J_{\text{C-F}} = 3.6$  Hz), 117.3, 117.1 (d,  $J_{\text{C-F}} = 21.2$  Hz), 62.3 (d,  $J_{\text{C-F}} = 2.3$  Hz).

$^{19}\text{F}$  NMR (377 MHz,  $\text{CDCl}_3$ ):  $\delta$  -108.9.

HRMS (ESI) calcd for  $\text{C}_{14}\text{H}_{12}\text{FO}_3\text{S}$   $[\text{M}+\text{H}]^+$  279.0491, found 279.0485.

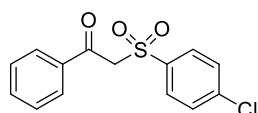

#### 2-((4-Chlorophenyl)sulfonyl)-1-phenylethan-1-one (**4f**)<sup>[3]</sup>

The product was isolated by flash chromatography (petroleum ether/EtOAc = 5/1, v/v) as a white solid. 71% yield. M.p.: 102-104 °C.

$^1\text{H}$  NMR (400 MHz,  $\text{CDCl}_3$ ):  $\delta$  7.95-7.92 (m, 2H), 7.85-7.82 (m, 2H), 7.66-7.62 (m, 1H), 7.54-7.48 (m, 4H), 4.74 (s, 2H).

$^{13}\text{C}$  NMR (101 MHz,  $\text{CDCl}_3$ ):  $\delta$  188.0, 141.3, 137.2, 135.7, 134.7, 130.3, 129.7, 129.4, 129.1, 63.5.

HRMS (ESI) calcd for  $\text{C}_{14}\text{H}_{11}\text{ClNaO}_3\text{S}$   $[\text{M}+\text{Na}]^+$  317.0015, found 317.0019.

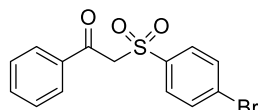

#### 2-((4-Bromophenyl)sulfonyl)-1-phenylethan-1-one (**4g**)<sup>[4]</sup>

The product was isolated by flash chromatography (petroleum ether/EtOAc = 5/1, v/v) as a white solid. 65% yield. M.p.: 112-113 °C.

$^1\text{H}$  NMR (400 MHz,  $\text{CDCl}_3$ ):  $\delta$  7.95-7.92 (m, 2H), 7.77-7.74 (m, 2H), 7.70-7.62 (m, 3H), 7.52-7.48 (m, 2H), 4.74 (s, 2H).

$^{13}\text{C}$  NMR (101 MHz,  $\text{CDCl}_3$ ):  $\delta$  188.0, 137.7, 135.7, 134.7, 132.7, 130.4, 129.9, 129.4, 129.1, 63.4.

HRMS (ESI) calcd for  $\text{C}_{14}\text{H}_{11}\text{BrNaO}_3\text{S}$   $[\text{M}+\text{Na}]^+$  360.9510, found 360.9507.

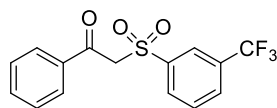

#### 1-Phenyl-2-((3-(trifluoromethyl)phenyl)sulfonyl)ethan-1-one (**4h**)<sup>[9]</sup>

The product was isolated by flash chromatography (petroleum ether/EtOAc = 5/1, v/v) as a white solid. 62% yield. M.p.: 72-74 °C.

<sup>1</sup>H NMR (600 MHz, CDCl<sub>3</sub>): δ 8.17 (s, 1H), 8.13-8.11 (d, *J* = 7.8 Hz, 1H), 7.93-7.91 (m, 3H), 7.73-7.71 (t, *J* = 7.8 Hz, 1H), 7.66-7.63 (m, 1H), 7.51-7.49 (m, 2H), 4.79 (s, 2H).

<sup>13</sup>C NMR (101 MHz, CDCl<sub>3</sub>): δ 187.9, 140.0, 135.6, 134.8, 132.6, 132.3, 131.9, 131.6 (q, *J*<sub>C-F</sub> = 34.1 Hz), 131.1, 131.0 (q, *J*<sub>C-F</sub> = 3.2 Hz), 130.1, 129.3, 129.2, 126.1, 126.0 (q, *J*<sub>C-F</sub> = 3.8 Hz), 123.8, 121.8, 119.8, 117.9 (q, *J*<sub>C-F</sub> = 202.3 Hz), 114.2, 63.3.

<sup>19</sup>F NMR (565 MHz, CDCl<sub>3</sub>): δ -62.8.

HRMS (ESI) calcd for C<sub>15</sub>H<sub>12</sub>F<sub>3</sub>O<sub>3</sub>S [M+H]<sup>+</sup> 329.0459, found 329.0457.

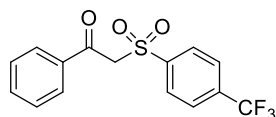

#### 1-Phenyl-2-((4-(trifluoromethyl)phenyl)sulfonyl)ethan-1-one (4i)<sup>[13]</sup>

The product was isolated by flash chromatography (petroleum ether/EtOAc = 5/1, v/v) as a white solid. 58% yield. M.p.: 98-99 °C.

<sup>1</sup>H NMR (400 MHz, CDCl<sub>3</sub>): δ 8.06-8.04 (d, *J* = 8.4 Hz, 2H), 7.93-7.91 (m, 2H), 7.83-7.81 (d, *J* = 8.0 Hz, 2H), 7.66-7.61 (m, 1H), 7.51-7.47 (t, *J* = 8.0 Hz, 2H), 4.78 (s, 2H).

<sup>13</sup>C NMR (101 MHz, CDCl<sub>3</sub>): δ 187.9, 142.2, 136.5, 136.1, 135.8, 135.6, 135.5 (q, *J*<sub>C-F</sub> = 33.0 Hz), 134.8, 129.5, 129.3, 129.1, 128.9, 128.2, 127.3, 127.2, 126.5, 126.4 (q, *J*<sub>C-F</sub> = 3.8 Hz), 126.2, 126.1 (q, *J*<sub>C-F</sub> = 3.3 Hz), 125.9, 124.5, 121.8, 119.1 (q, *J*<sub>C-F</sub> = 274.1 Hz), 63.2.

<sup>19</sup>F NMR (377 MHz, CDCl<sub>3</sub>): δ -63.3.

HRMS (ESI) calcd for C<sub>15</sub>H<sub>12</sub>F<sub>3</sub>O<sub>3</sub>S [M+H]<sup>+</sup> 329.0459, found 329.0457.

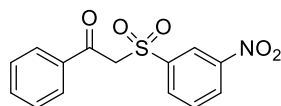

#### 2-((3-Nitrophenyl)sulfonyl)-1-phenylethan-1-one (4j)<sup>[9]</sup>

The product was isolated by flash chromatography (petroleum ether/EtOAc = 3/1, v/v) as a white solid. 53% yield. M.p.: 119-121 °C.

<sup>1</sup>H NMR (600 MHz, CDCl<sub>3</sub>): δ 8.77-8.76 (t, *J* = 1.8 Hz, 1H), 8.54-8.52 (m, 1H),

8.27-8.26 (m, 1H), 7.94-7.92 (m, 2H), 7.81-7.79 (t,  $J = 7.8$  Hz, 1H), 7.68-7.65 (m, 1H), 7.53-7.50 (m, 2H), 4.83 (s, 2H).

$^{13}\text{C}$  NMR (101 MHz,  $\text{CDCl}_3$ ):  $\delta$  187.9, 148.4, 140.8, 135.5, 135.0, 134.7, 130.7, 129.3, 129.2, 128.8, 124.3, 63.1.

HRMS (ESI) calcd for  $\text{C}_{14}\text{H}_{11}\text{NNaO}_5\text{S}$   $[\text{M}+\text{Na}]^+$  328.0256, found 328.0260.

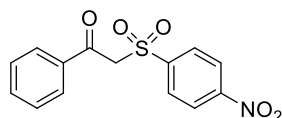

#### 2-((4-Nitrophenyl)sulfonyl)-1-phenylethan-1-one (**4k**)<sup>[4]</sup>

The product was isolated by flash chromatography (petroleum ether/EtOAc = 3/1, v/v) as colorless oil. 55% yield.

$^1\text{H}$  NMR (400 MHz,  $\text{CDCl}_3$ ):  $\delta$  8.42-8.38 (m, 2H), 8.14-8.11 (m, 2H), 7.95-7.92 (m, 2H), 7.69-7.64 (m, 1H), 7.54-7.50 (m, 2H), 4.81 (s, 2H).

$^{13}\text{C}$  NMR (101 MHz,  $\text{CDCl}_3$ ):  $\delta$  187.8, 144.2, 137.2, 135.5, 135.0, 130.5, 129.3, 129.2, 124.5, 63.1.

HRMS (ESI) calcd for  $\text{C}_{14}\text{H}_{11}\text{NNaO}_5\text{S}$   $[\text{M}+\text{Na}]^+$  328.0256, found 328.0260.

## IV. References

- [1] (a) Khan, I.; Reed-Berendt, B. G.; Melen, R. L.; Morrill, L. C. FLP-Catalyzed Transfer Hydrogenation of Silyl Enol Ethers. *Angew. Chem., Int. Ed.* **2018**, *57*, 12356-12359. (b) Ma, Y.; Pan, Q.; Ou, C.; Cai, Y.; Ma, X.; Liu, C. Aryl sulfonyl fluoride synthesis via organophotocatalytic fluorosulfonylation of diaryliodonium salts. *Org. Biomol. Chem.* **2023**, *21*, 7597-7601.
- [2] Malet-Sanz, L.; Madrzak, J.; Ley, S. V.; Baxendale, I. R. Preparation of arylsulfonyl chlorides by chlorosulfonylation of in situ generated diazonium salts using a continuous flow reactor. *Org. Biomol. Chem.* **2010**, *8*, 5324-5332.
- [3] Liu, T.; Zheng, D.; Ding, Y.; Fan, X.; Wu, J. Synthesis of  $\beta$ -Keto Sulfones by a Catalyst-Free Reaction of Aryldiazonium Tetrafluoroborates, Sulfur Dioxide, and Silyl Enol Ethers. *Chem. Asian J.* **2017**, *12*, 465-469.
- [4] Yu, J.; Mao, R.; Wang, Q.; Wu, J. Synthesis of  $\beta$ -keto sulfones via a multicomponent reaction through sulfonylation and decarboxylation. *Org. Chem.*

*Front.* **2017**, *4*, 617-621.

[5] Chawla, R.; Singh, A. K.; Yadav, L. D. S.  $K_2S_2O_8$ -Mediated Aerobic Oxysulfonylation of Olefins into  $\beta$ -Keto Sulfones in Aqueous Media. *Eur. J. Org. Chem.* **2014**, *2014*, 2032-2036.

[6] Dam, B.; Sahoo, A. K.; Patel, B. K. Visible-light-mediated synthesis of  $\beta$ -keto sulfones using g-C<sub>3</sub>N<sub>4</sub> as a recyclable photocatalyst under sustainable conditions. *Green Chem.* **2022**, *24*, 7122-7130.

[7] Bao, F. Selenium-Catalyzed Electrophilic Cascade Reactions of Vinylarenes with N-Fluorobenzenesulfonimide: A Novel Strategy for the Synthesis of  $\beta$ -Keto Sulfones. *Asian J. Org. Chem.* **2023**, *12*, e202300407.

[8] Pandey, G. Vaitla, J. Desulfonylative Methenylation of  $\beta$ -Keto Sulfones. *Org. Lett.* **2015**, *17*, 4890-4893.

[9] Xu, J.; Shen, C.; Qin, X.; Wu, J.; Zhang, P.; Liu, X. Oxidative Sulfonylation of Hydrazones Enabled by Synergistic Copper/Silver Catalysis. *J. Org. Chem.* **2021**, *86*, 3706-3720.

[10] He, J.; Mao, W.; Lin, J.; Wu, Y.; Chen, L.; Yang, P.; Song, D.; Zhu, P.; Zhong, W.; Ling, F. Enantioselective synthesis of chiral  $\beta$ -hydroxy sulfones via manganese catalyzed asymmetric hydrogenation, *Org. Chem. Front.* **2023**, *10*, 3321-3327.

[11] Wan, H.-L.; Guan, Z.; He, Y.-H. Electrochemically Promoted Bifunctionalization of Alkynes for the Synthesis of  $\beta$ -Keto Sulfones. *Asian J. Org. Chem.* **2021**, *10*, 3406-3410.

[12] Touge, T.; Nara, H.; Kida, M.; Matsumura, K.; Kayaki, Y. Convincing Catalytic Performance of Oxo-Tethered Ruthenium Complexes for Asymmetric Transfer Hydrogenation of Cyclic  $\alpha$ -Halogenated Ketones through Dynamic Kinetic Resolution. *Org. Lett.* **2021**, *23*, 3070-3075.

[13] Tsui, G. C.; Glenadel, Q.; Lau, C.; Lautens, M. Rhodium(I)-Catalyzed Addition of Arylboronic Acids to (Benzyl-/Arylsulfonyl)acetonitriles: Efficient Synthesis of (Z)- $\beta$ -Sulfonylvinylamines and  $\beta$ -Keto Sulfones. *Org. Lett.* **2011**, *13*, 208-211.



## V. Copies of NMR spectra

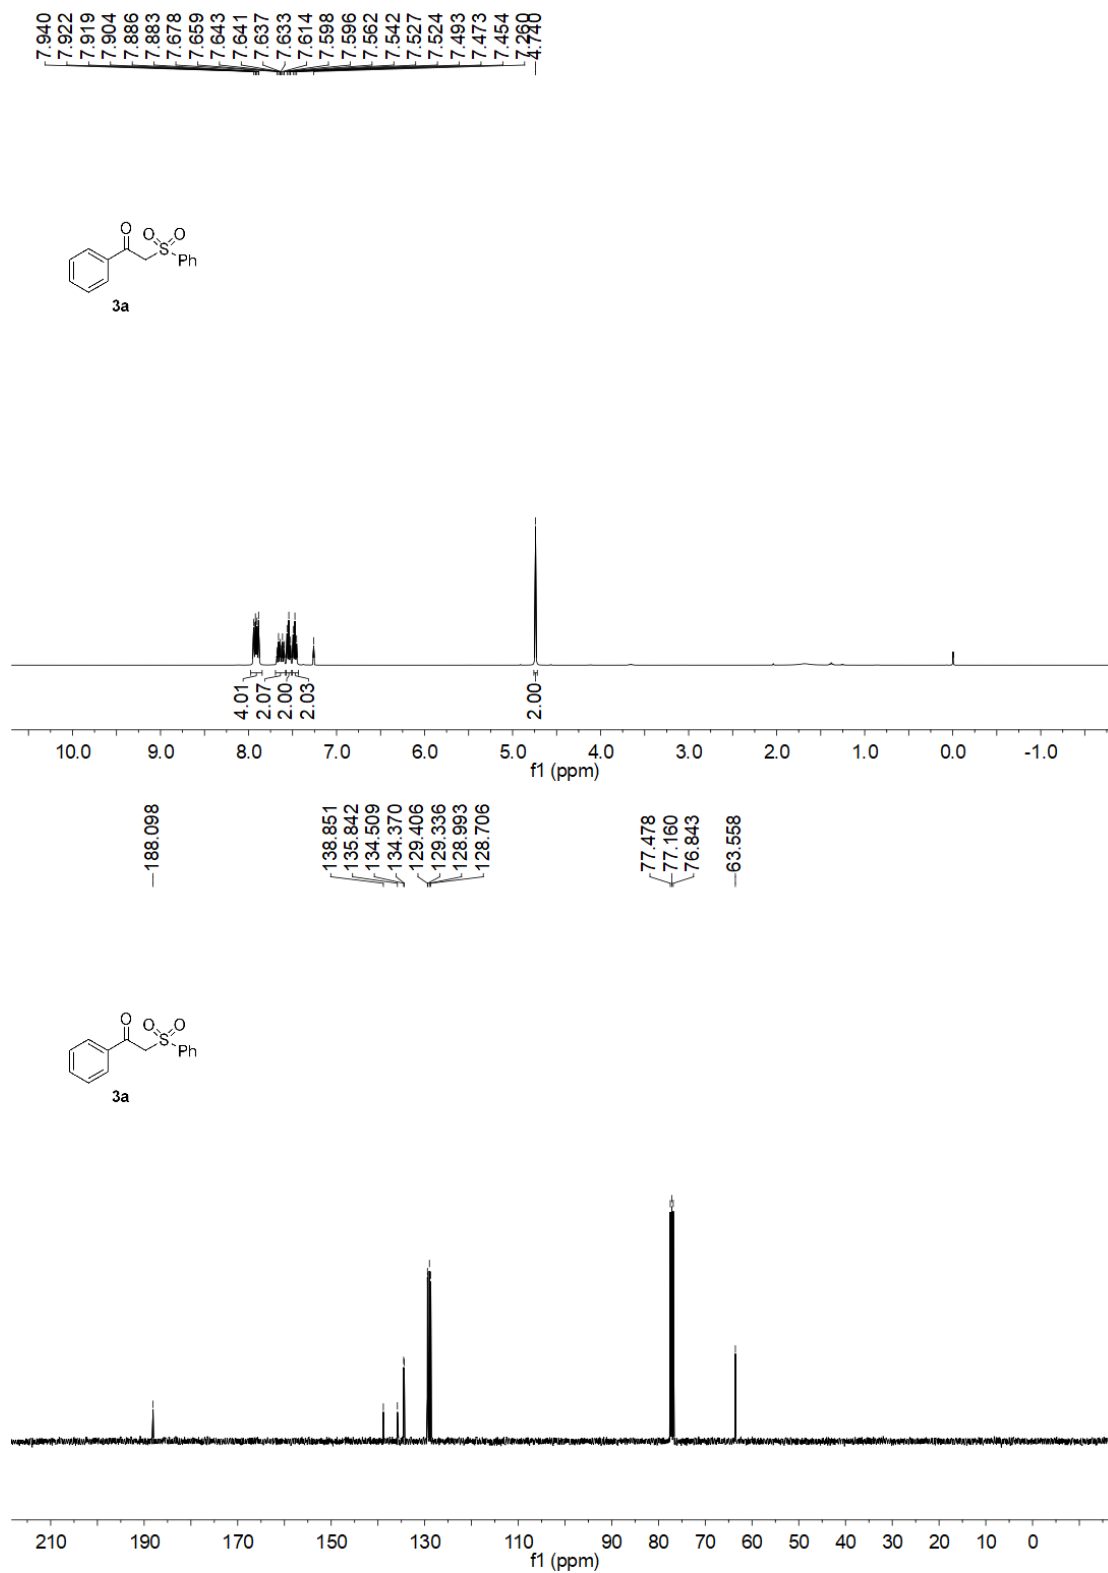

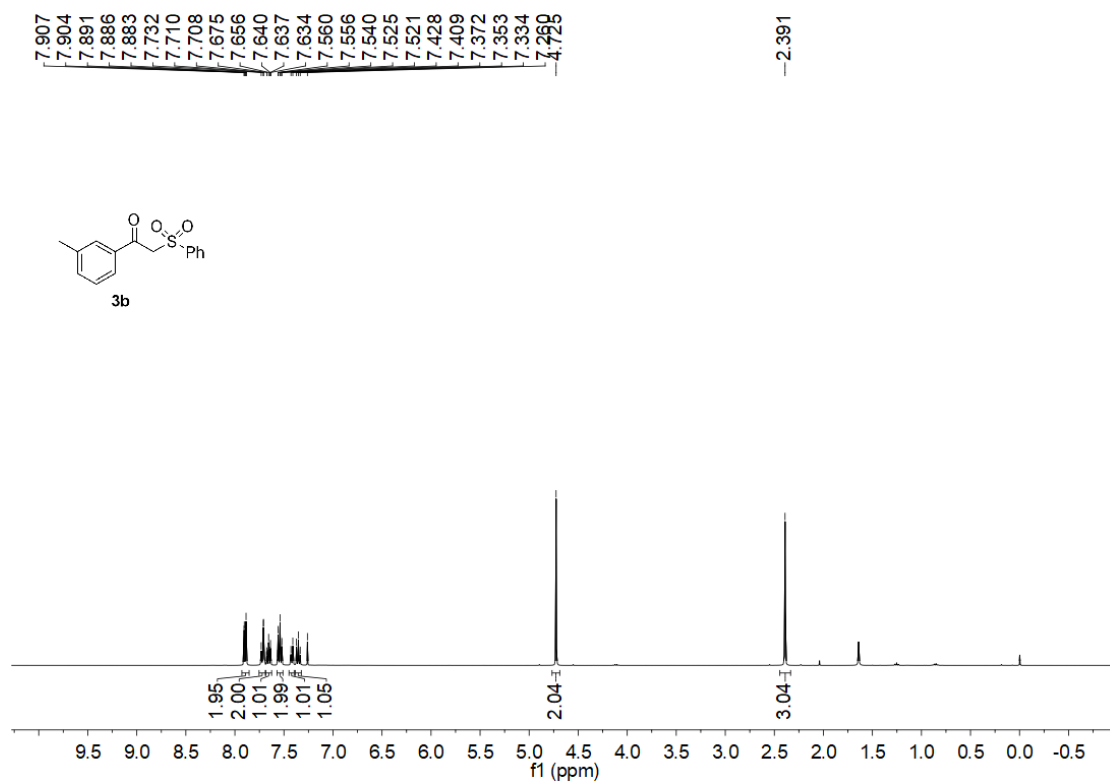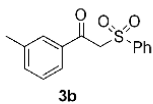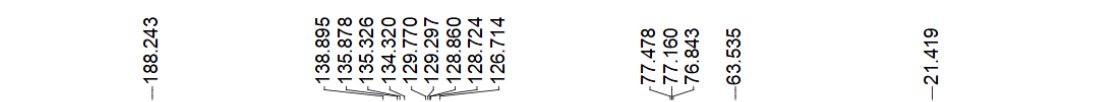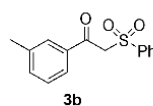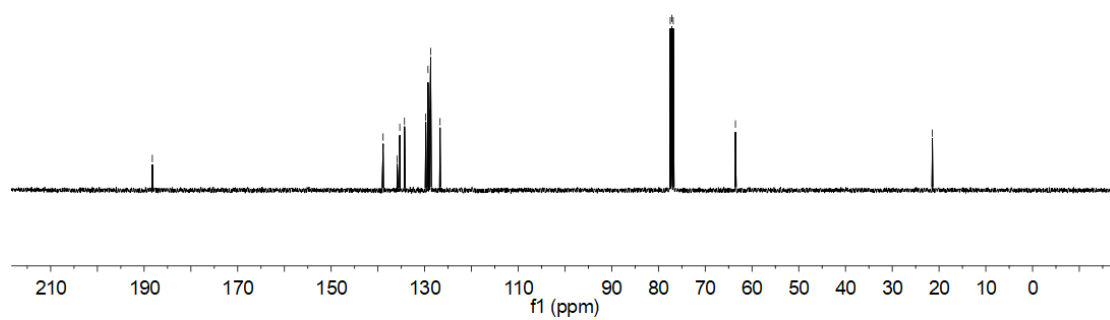

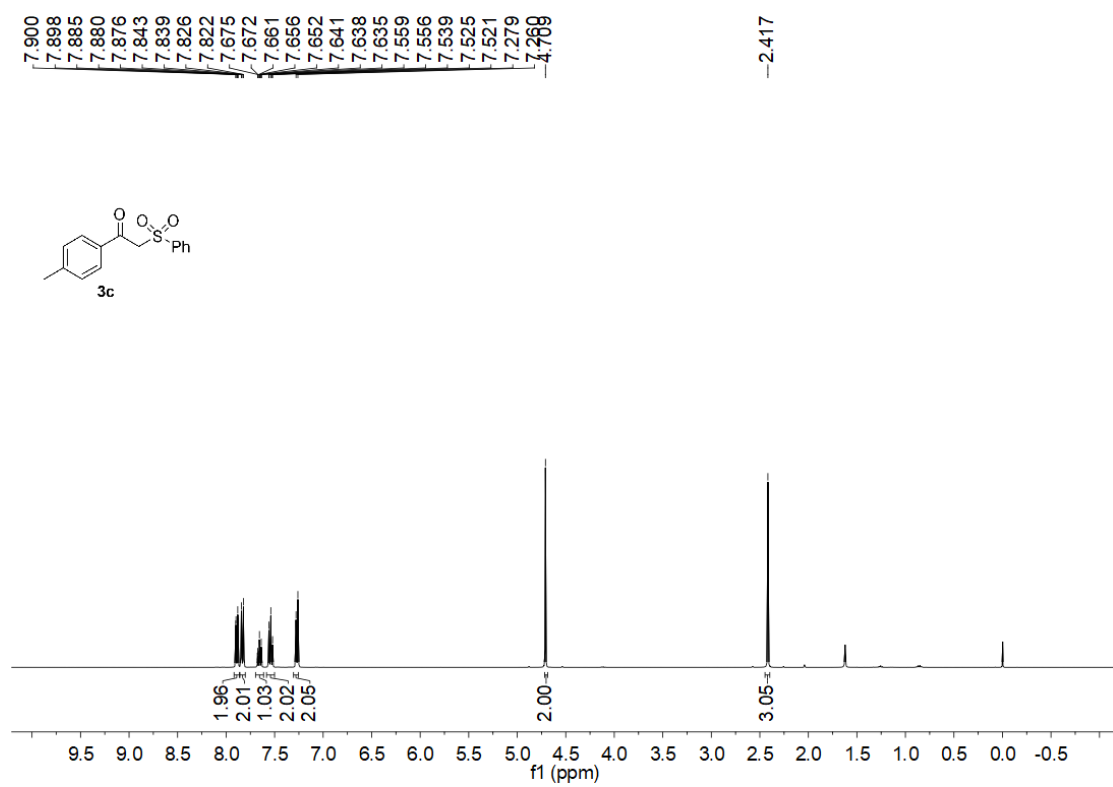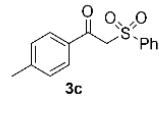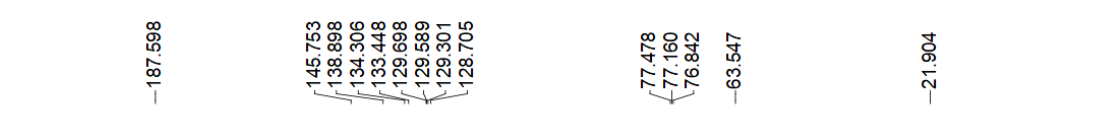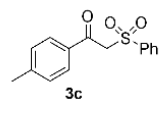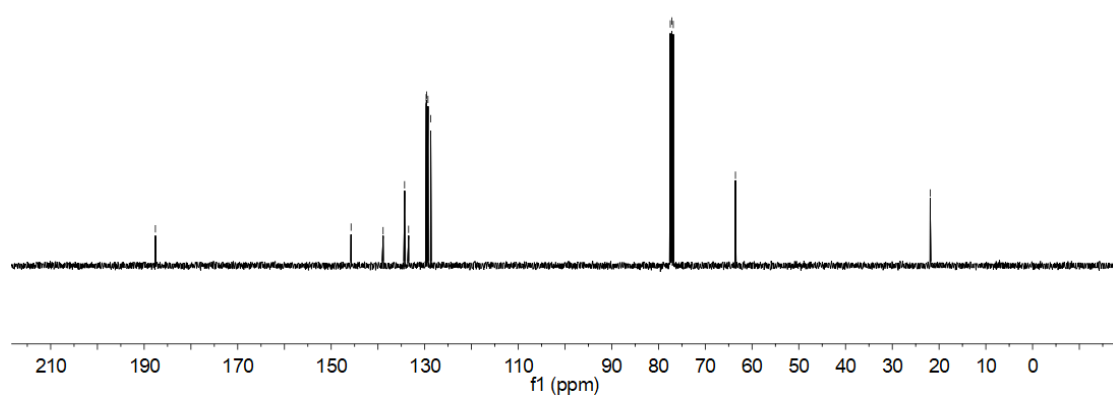

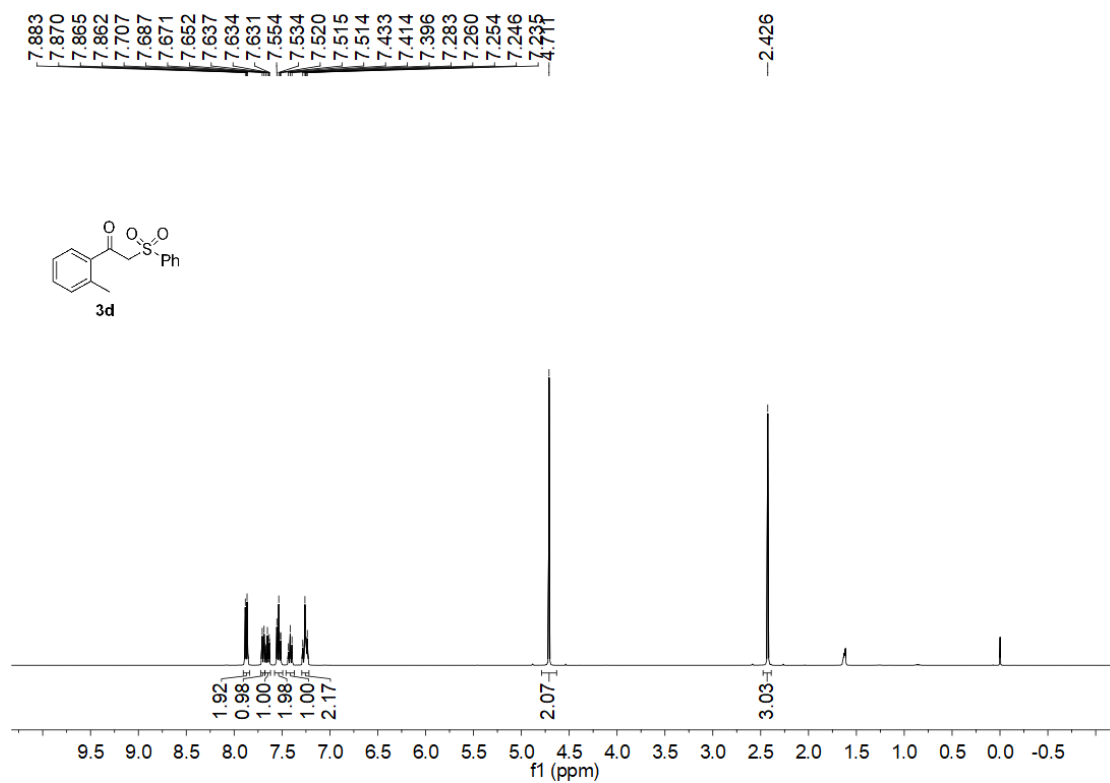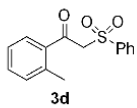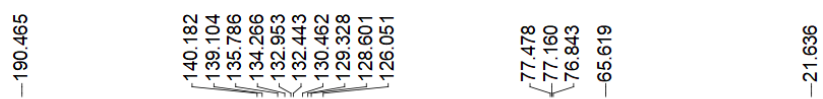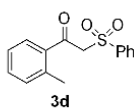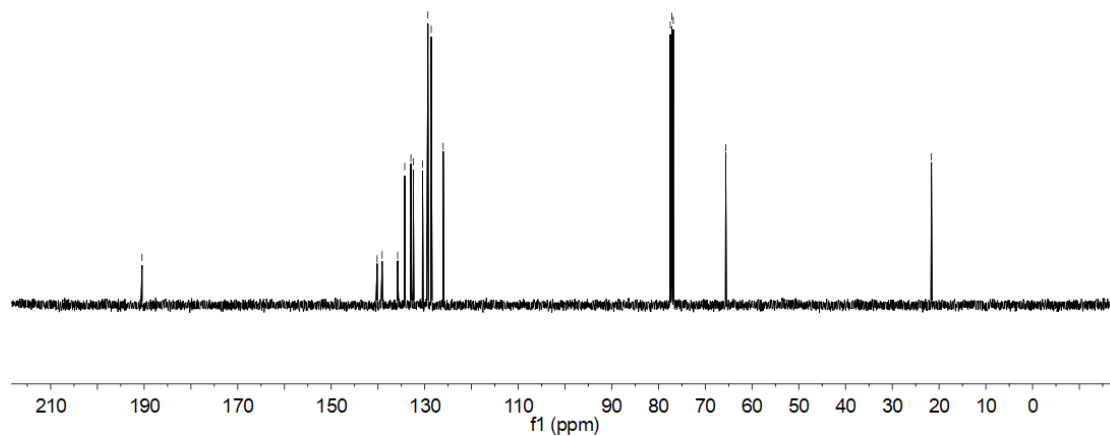

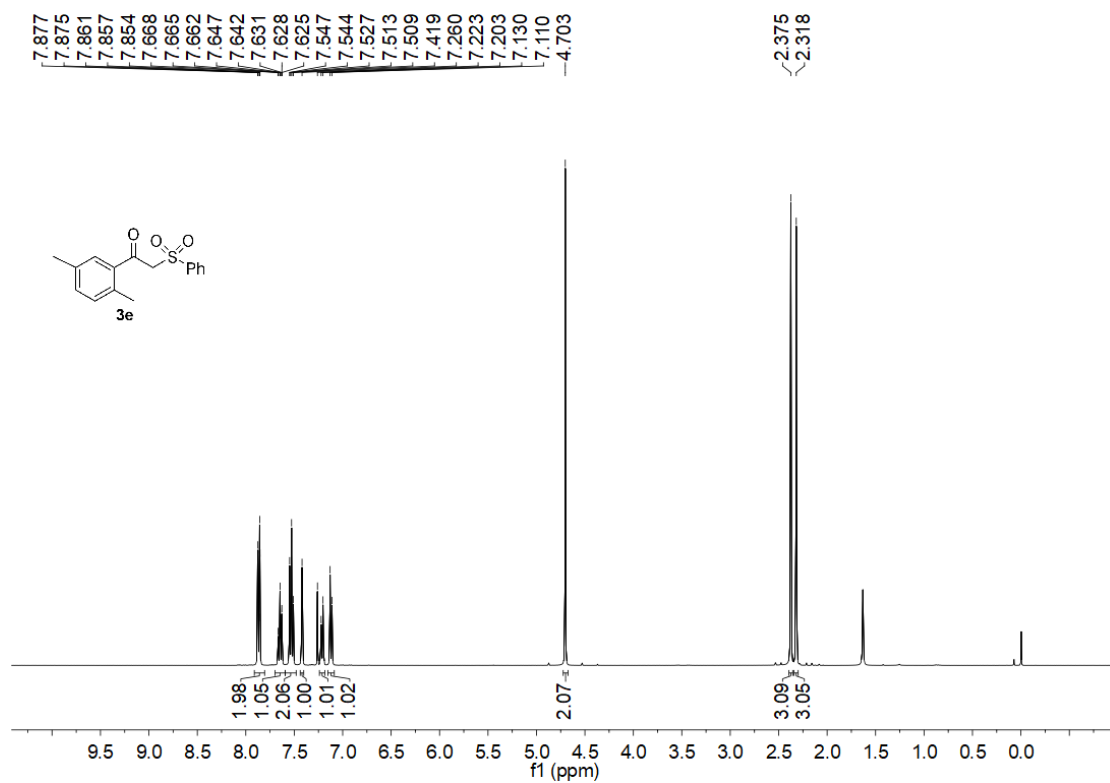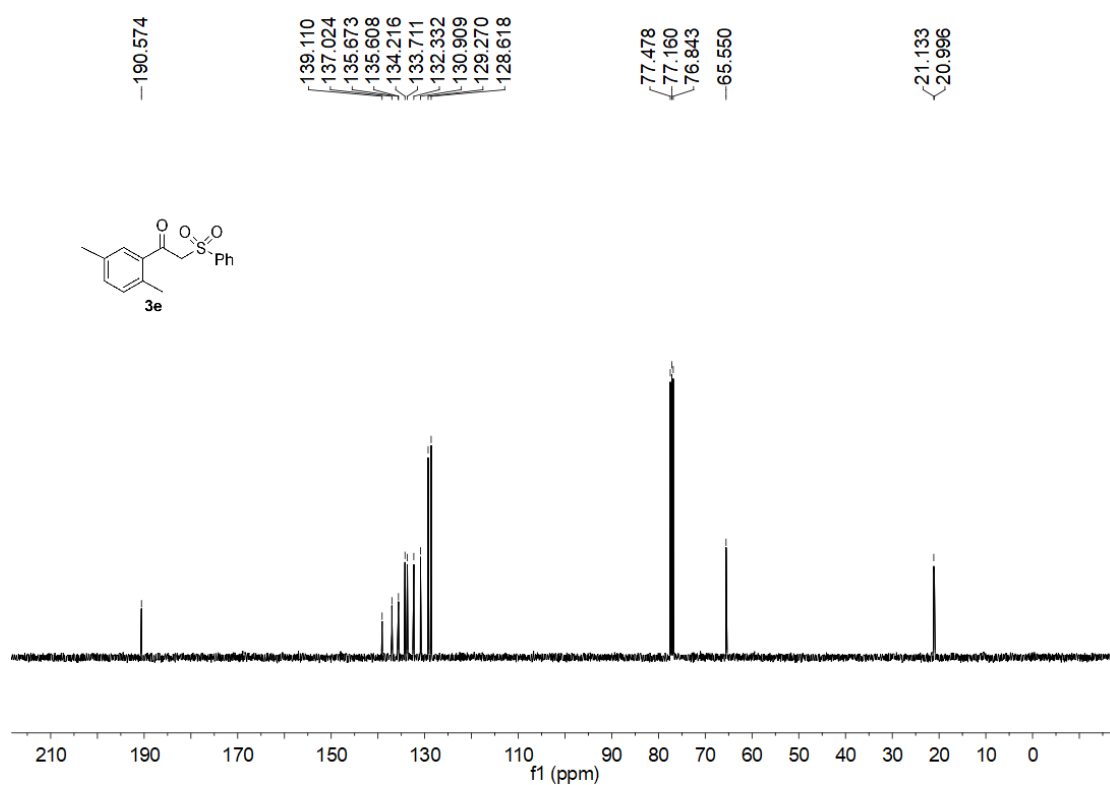

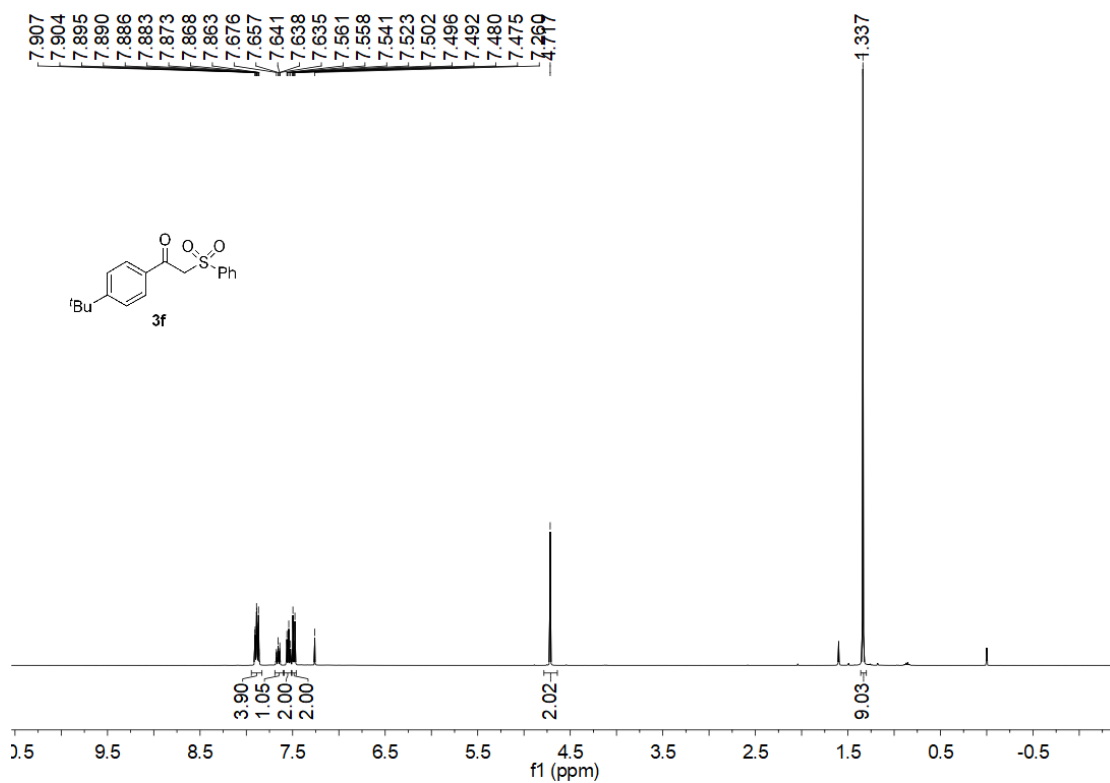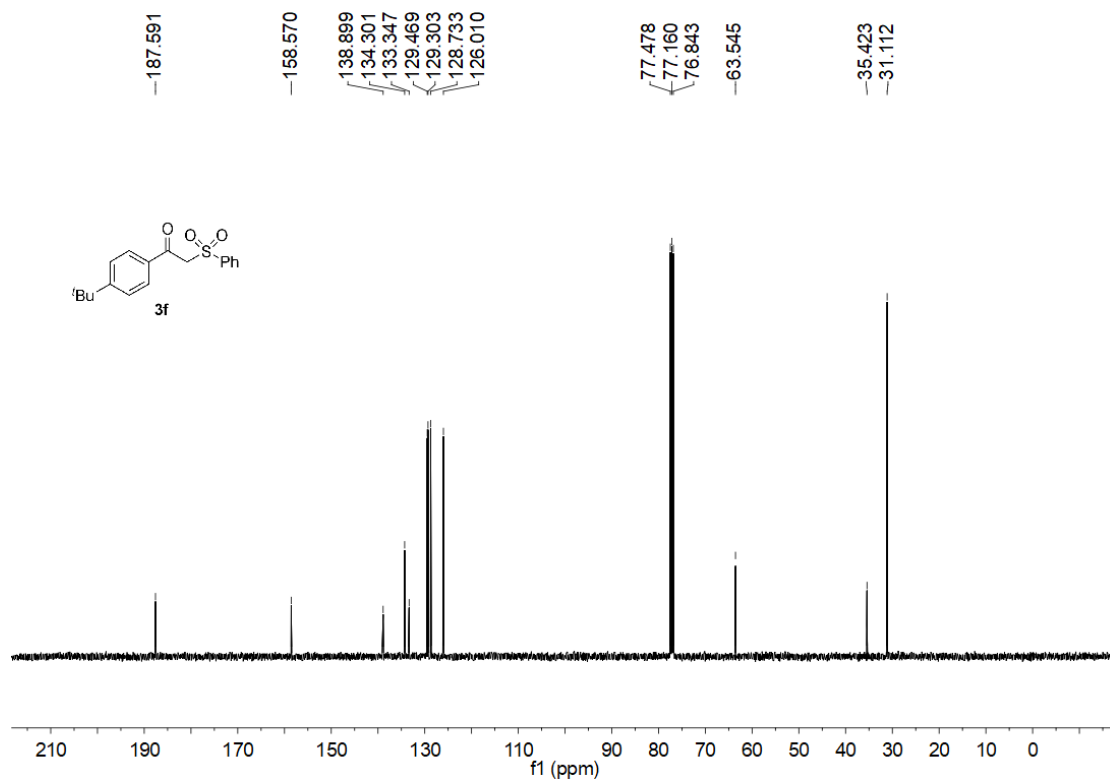

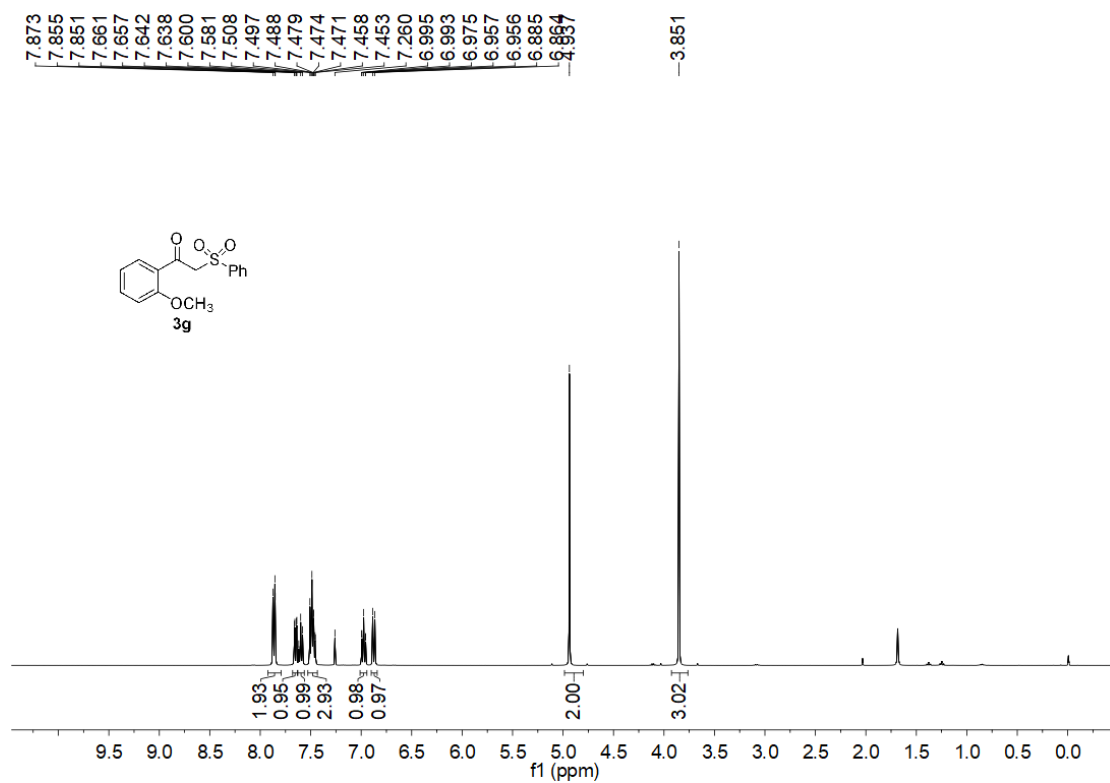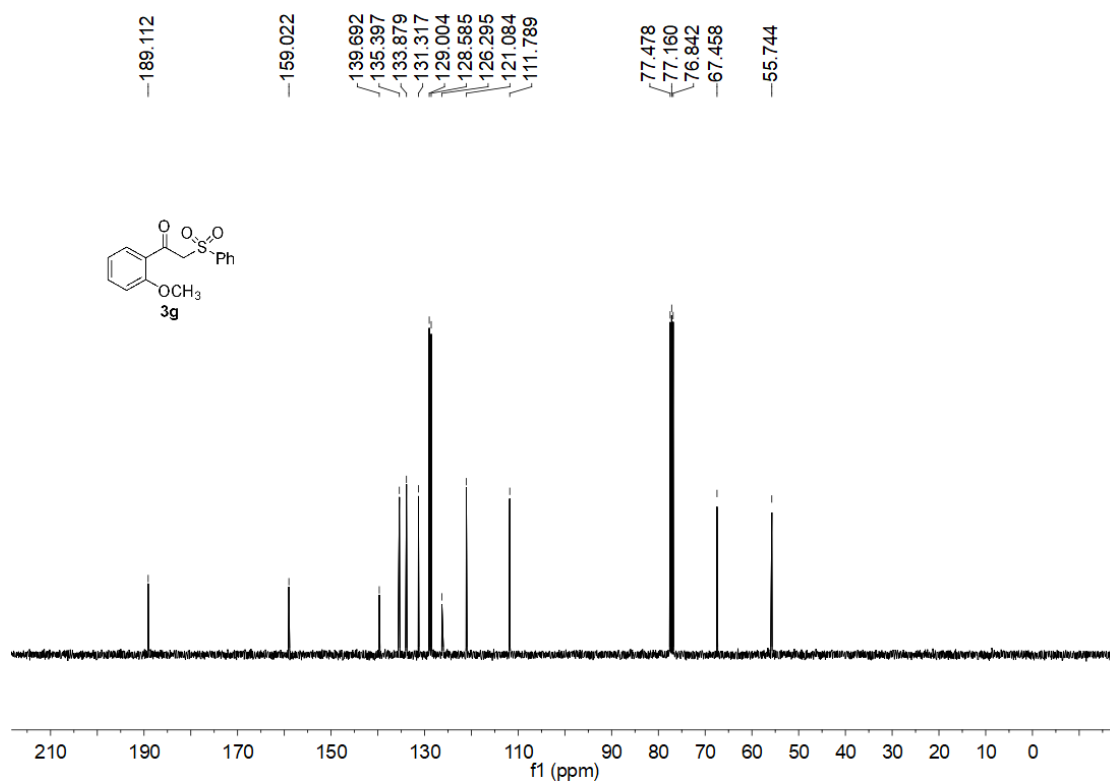

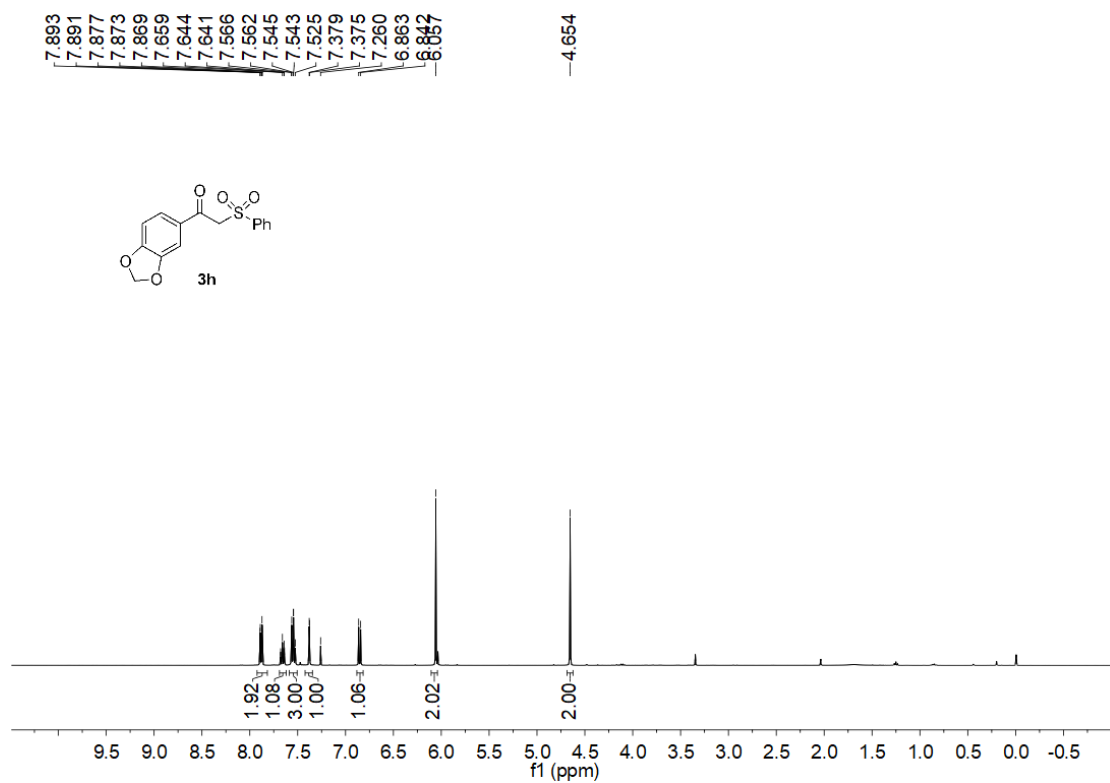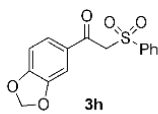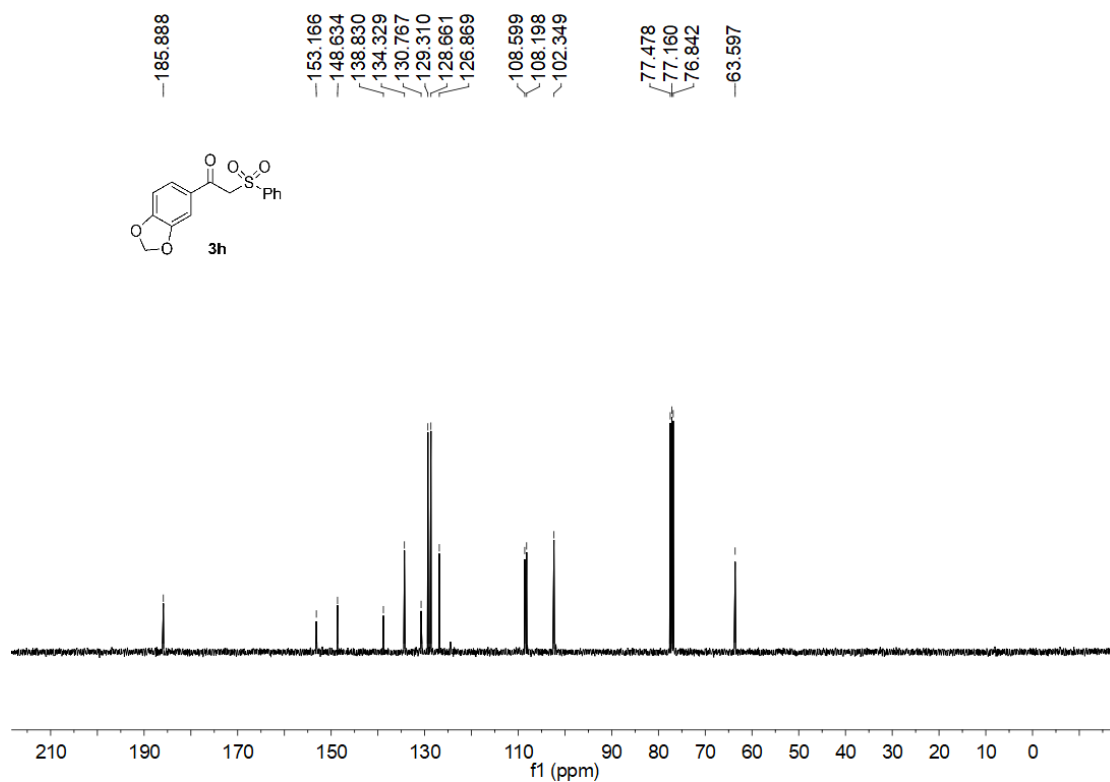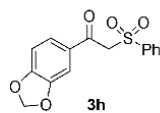



7.900  
7.898  
7.888  
7.884  
7.880  
7.876  
7.753  
7.750  
7.749  
7.747  
7.733  
7.731  
7.730  
7.727  
7.694  
7.680  
7.676  
7.671  
7.660  
7.657  
7.654  
7.621  
7.616  
7.615  
7.610  
7.597  
7.593  
7.591  
7.587  
7.576  
7.572  
7.556  
7.542  
7.538  
7.498  
7.484  
7.478  
7.464  
7.458  
7.444  
7.343  
7.341  
7.337  
7.334  
7.323  
7.321  
7.316  
7.314  
7.302  
7.260  
4.714

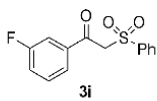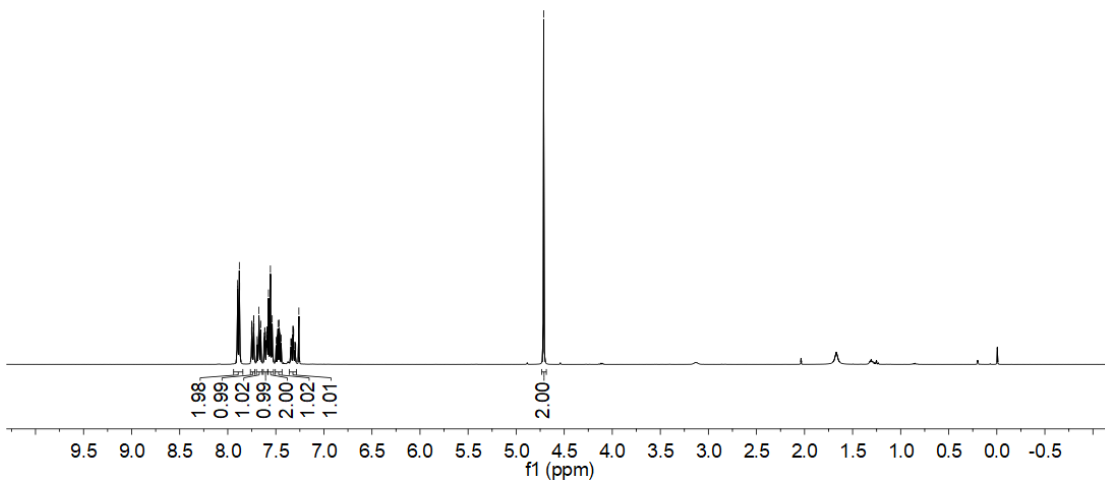

187.046  
187.024  
164.155  
161.680  
138.672  
137.856  
137.792  
134.525  
130.773  
130.698  
129.423  
128.682  
125.426  
125.395  
121.743  
121.530  
116.034  
115.806  
77.478  
77.160  
76.843  
63.706

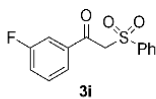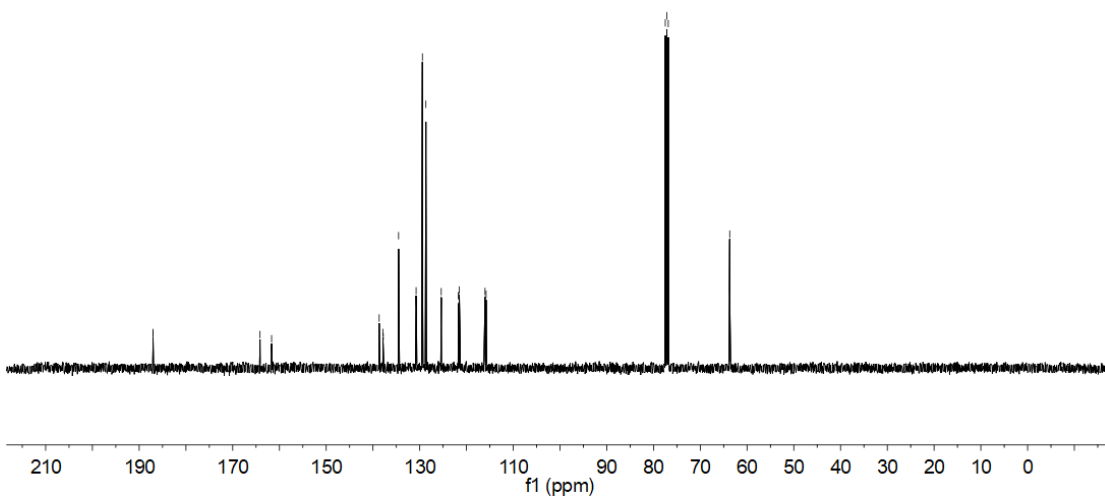

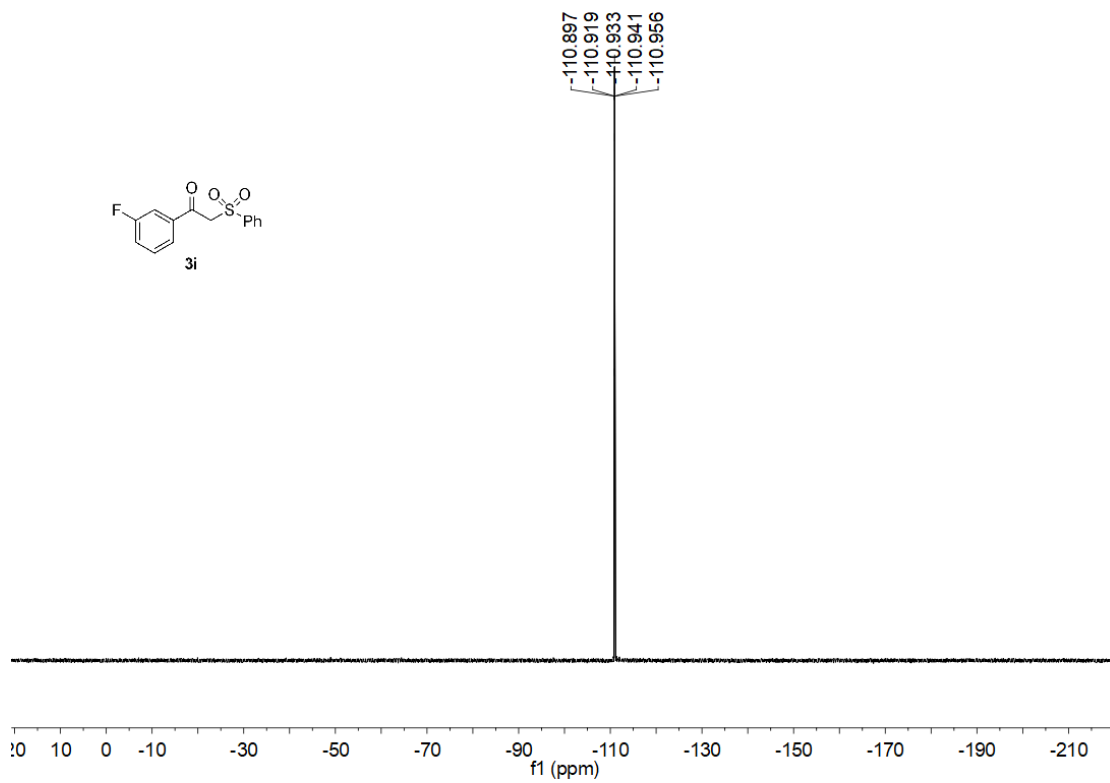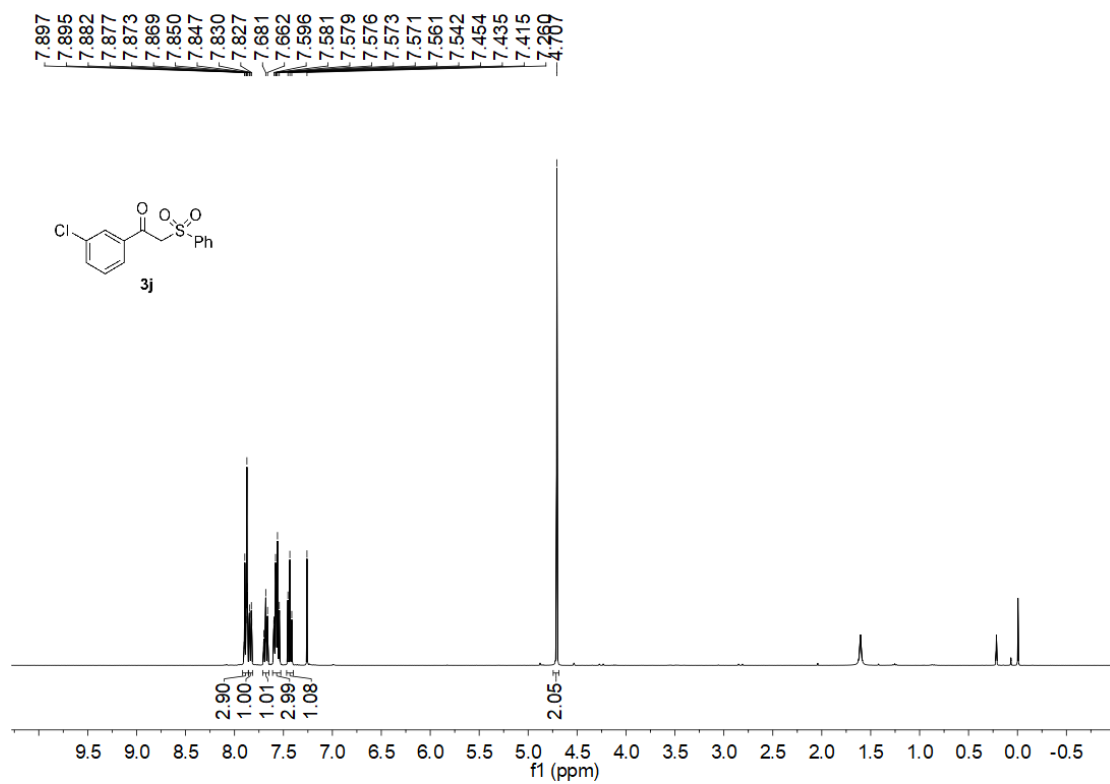

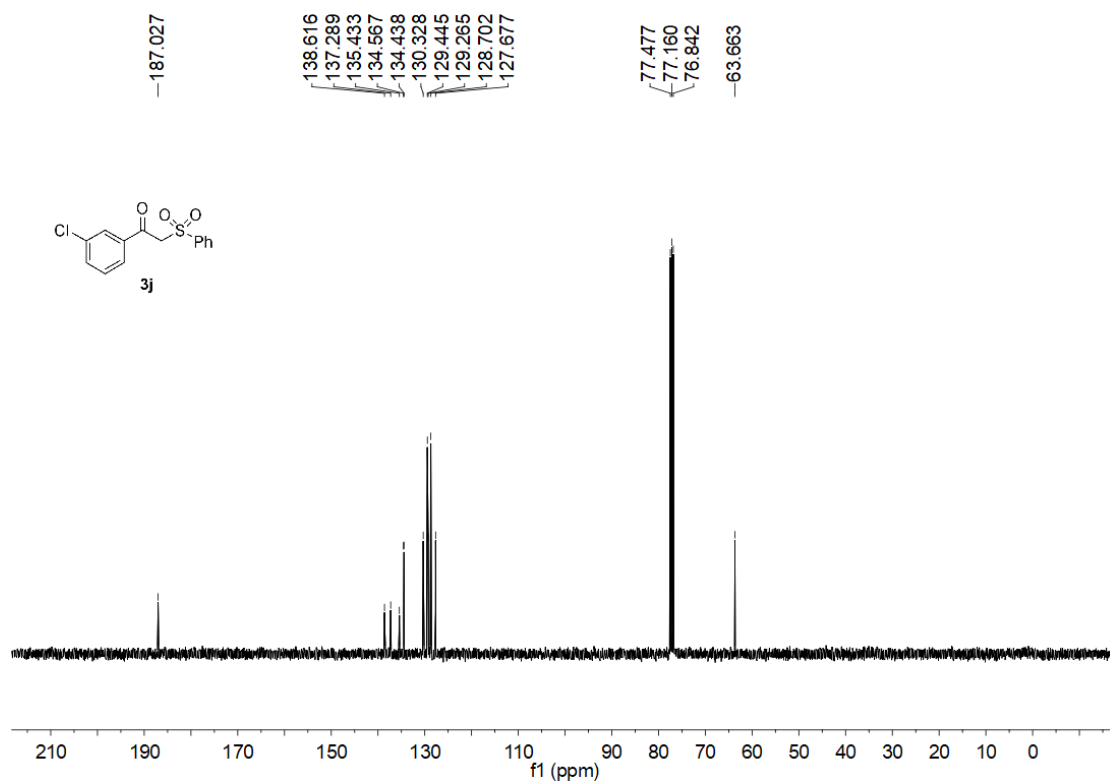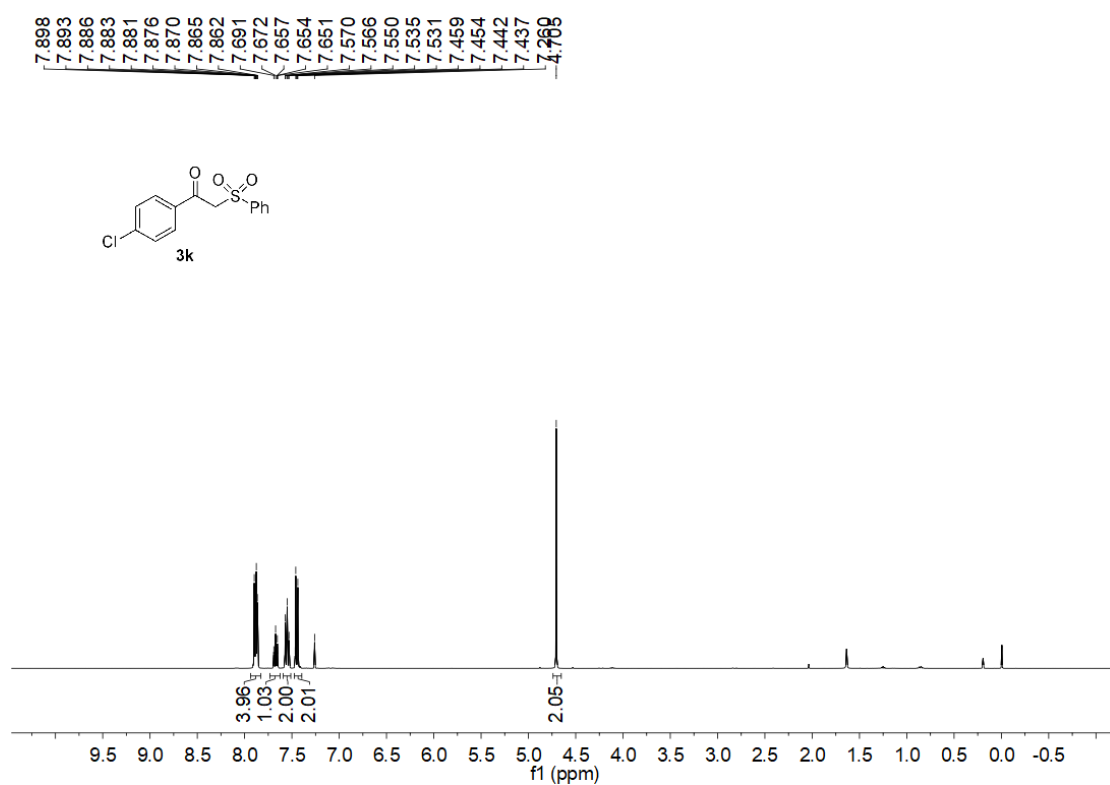

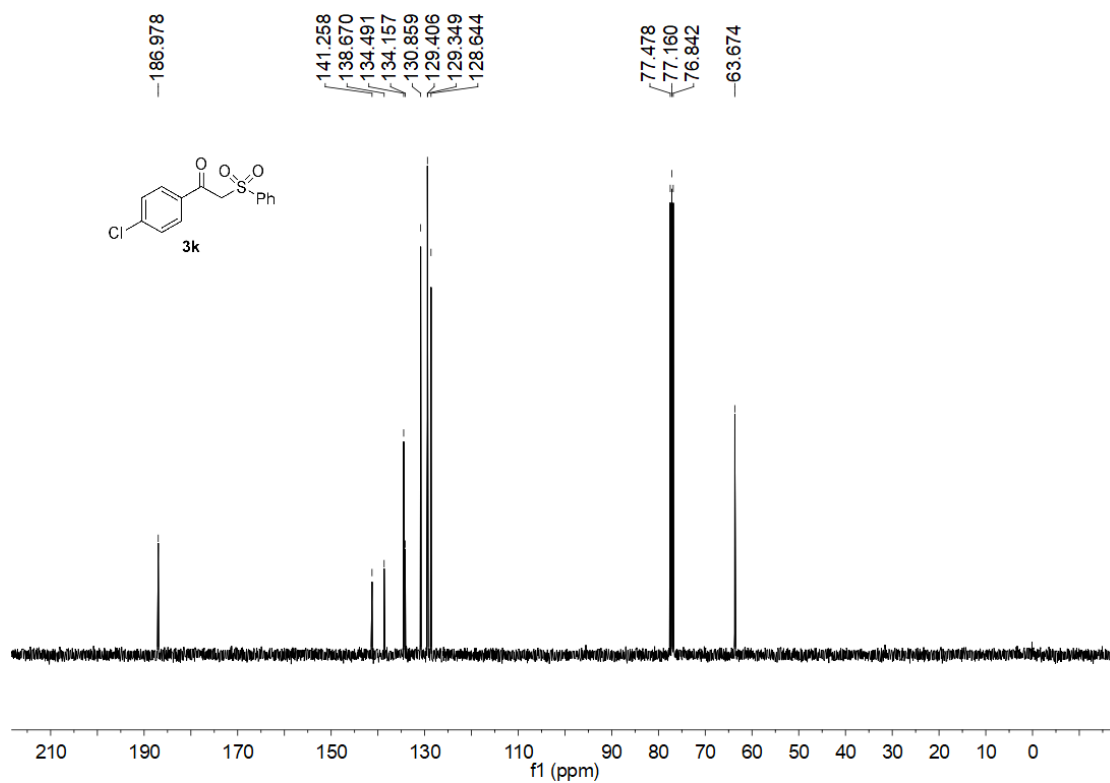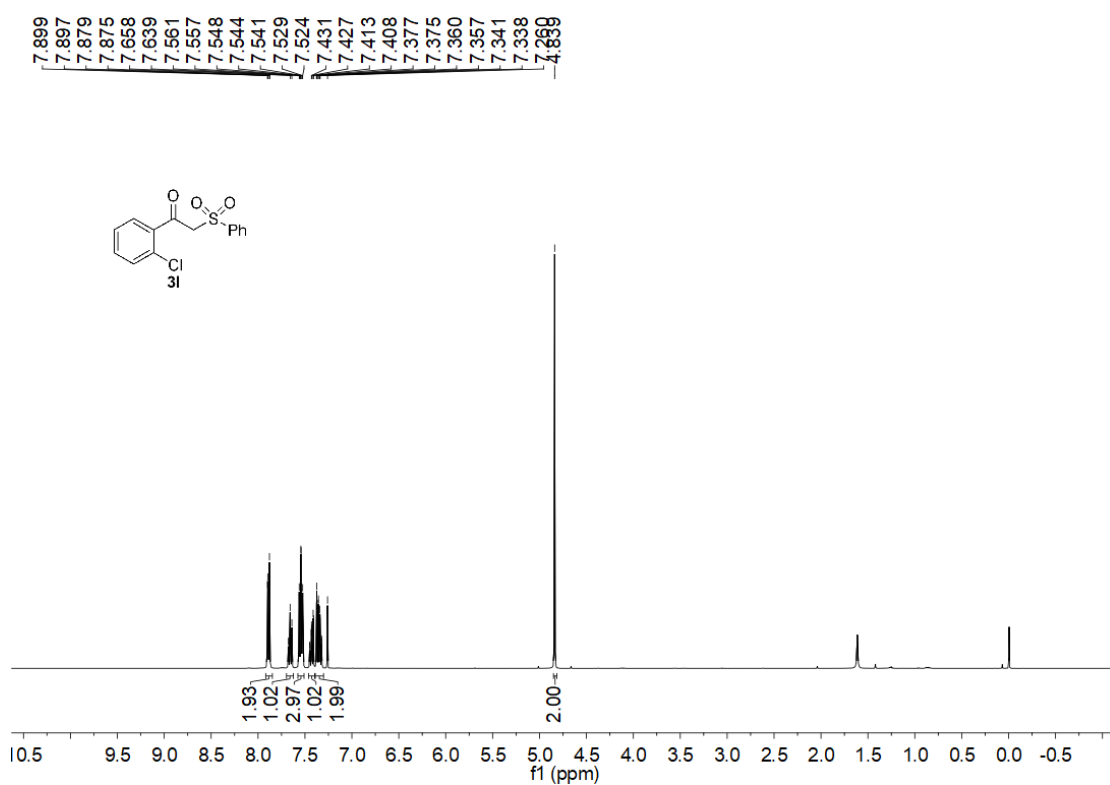

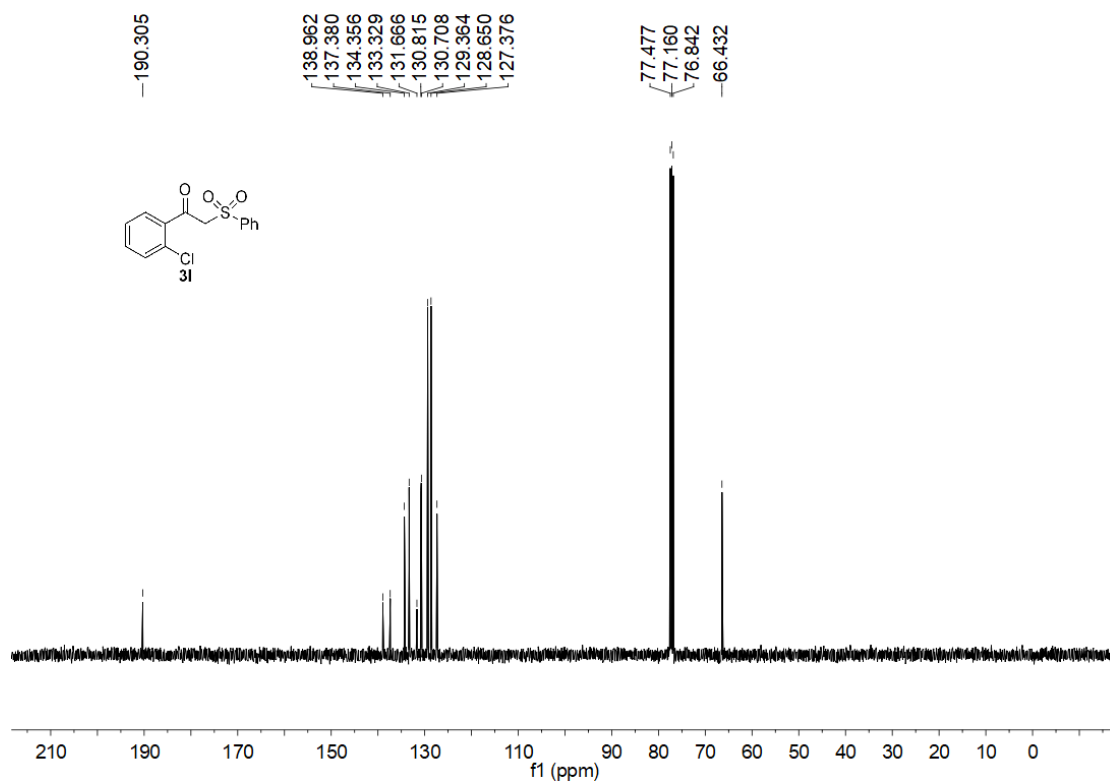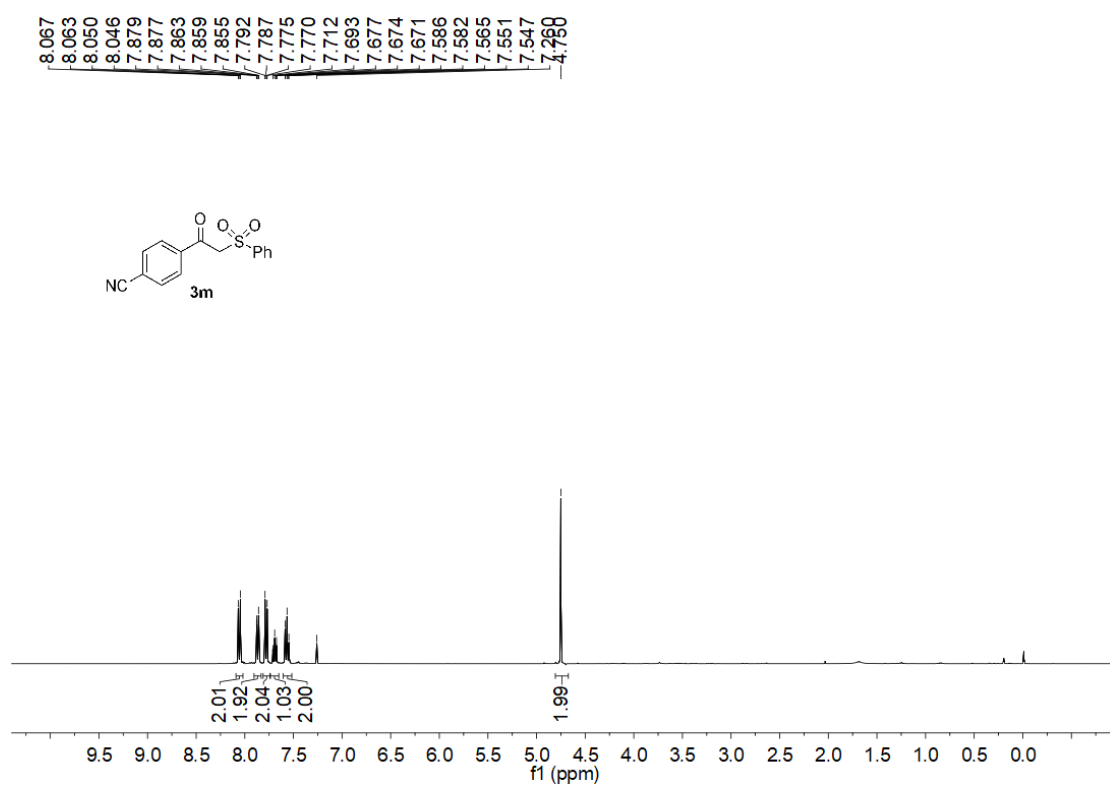

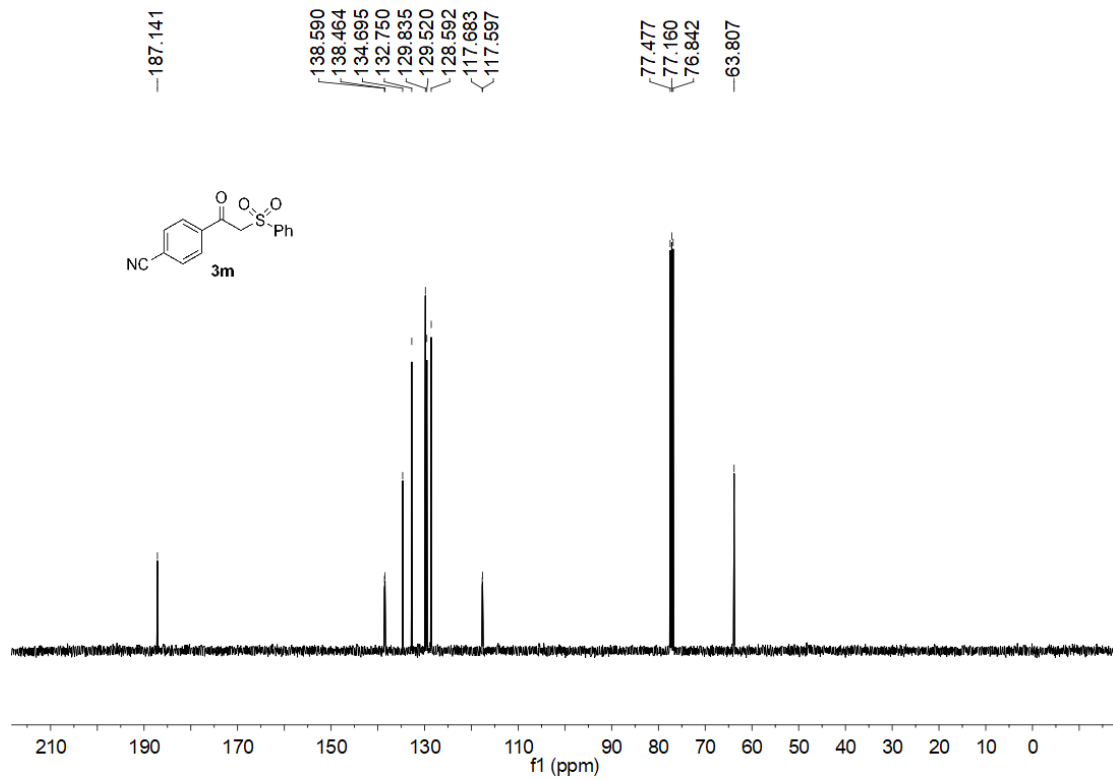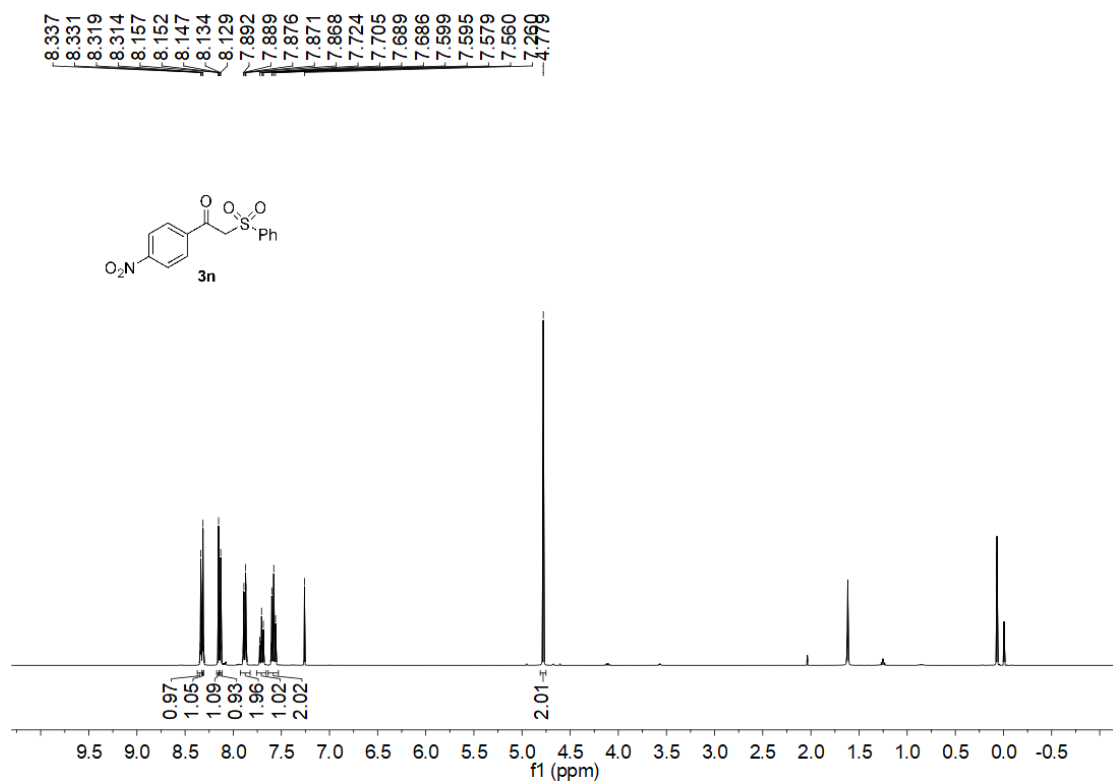

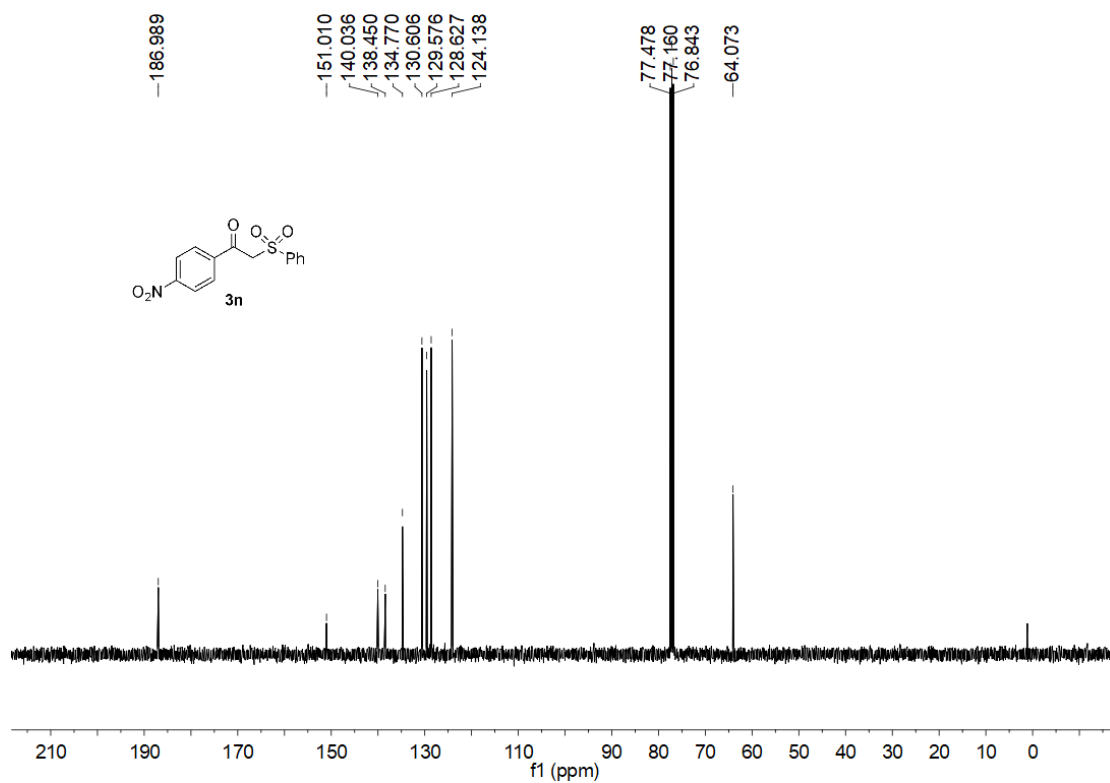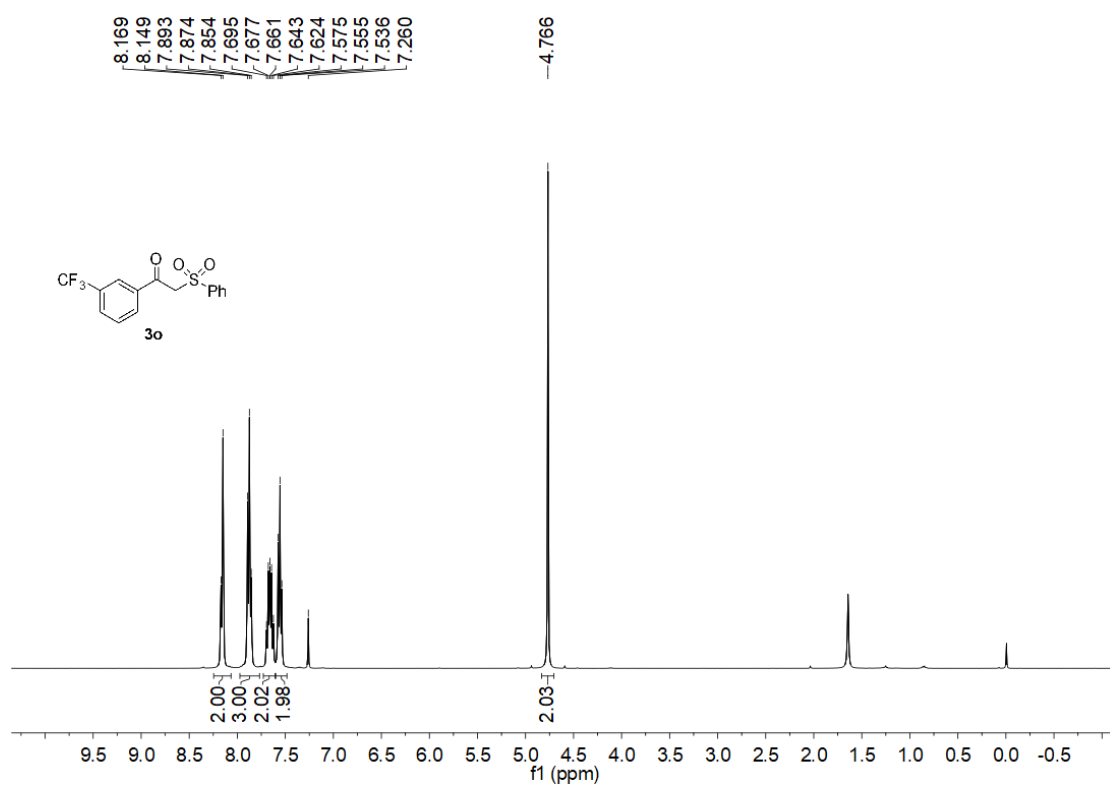

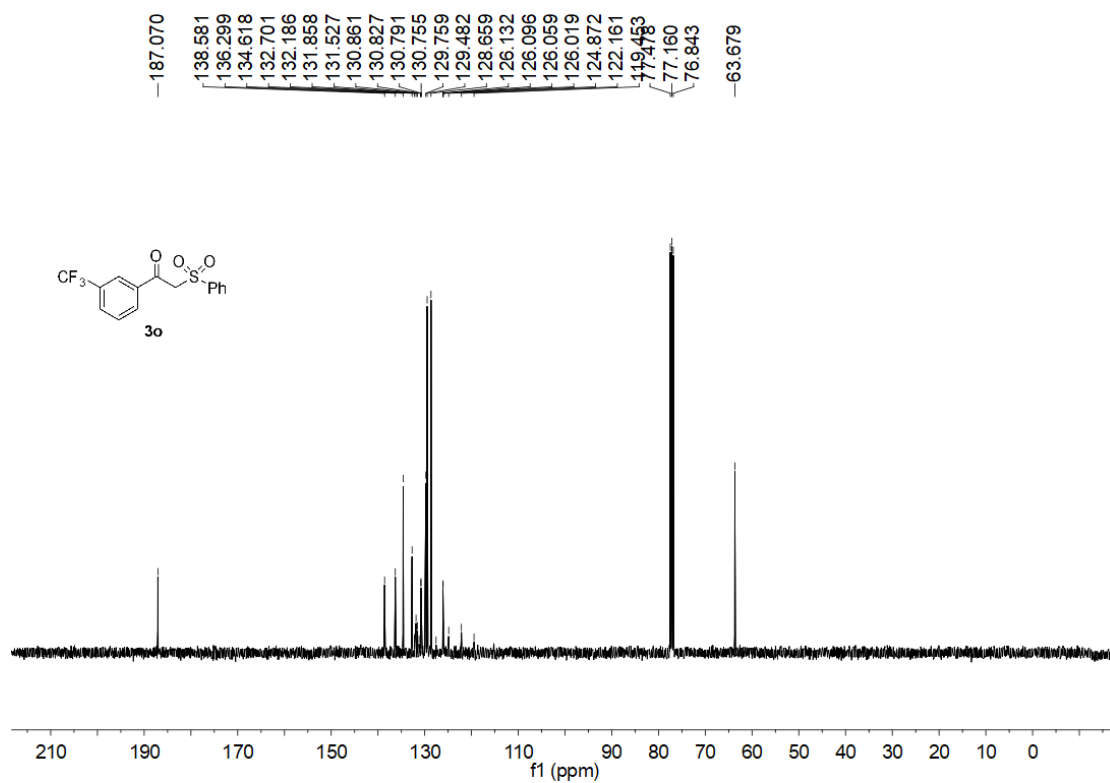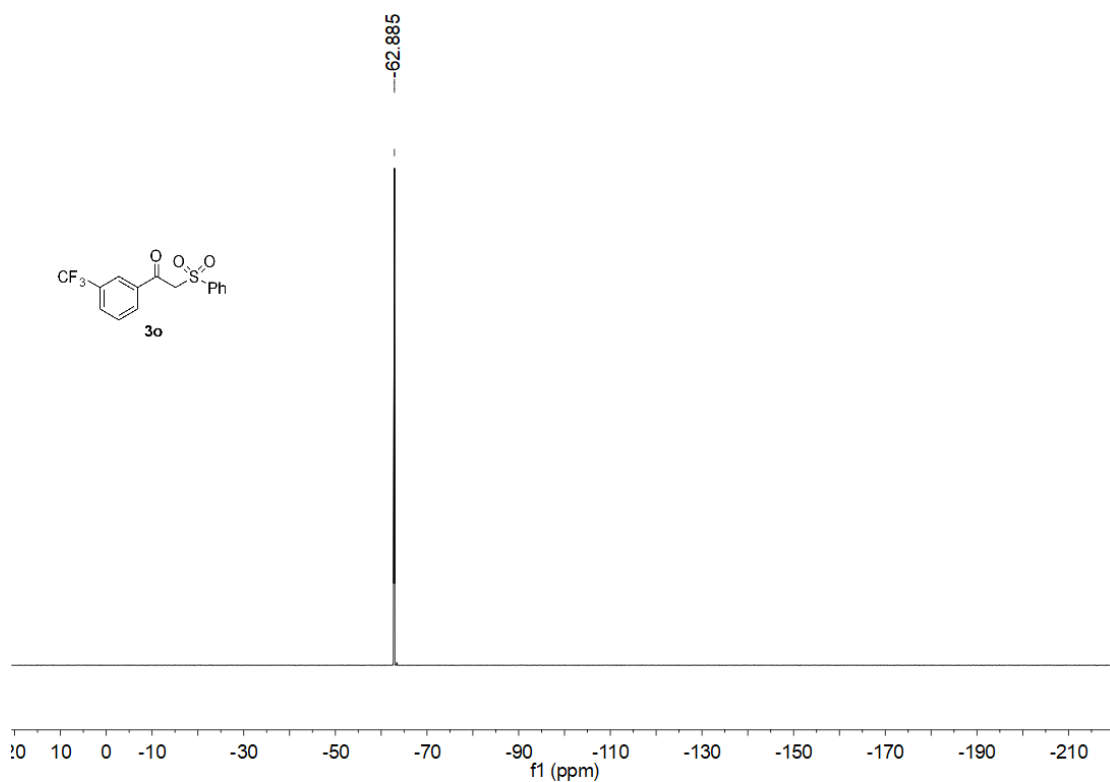



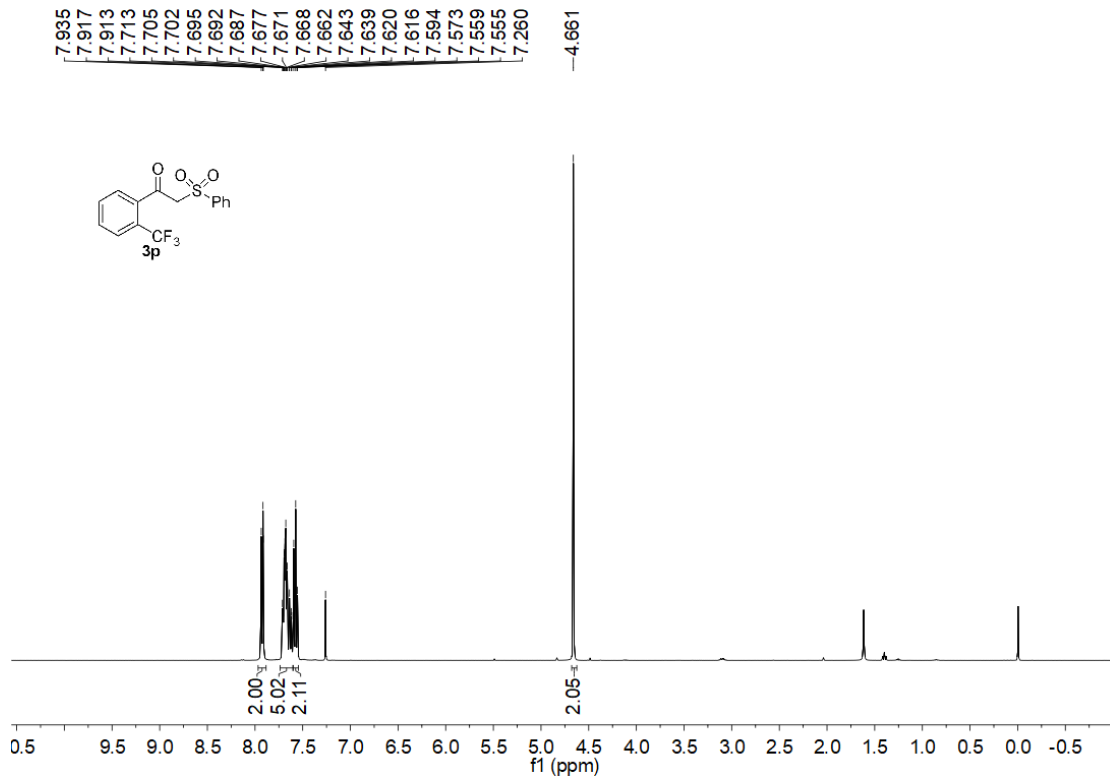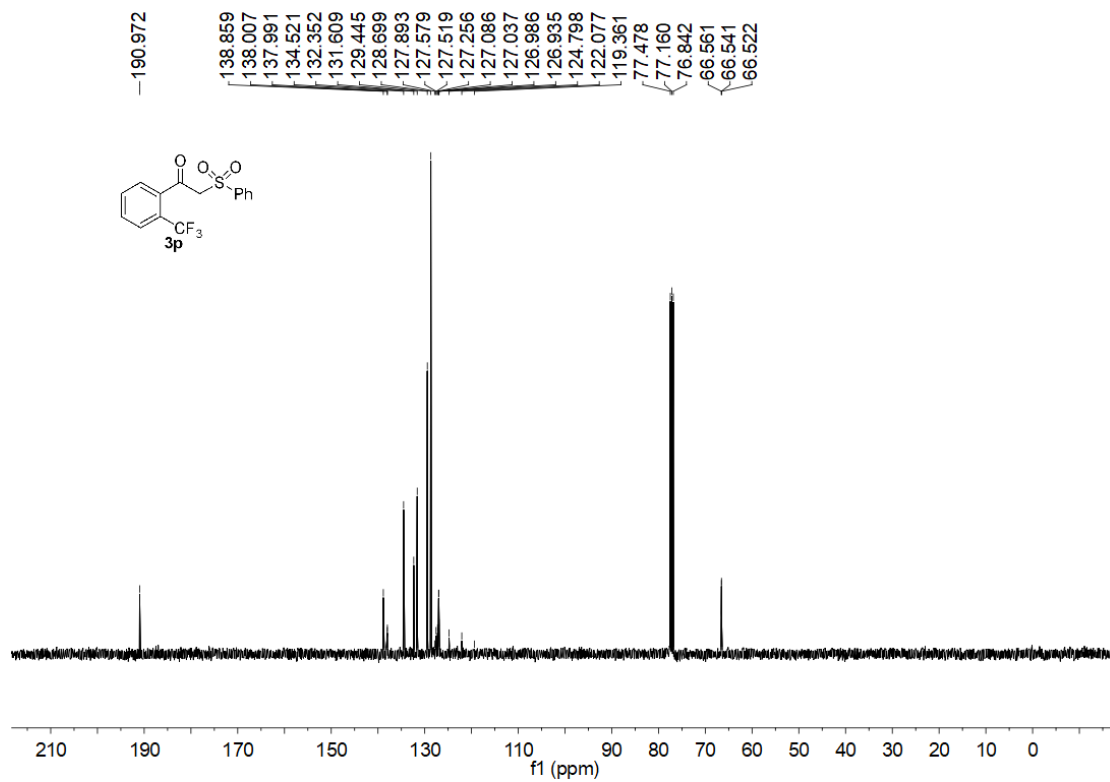

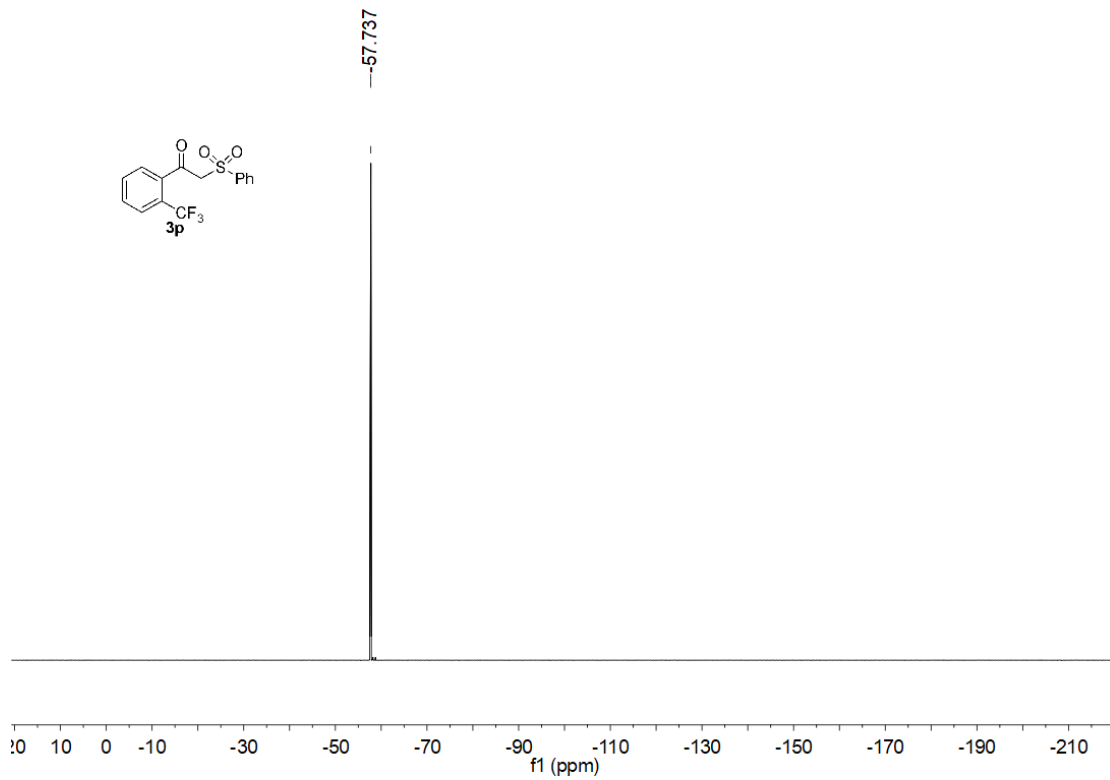

8.459  
7.941  
7.937  
7.928  
7.926  
7.908  
7.904  
7.888  
7.859  
7.841  
7.638  
7.622  
7.620  
7.552  
4.876

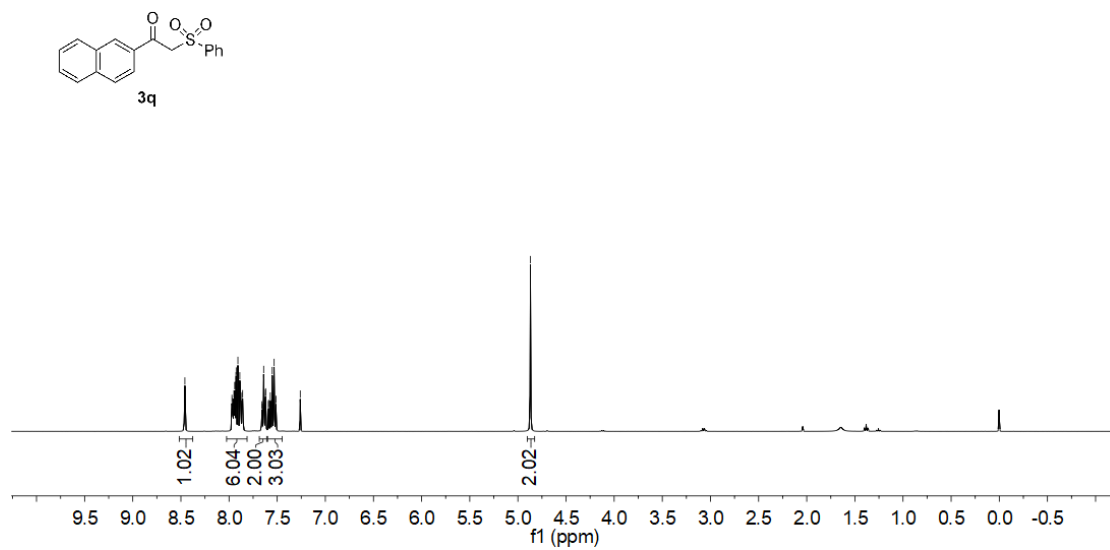

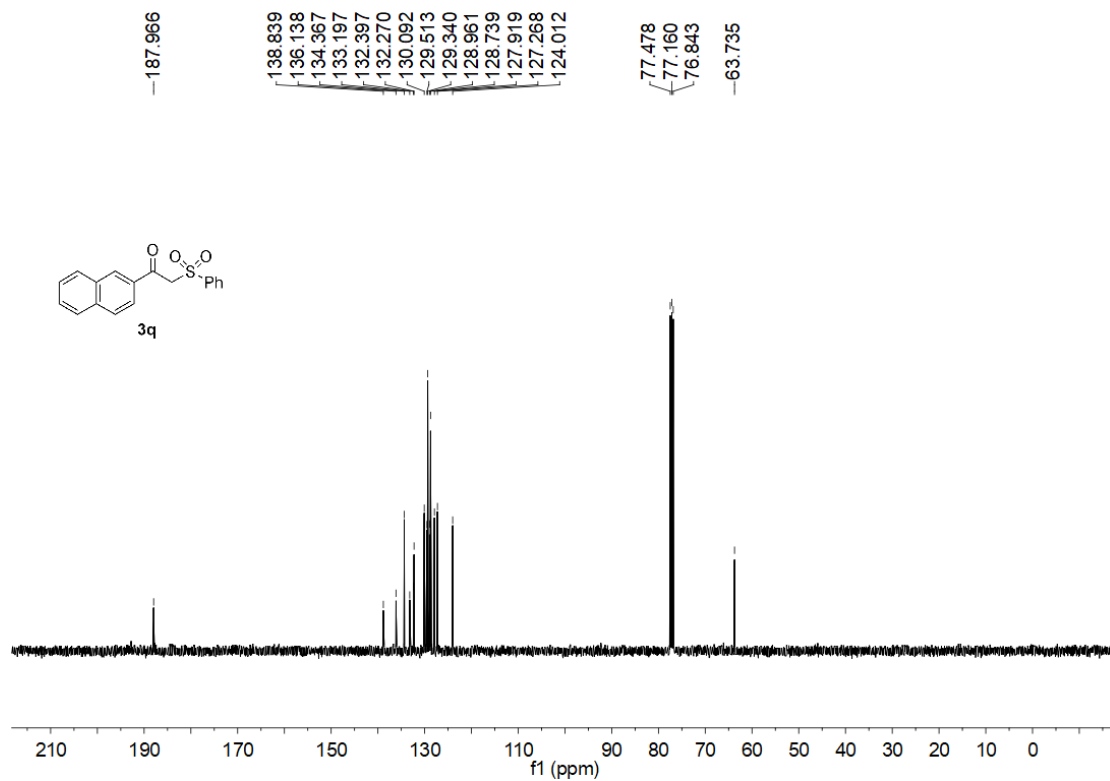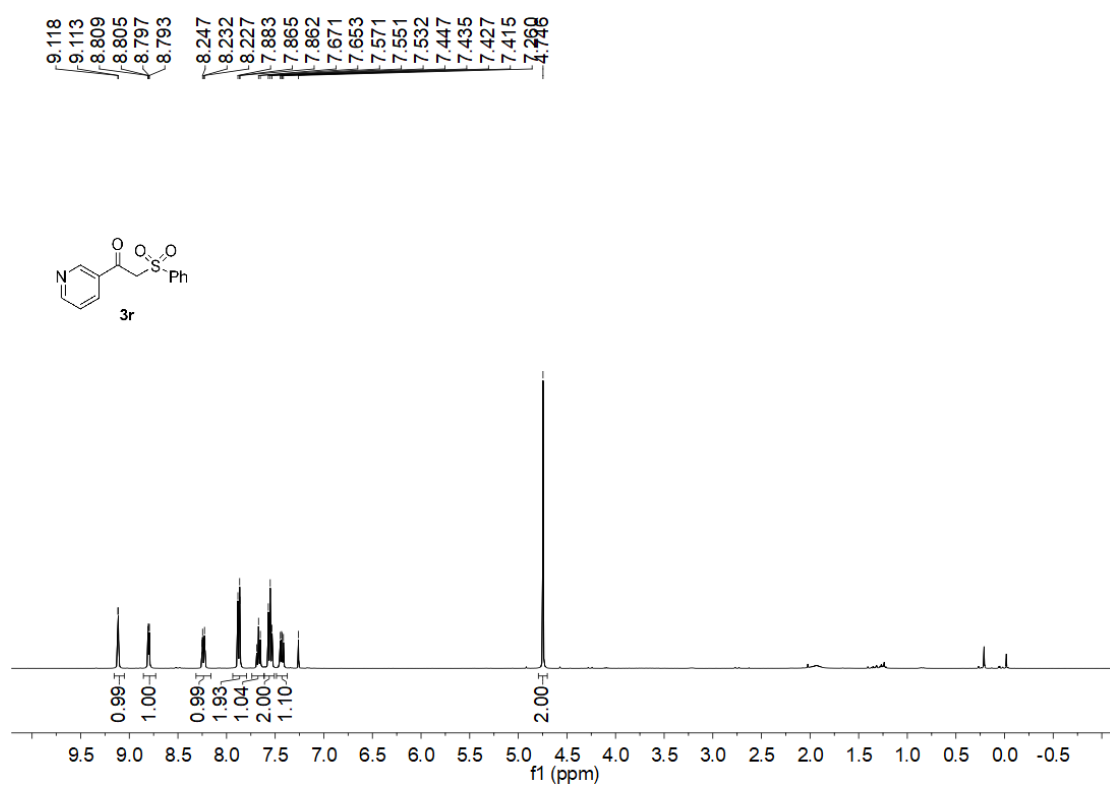

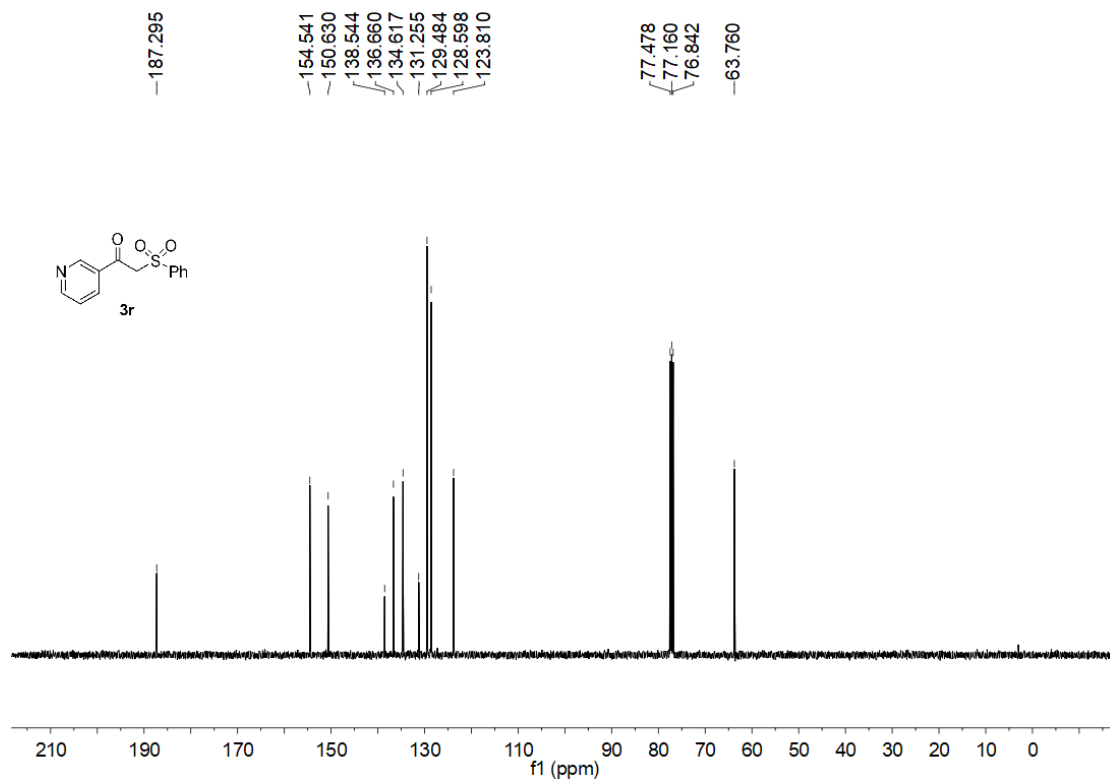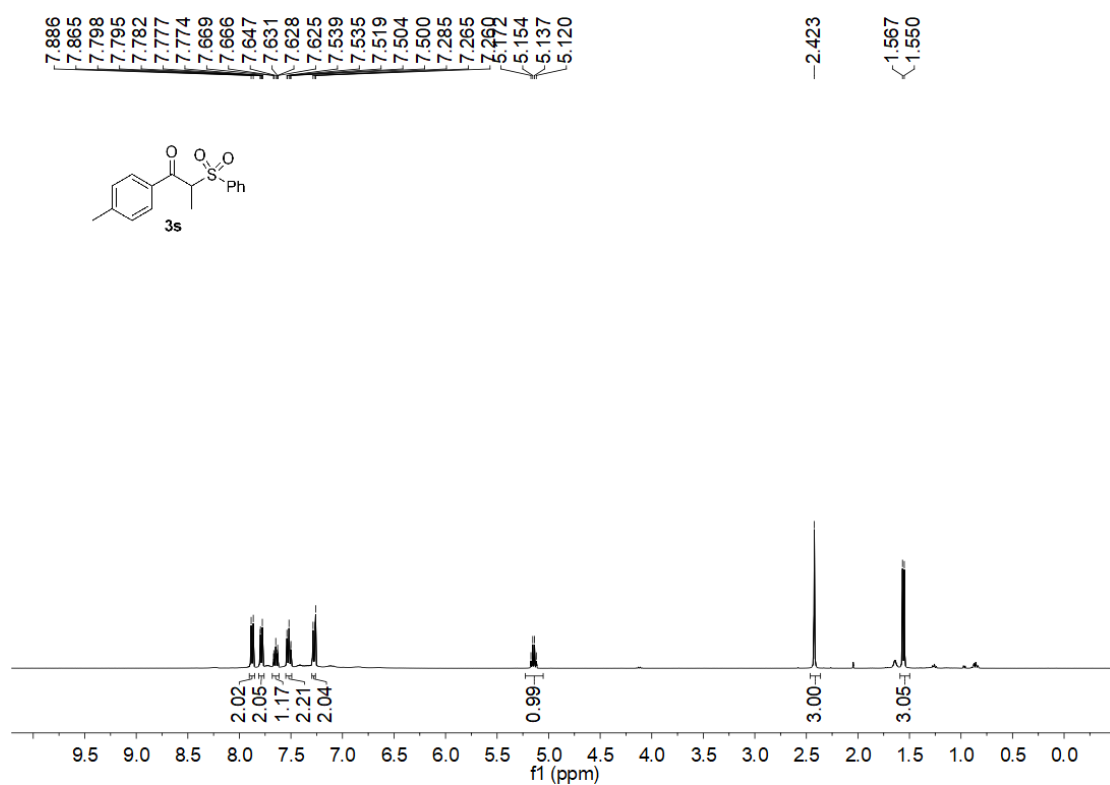

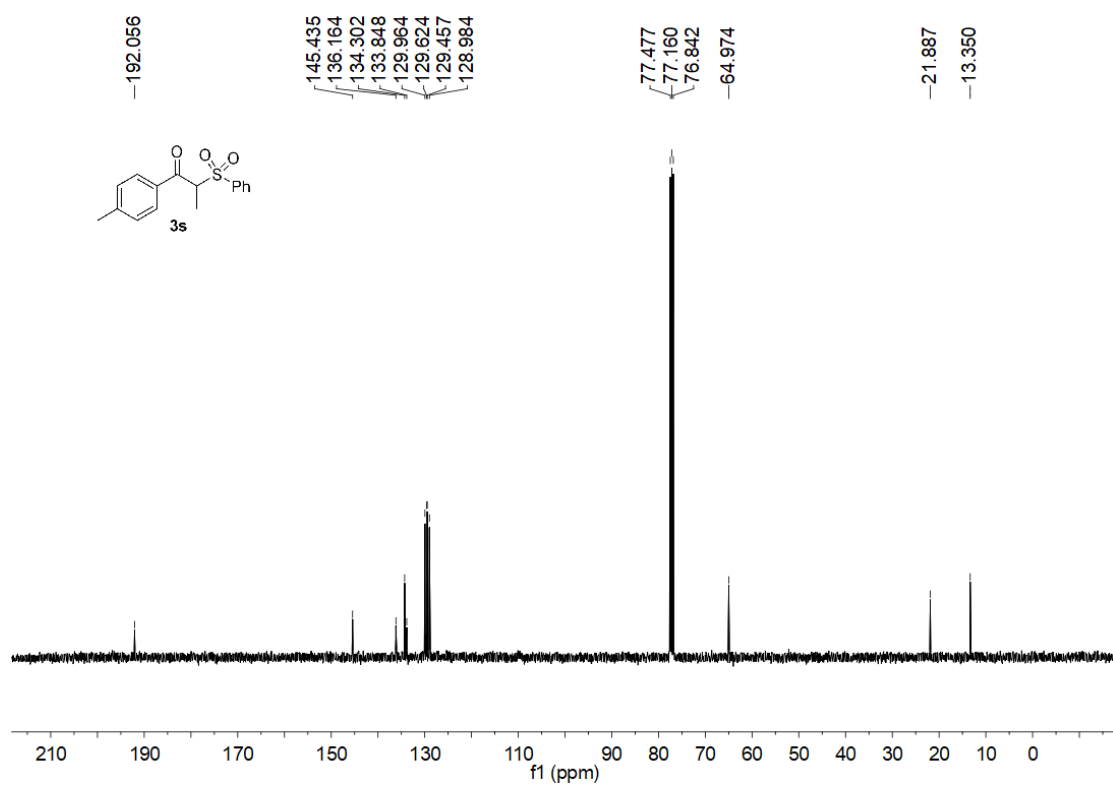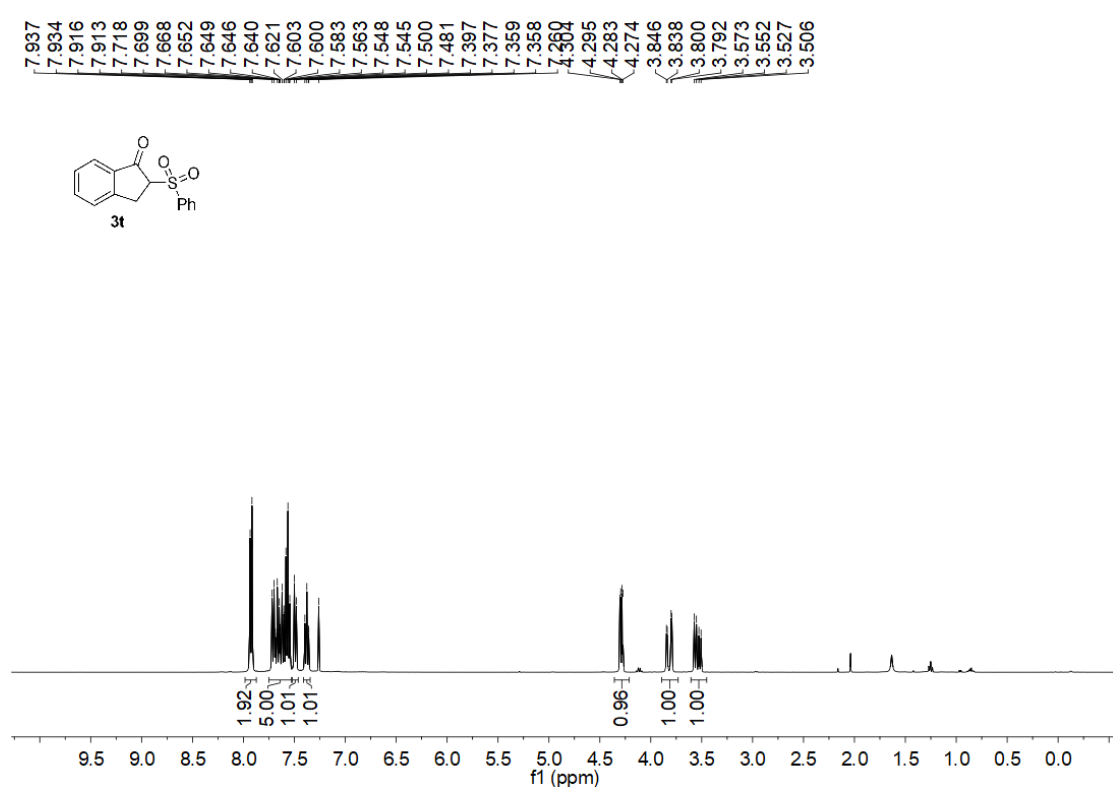

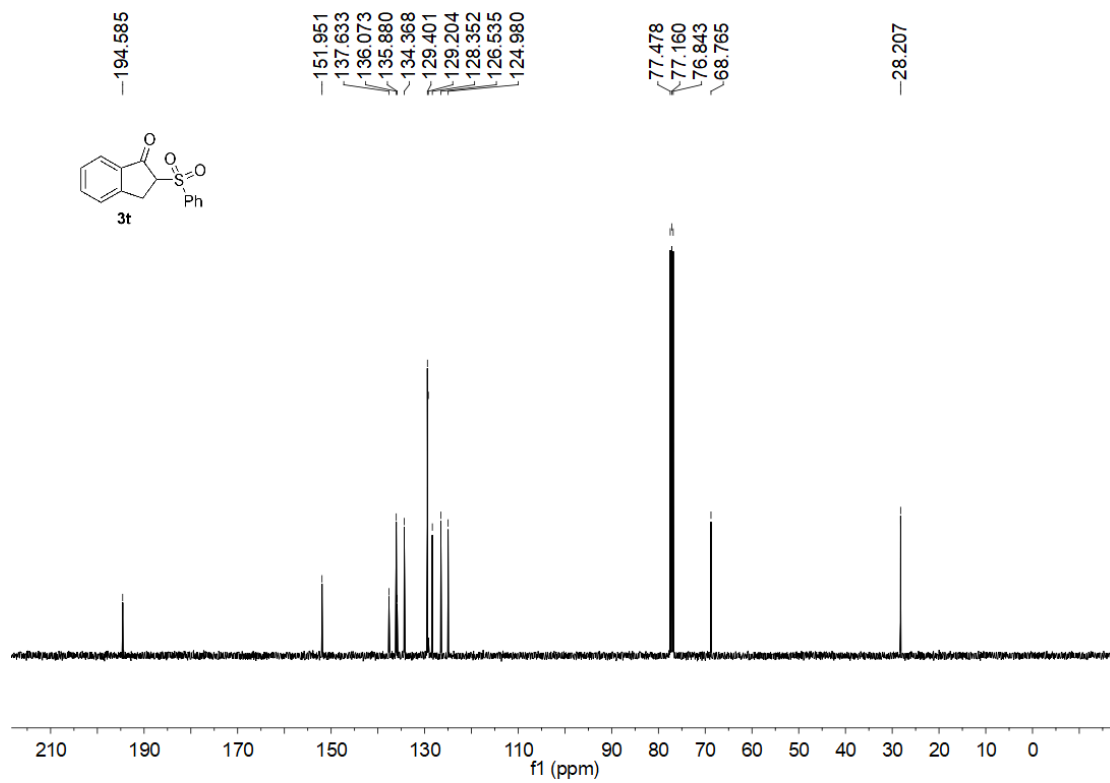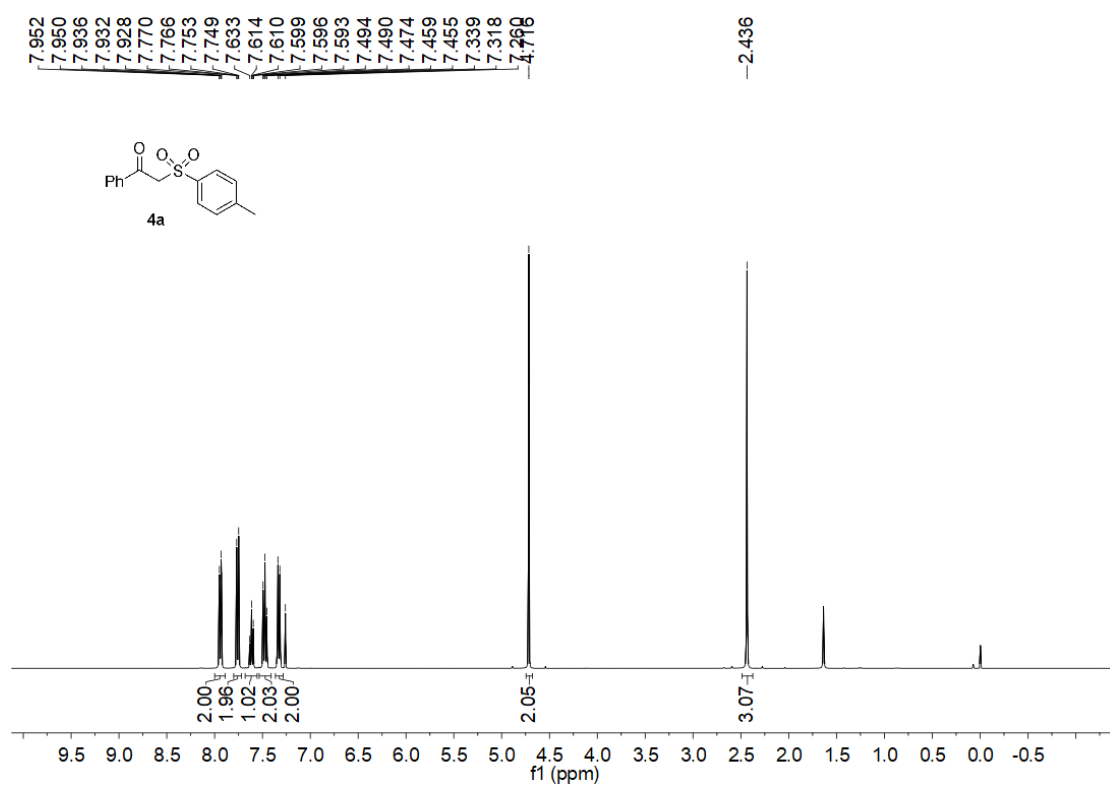

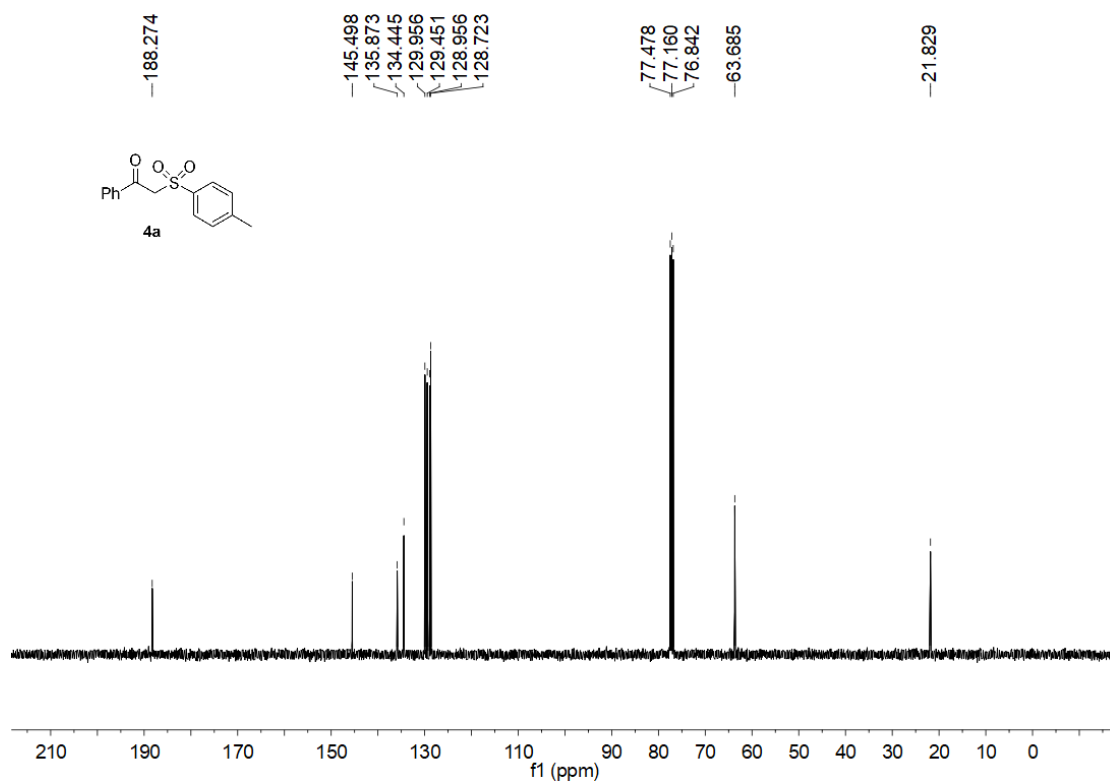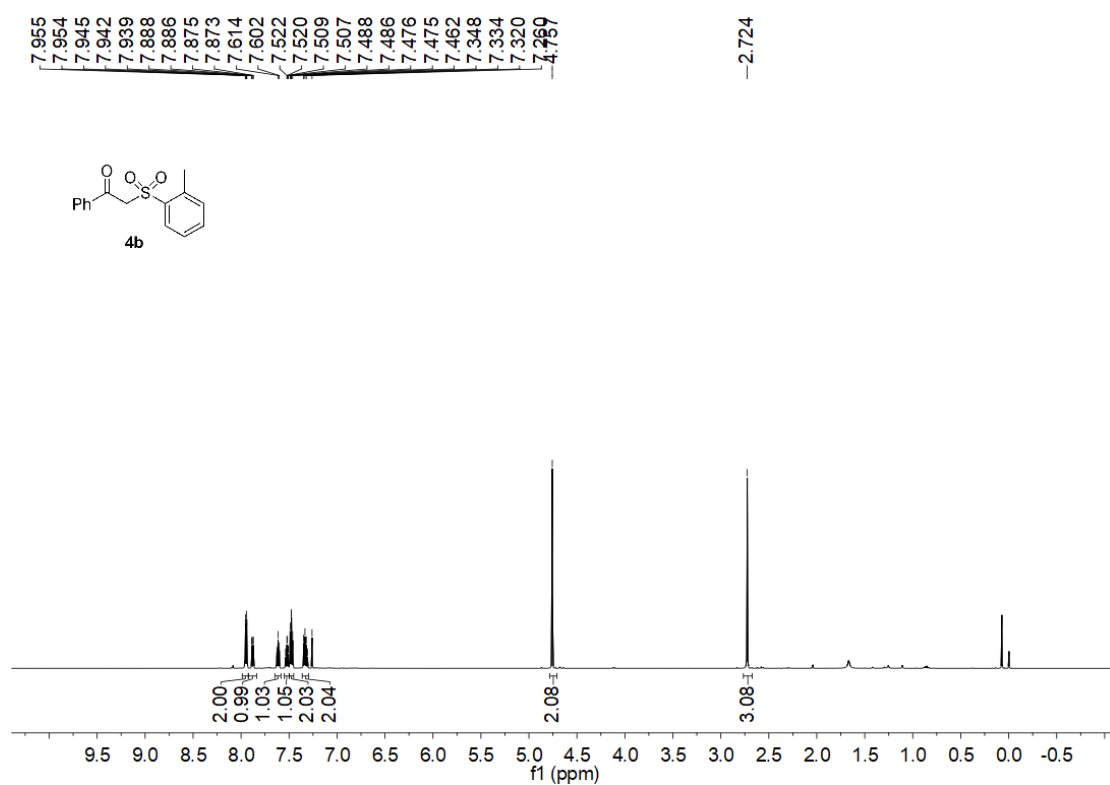

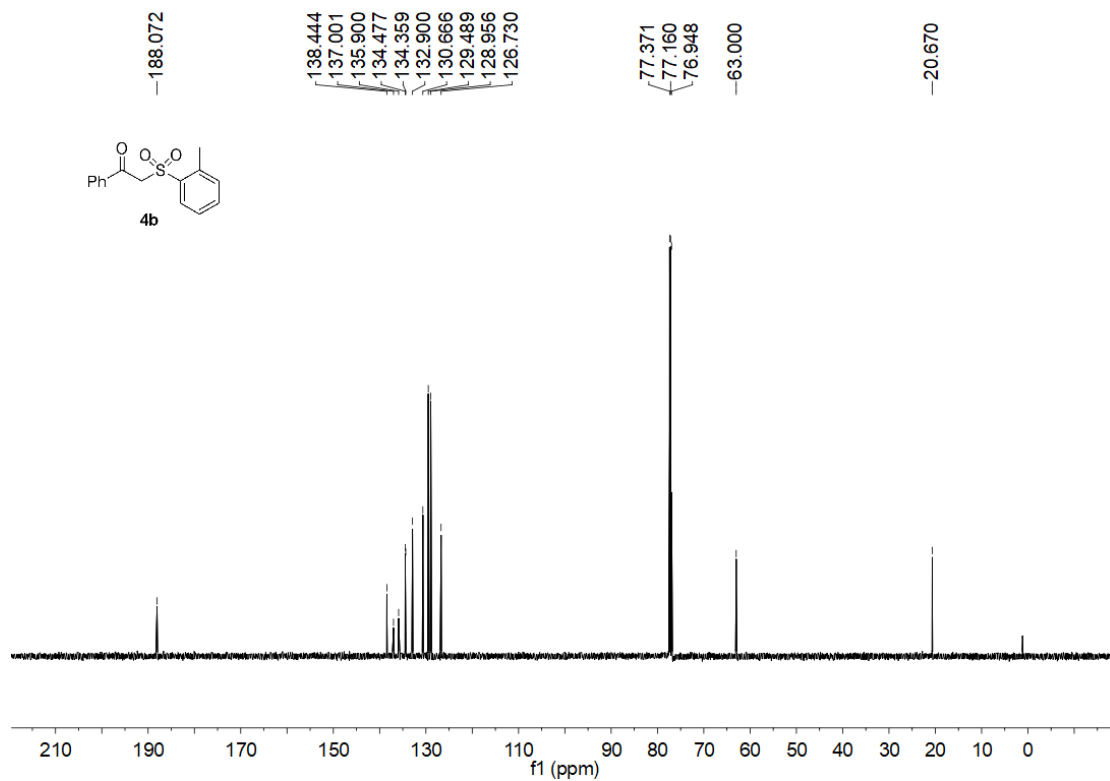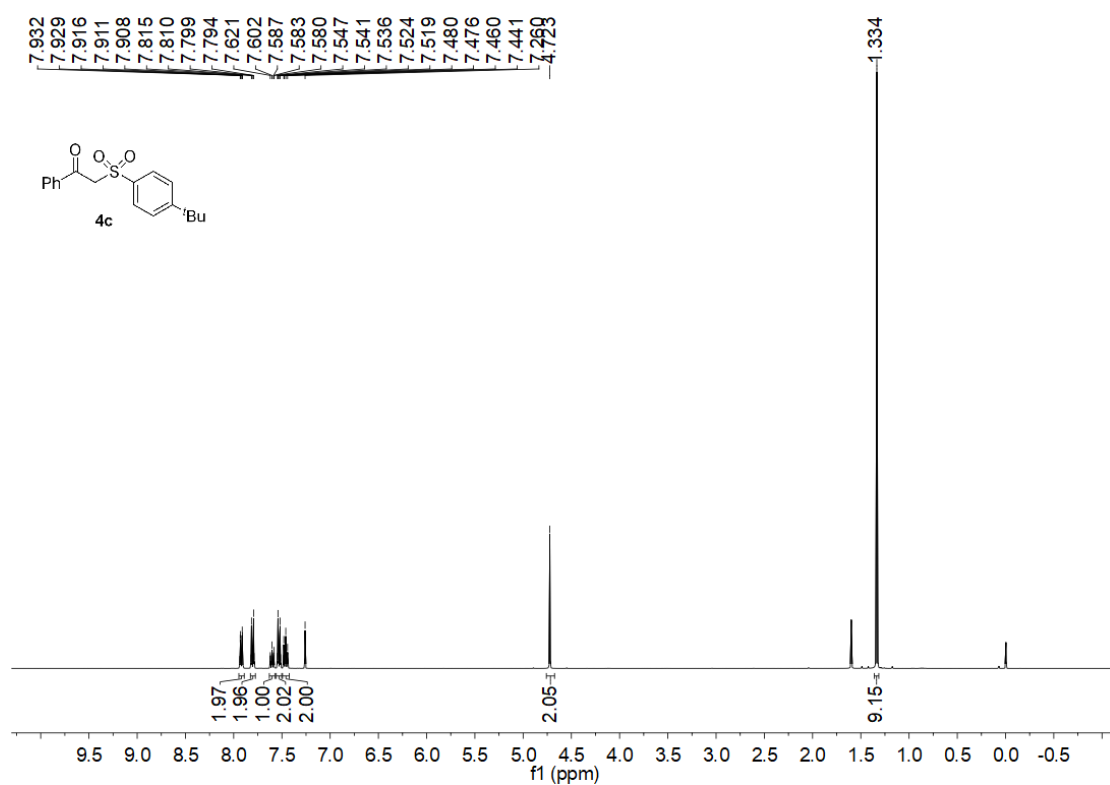



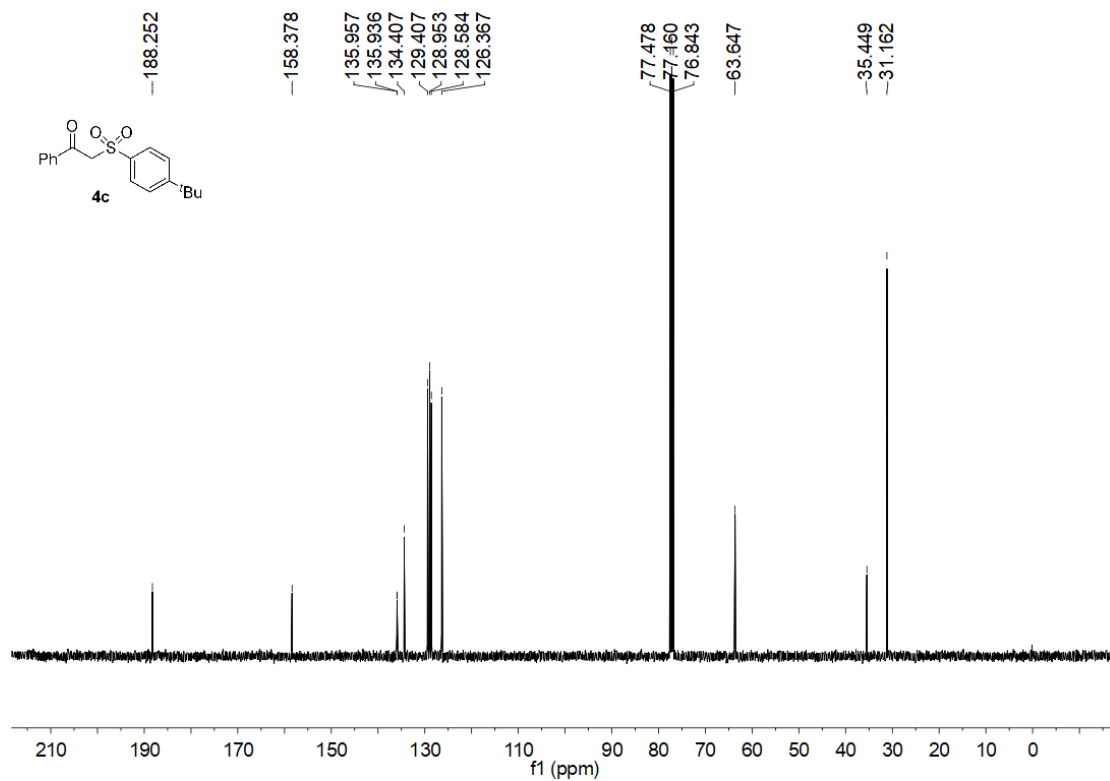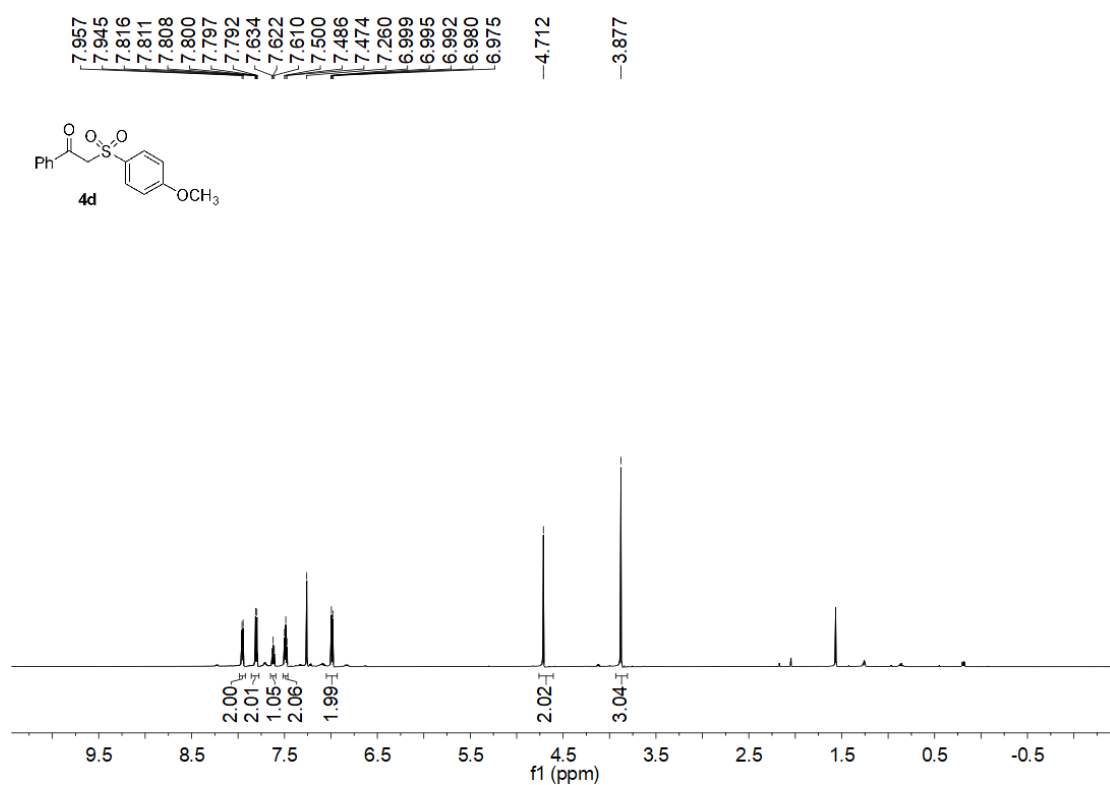

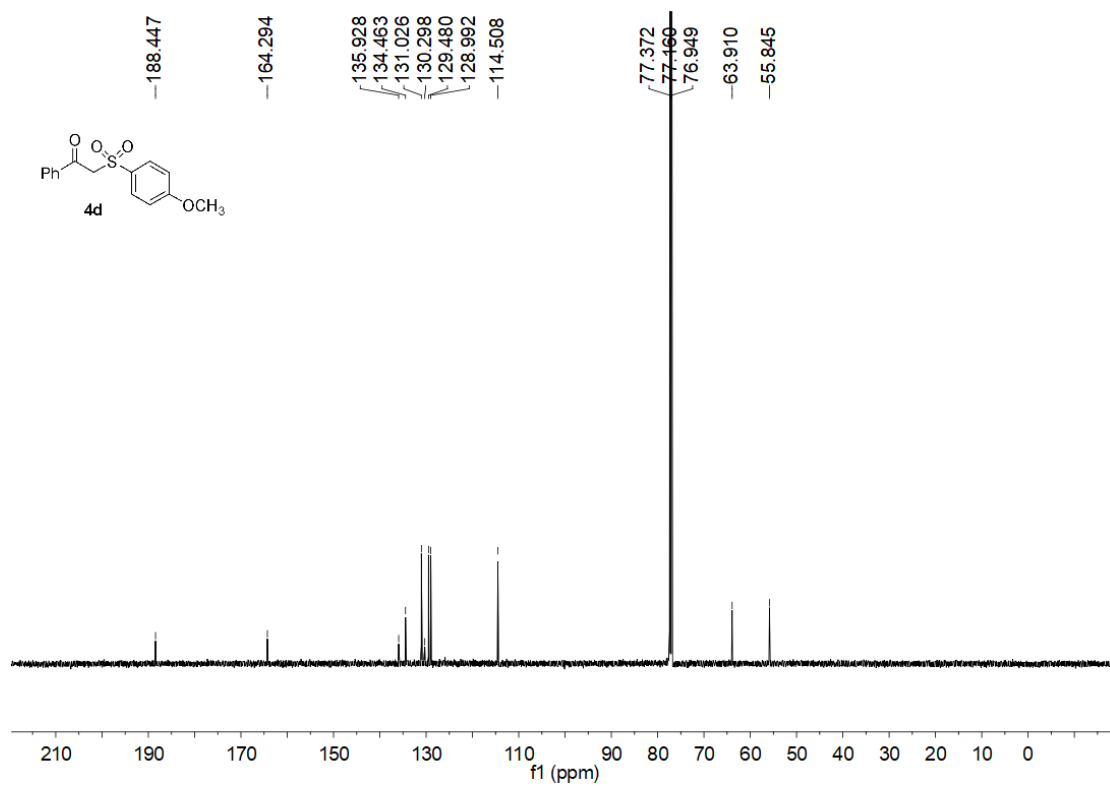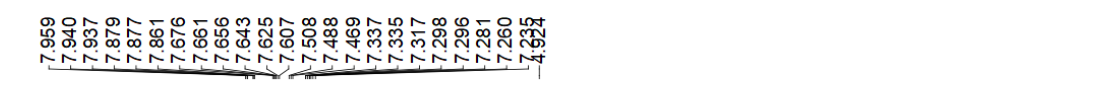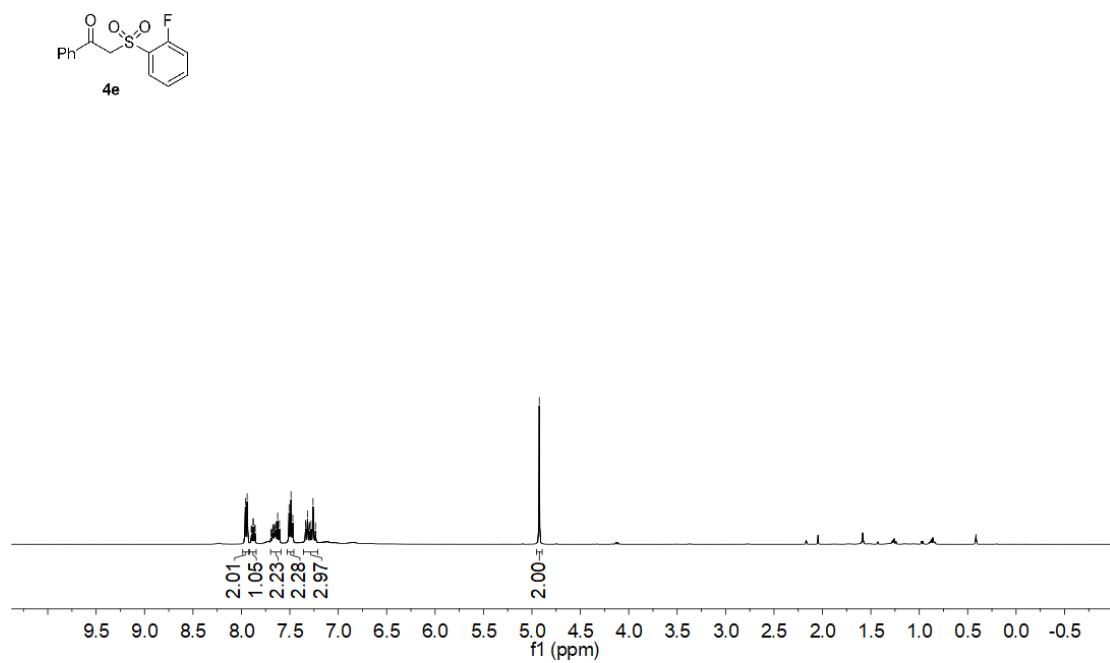

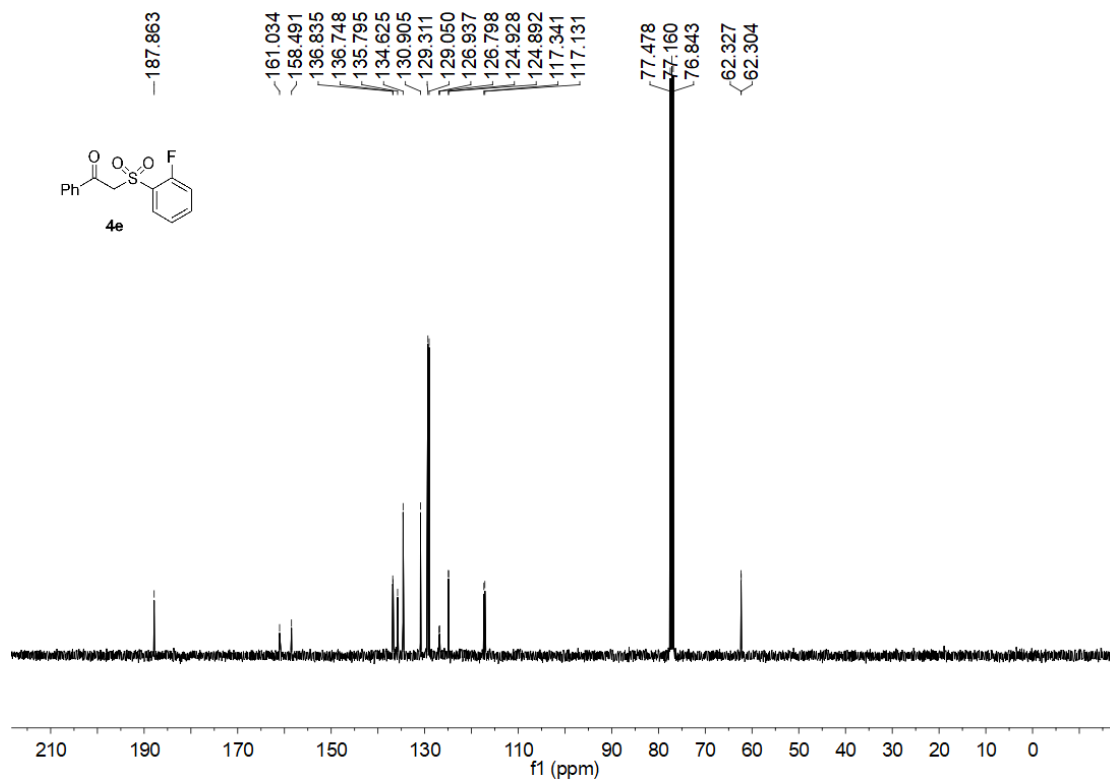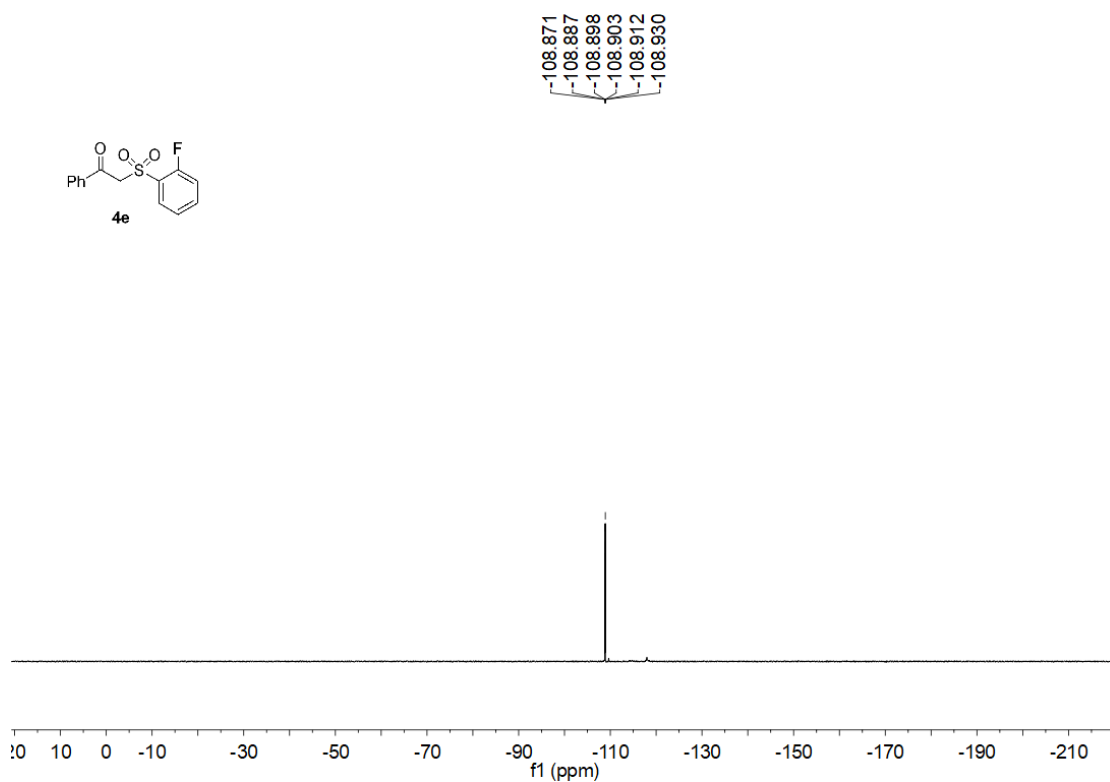

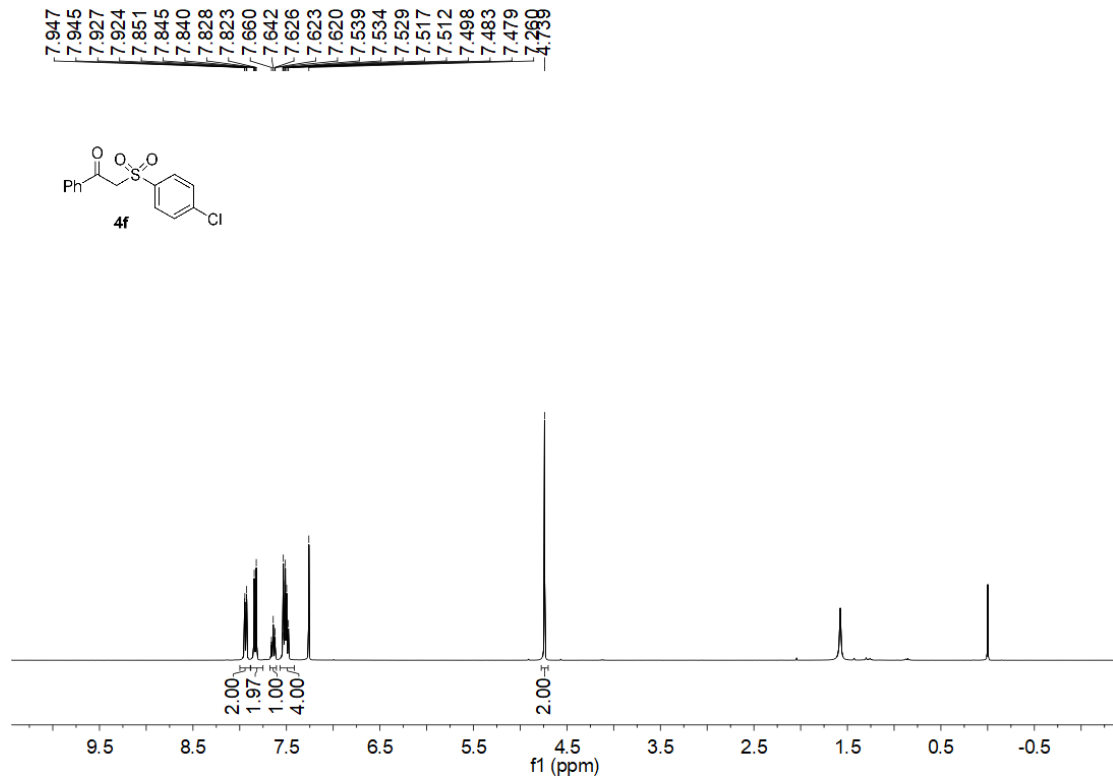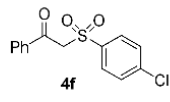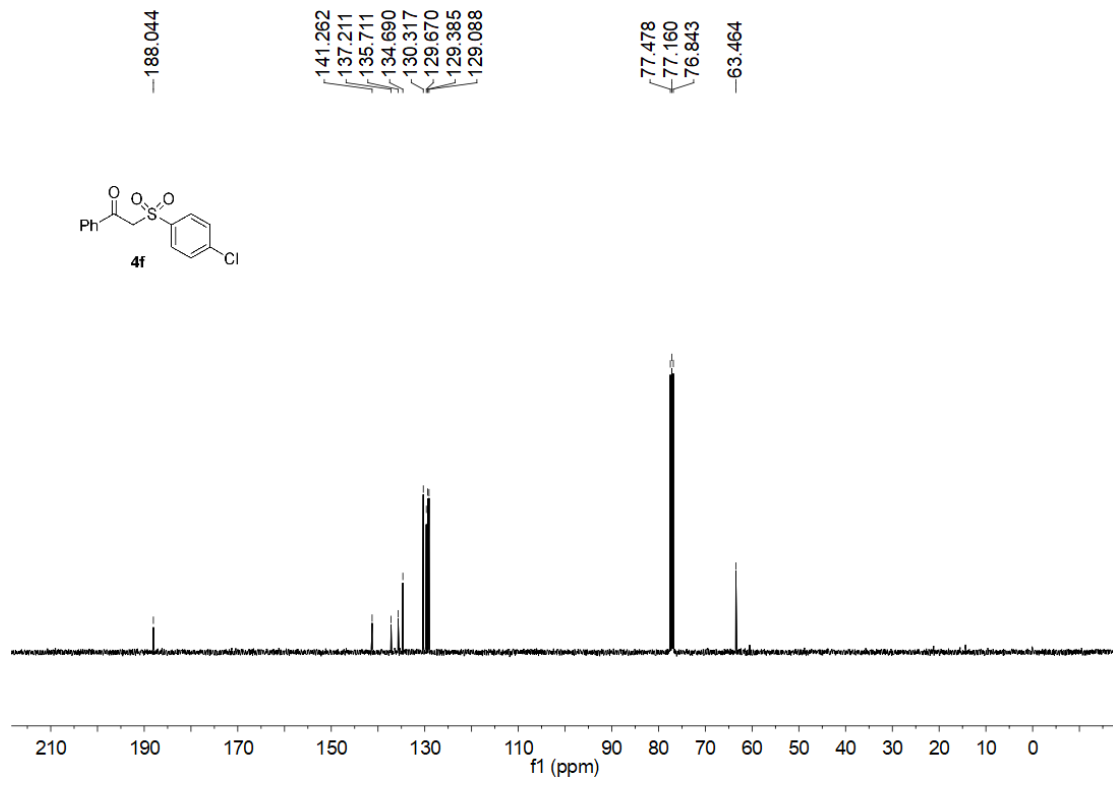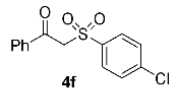

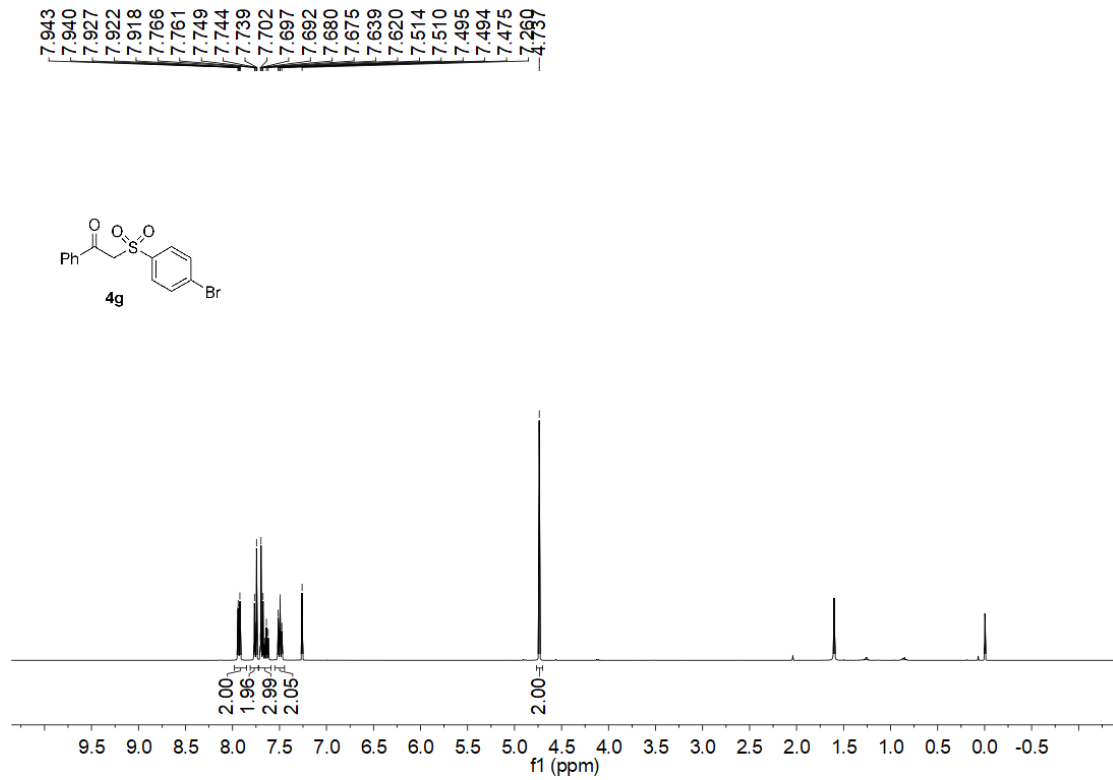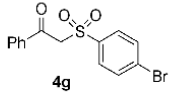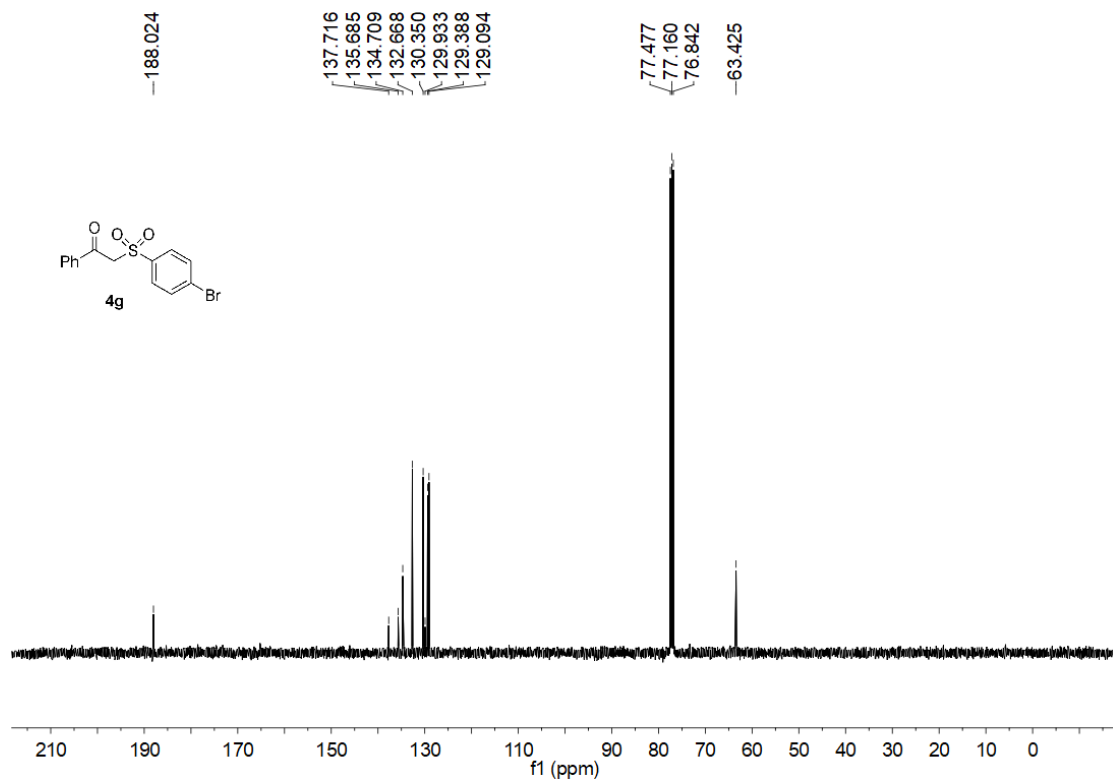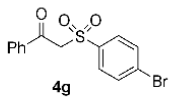

8.165  
8.125  
8.112  
7.928  
7.927  
7.915  
7.912  
7.732  
7.719  
7.706  
7.657  
7.655  
7.653  
7.643  
7.632  
7.630  
7.628  
7.511  
7.498  
7.497  
7.487  
7.485  
7.260  
-4.789

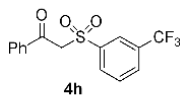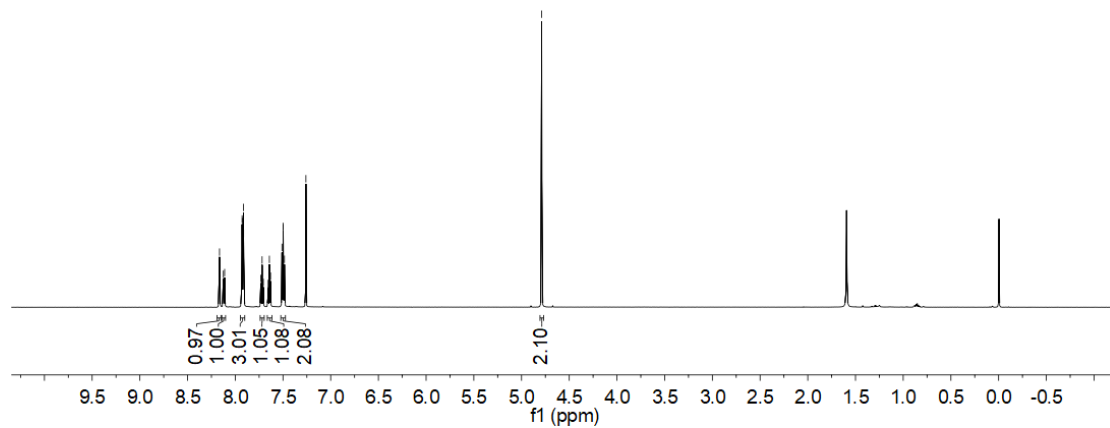

-187.846  
139.979  
135.611  
134.815  
132.300  
132.259  
131.921  
131.592  
131.102  
131.070  
131.036  
131.004  
130.137  
129.329  
129.146  
126.069  
126.034  
125.996  
125.956  
121.790  
119.787  
117.858  
77.477  
77.160  
76.842  
-63.301

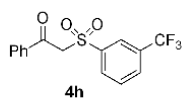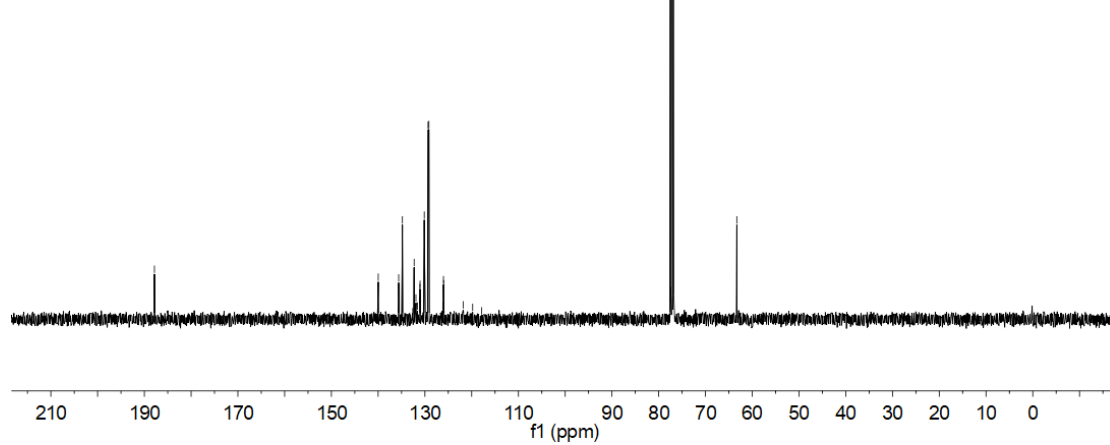

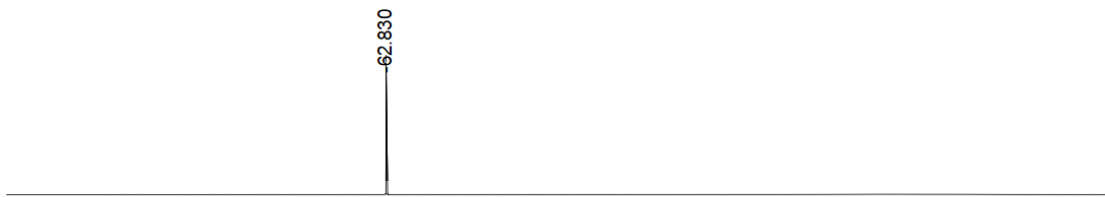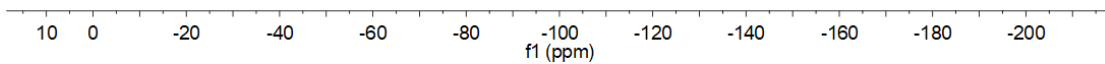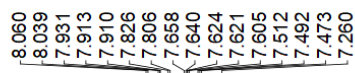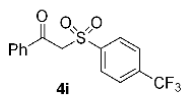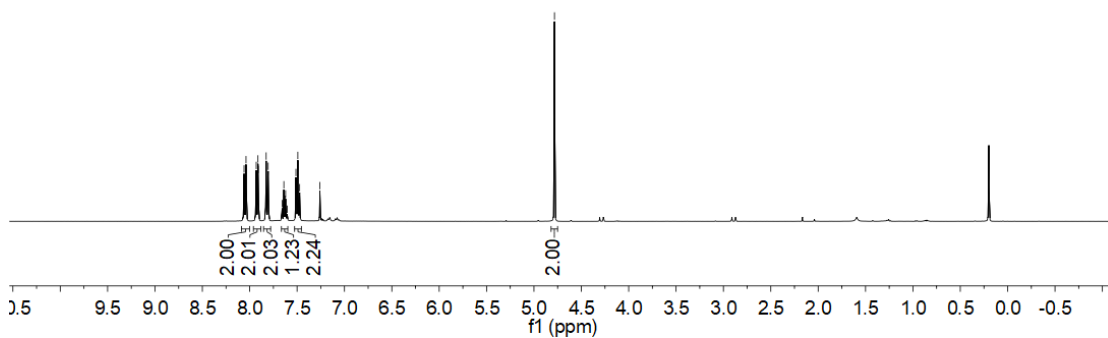

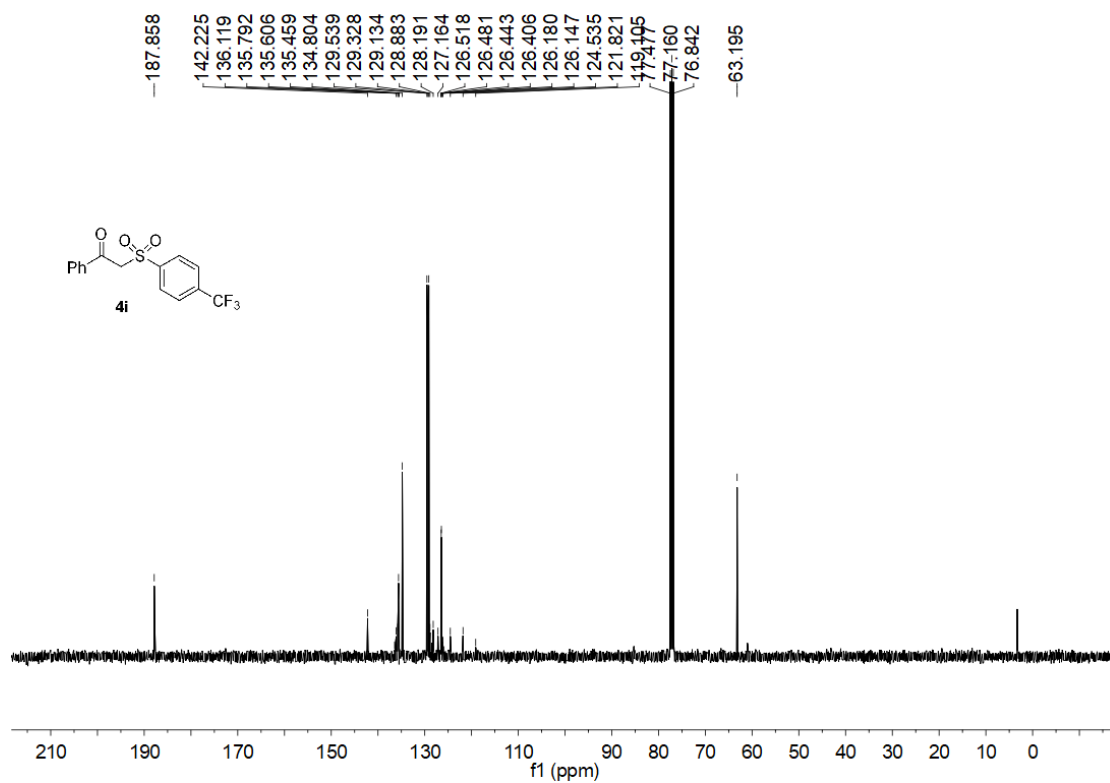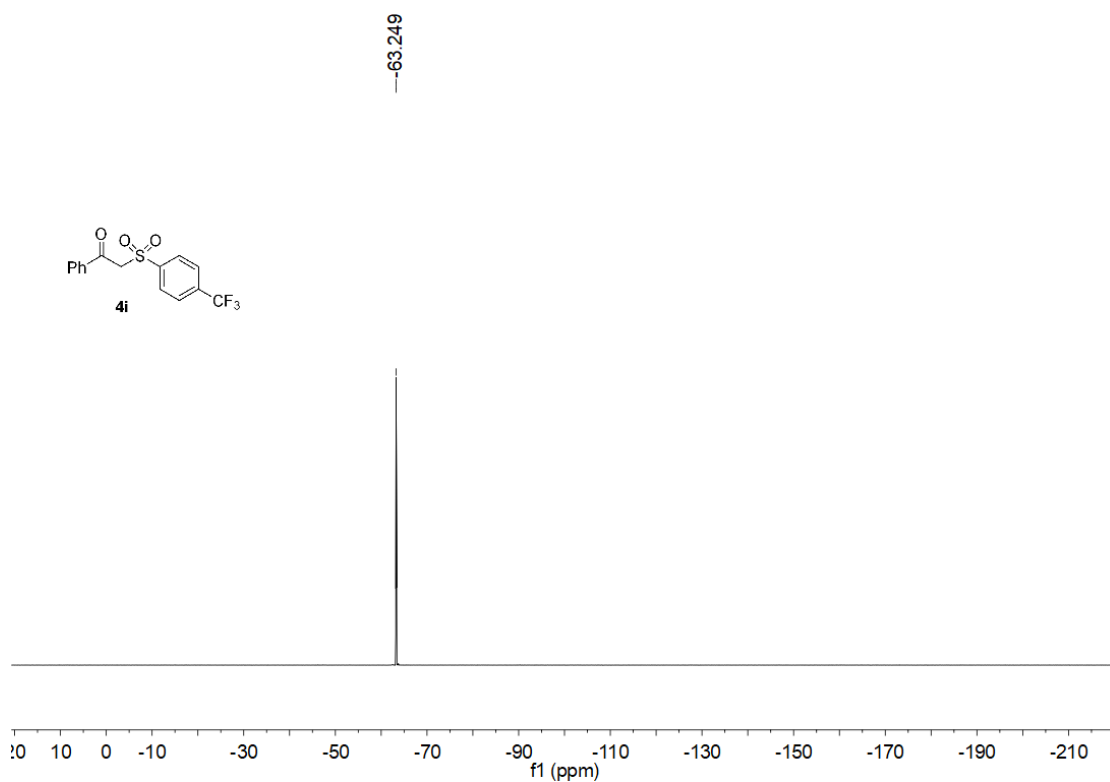



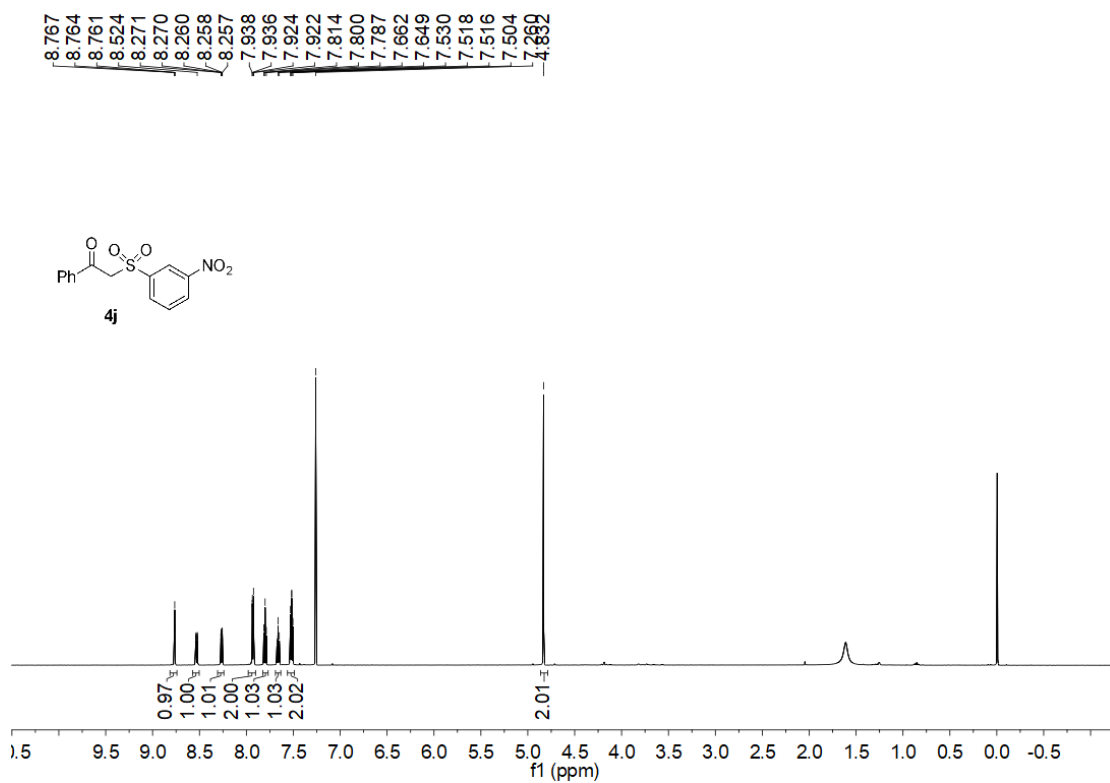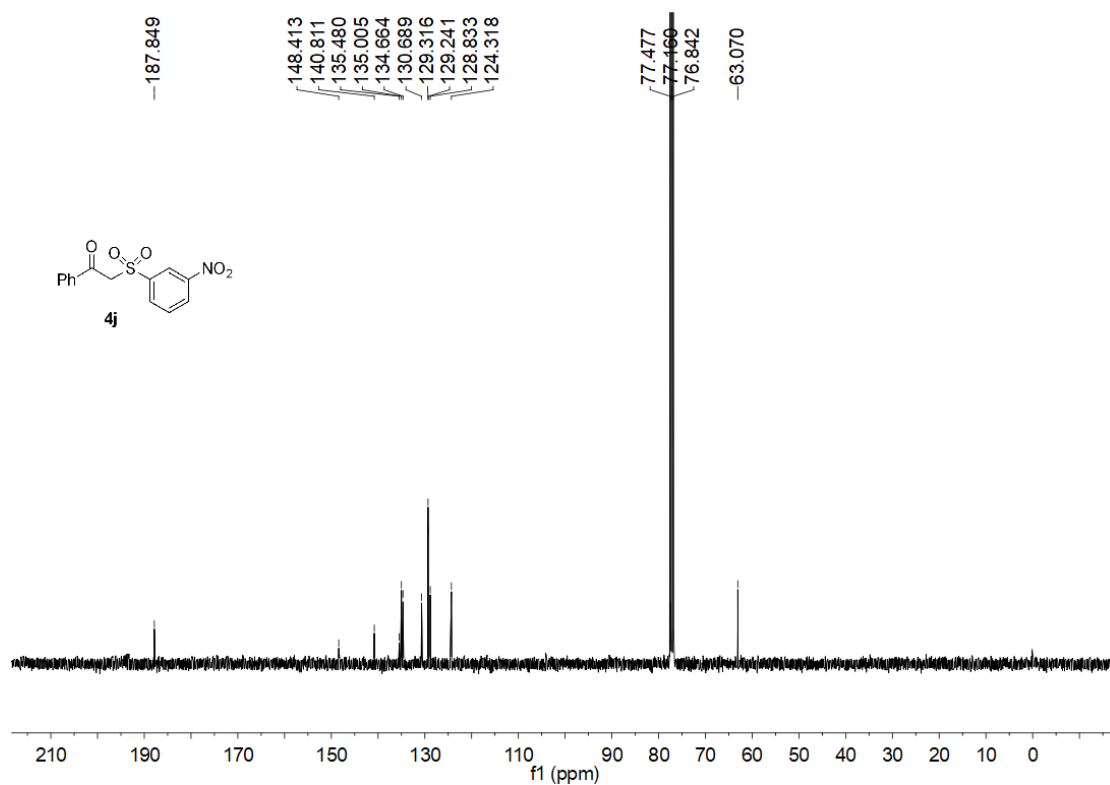

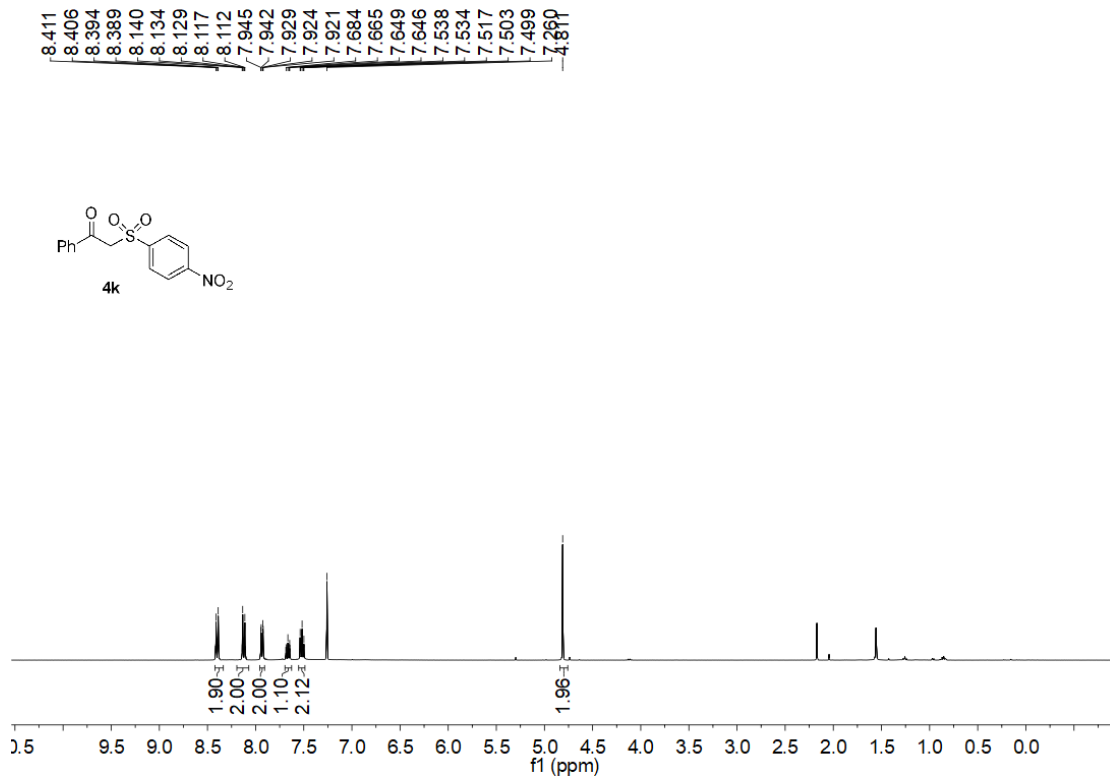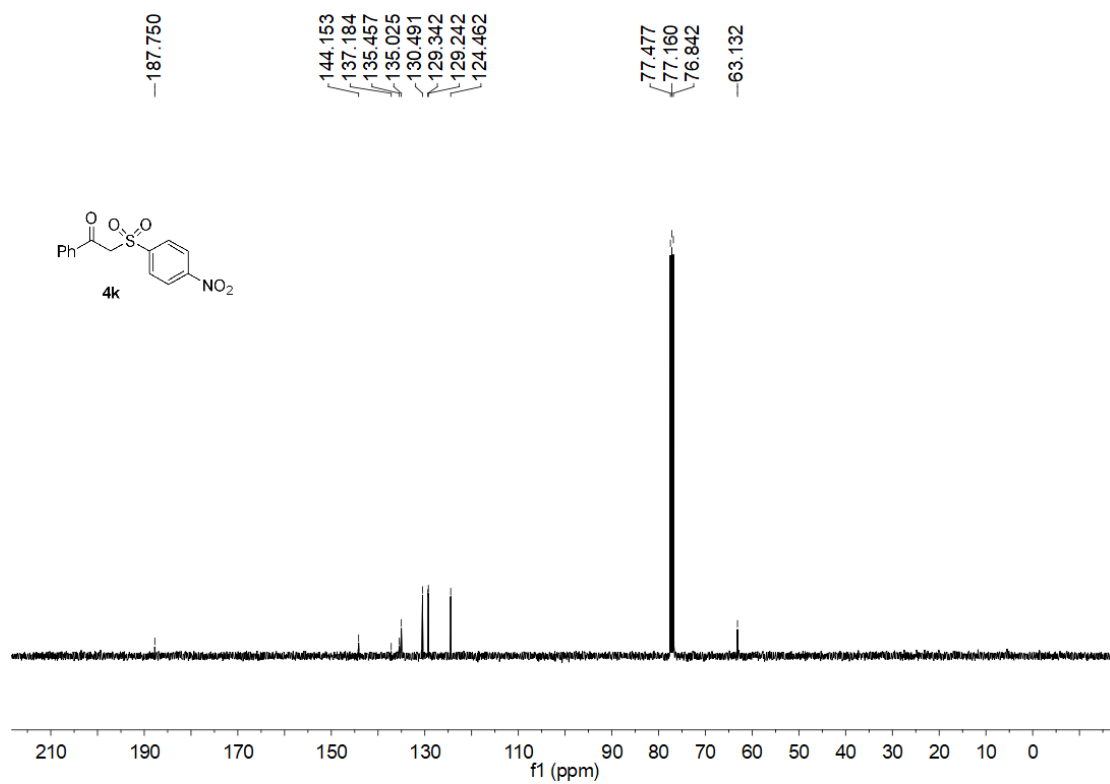

Supplement: d4ra02773f1.pdf [file d4ra02773f1.pdf]
